# Supplementary material for: Analyses of hypoxia-related risk factors and clinical relevance in breast cancer
Source: Front Oncol. 2024 Mar 4;14:1350426. doi: 10.3389/fonc.2024.1350426 (PMC10946248; doi:10.3389/fonc.2024.1350426)
Supplement: Supplementary file 9 [file Table_8.xlsx]

## Sheet: GO BP
ID	Description	GeneRatio	BgRatio	pvalue	p.adjust	qvalue	geneID	Count
GO:0070268	cornification	21/650	113/18862	2.51034e-10	1.1043e-06	9.61328e-07	CASP14/DSG1/KRT6B/KRT14/KRT5/DSC3/IVL/DSG3/KRT17/KRT15/KRT16/KRT23/KLK14/KLK13/SPRR3/PCSK6/KRT31/KRT24/KRT20/KRT79/KRT77	21
GO:0008544	epidermis development	40/650	463/18862	1.00235e-07	0.000202992	0.000176711	HOXB13/ABCA12/CASP14/S100A7/DSG1/KRT6B/KRT14/KRT5/DSC3/SOSTDC1/IVL/DSG3/MED1/KLK7/FERMT1/KRT17/KRT15/KRT16/KRT23/FGFR2/KLK14/FA2H/EDAR/KLK13/FOXC1/BNC1/SPRR3/PCSK6/ALX4/KRTDAP/KRT31/KRT24/LAMA3/KRT20/DCT/KRT79/KRT77/BCL2/NGFR/SULT2B1	40
GO:0043588	skin development	37/650	415/18862	1.38435e-07	0.000202992	0.000176711	ABCA12/CASP14/S100A7/DSG1/KRT6B/KRT14/KRT5/DSC3/SOSTDC1/IVL/DSG3/MED1/ITGB6/FERMT1/KRT17/KRT15/KRT16/KRT23/FGFR2/KLK14/FA2H/EDAR/KLK13/FOXC1/SPRR3/PCSK6/ALX4/KRT31/KRT24/DACT2/KRT20/SLC2A10/KRT79/RYR1/KRT77/BCL2/NGFR	37
GO:0030198	extracellular matrix organization	34/650	393/18862	8.9148e-07	0.000665849	0.000579643	COL2A1/MIA/FGFR4/PTX3/MMP1/SERPINB5/KLK7/COL9A1/ITGB6/FGB/COL11A1/BCAN/FERMT1/MMP13/MMP20/ITGB8/FOXC1/C6orf15/COL10A1/KLK4/MMP11/GREM1/ANGPTL7/LAMA3/CREB3L1/FGF2/SLC2A10/FOXC2/COL27A1/MMP24/GAS2/ADAMTS8/ITGA7/SERPINF2	34
GO:0043062	extracellular structure organization	34/650	394/18862	9.44534e-07	0.000665849	0.000579643	COL2A1/MIA/FGFR4/PTX3/MMP1/SERPINB5/KLK7/COL9A1/ITGB6/FGB/COL11A1/BCAN/FERMT1/MMP13/MMP20/ITGB8/FOXC1/C6orf15/COL10A1/KLK4/MMP11/GREM1/ANGPTL7/LAMA3/CREB3L1/FGF2/SLC2A10/FOXC2/COL27A1/MMP24/GAS2/ADAMTS8/ITGA7/SERPINF2	34
GO:0001501	skeletal system development	39/650	486/18862	9.51118e-07	0.000665849	0.000579643	SFRP1/COL2A1/OTOR/OSR1/EPYC/LHX1/BMP5/MED1/ITGB6/SOX11/COL11A1/BCAN/RGN/LEP/GDF5/FGFR2/MMP13/ITGB8/FOXC1/ALX4/COL10A1/CHRDL2/CHI3L1/ZBTB16/GREM1/HOXC10/FGF2/SLC2A10/DLX6/FOXC2/SOX6/DLL3/COL27A1/RIPPLY2/WNT7B/SIX1/EXTL1/RYR1/KIT	39
GO:0045229	external encapsulating structure organization	34/650	396/18862	1.05955e-06	0.000665849	0.000579643	COL2A1/MIA/FGFR4/PTX3/MMP1/SERPINB5/KLK7/COL9A1/ITGB6/FGB/COL11A1/BCAN/FERMT1/MMP13/MMP20/ITGB8/FOXC1/C6orf15/COL10A1/KLK4/MMP11/GREM1/ANGPTL7/LAMA3/CREB3L1/FGF2/SLC2A10/FOXC2/COL27A1/MMP24/GAS2/ADAMTS8/ITGA7/SERPINF2	34
GO:0007517	muscle organ development	29/650	317/18862	1.87162e-06	0.00102916	0.000895913	PAX7/TCAP/LRP2/RBM24/MED1/SOX11/COL11A1/CHODL/TGFBR3/DNER/SMYD1/FGFR2/SOX8/FOXC1/ALX4/MYOZ1/CRYAB/MKX/CHRNA1/FOXC2/SOX6/SIX1/CDON/RYR1/SRPK3/WNT2/BCL2/DMD/ITGA7	29
GO:0001655	urogenital system development	28/650	320/18862	6.59263e-06	0.00322233	0.00280514	HOXB13/LRP2/SFRP1/OSR1/LHX1/FREM2/SERPINB5/IRX1/SOX11/FOXA1/RGN/FGFR2/SOX8/FOXC1/AR/KLF15/CD24/ZBTB16/GREM1/LIN28A/DACT2/FGF2/CITED1/DCHS2/FOXC2/WNT7B/SIX1/BCL2	28
GO:0031424	keratinization	22/650	225/18862	1.14184e-05	0.00460144	0.00400571	ABCA12/CASP14/DSG1/KRT6B/KRT14/KRT5/DSC3/IVL/DSG3/KRT17/KRT15/KRT16/KRT23/KLK14/KLK13/SPRR3/PCSK6/KRT31/KRT24/KRT20/KRT79/KRT77	22
GO:0072073	kidney epithelium development	16/650	131/18862	1.15062e-05	0.00460144	0.00400571	SFRP1/OSR1/LHX1/IRX1/FGFR2/SOX8/FOXC1/KLF15/CD24/GREM1/FGF2/CITED1/FOXC2/WNT7B/SIX1/BCL2	16
GO:0001823	mesonephros development	13/650	91/18862	1.38966e-05	0.00499047	0.00434437	SFRP1/OSR1/LHX1/FGFR2/SOX8/FOXC1/ZBTB16/GREM1/FGF2/CITED1/FOXC2/SIX1/BCL2	13
GO:0071805	potassium ion transmembrane transport	21/650	212/18862	1.47479e-05	0.00499047	0.00434437	SLC9A2/EDN3/LRRC26/KCNC2/KCNH8/KCNJ16/KCNK3/SNAP25/KCNK1/NETO1/KCNIP1/KCNQ5/WNK3/KCNH2/KCNIP2/KCNB1/KCND3/KCNS1/KCNE5/KCNQ3/ATP12A	21
GO:0072009	nephron epithelium development	14/650	106/18862	1.64322e-05	0.00508308	0.00442498	OSR1/LHX1/IRX1/SOX8/FOXC1/KLF15/CD24/GREM1/FGF2/CITED1/FOXC2/WNT7B/SIX1/BCL2	14
GO:0002526	acute inflammatory response	14/650	107/18862	1.83172e-05	0.00508308	0.00442498	NPY5R/C2CD4A/S100A8/SAA1/SERPINA3/LBP/FFAR2/SAA2/CNR1/EPO/SAA4/PTGS2/DNASE1L3/SERPINF2	14
GO:0006813	potassium ion transport	22/650	232/18862	1.84881e-05	0.00508308	0.00442498	SLC9A2/EDN3/LRRC26/KCNC2/DRD2/KCNH8/KCNJ16/KCNK3/SNAP25/KCNK1/NETO1/KCNIP1/KCNQ5/WNK3/KCNH2/KCNIP2/KCNB1/KCND3/KCNS1/KCNE5/KCNQ3/ATP12A	22
GO:0061351	neural precursor cell proliferation	16/650	138/18862	2.22738e-05	0.00557202	0.00485062	LRP2/PTPRZ1/LHX1/DRD2/ARTN/ARX/FGFR2/IGF2BP1/DCT/FZD9/CDH2/CX3CR1/TRNP1/CDON/WNT2/OTP	16
GO:0006953	acute-phase response	9/650	46/18862	2.27998e-05	0.00557202	0.00485062	SAA1/SERPINA3/LBP/SAA2/CNR1/EPO/SAA4/PTGS2/SERPINF2	9
GO:0003002	regionalization	27/650	326/18862	2.57107e-05	0.00595269	0.00518201	TCAP/LRP2/NKX2-2/SFRP1/SOSTDC1/OSR1/LHX1/IRX1/FOXA1/PCDH8/FGFR2/FOXC1/ALX4/AR/ZBTB16/GREM1/HOXC10/FOXC2/MESP1/DLL3/CELSR2/RIPPLY2/WNT7B/SIX1/CDON/CRB2/WNT2	27
GO:0061053	somite development	12/650	84/18862	2.96107e-05	0.00651287	0.00566967	TCAP/SFRP1/LHX1/SOX11/PCDH8/FOXC1/FOXC2/MESP1/DLL3/RIPPLY2/SIX1/CRB2	12
GO:0060688	regulation of morphogenesis of a branching structure	9/650	48/18862	3.26391e-05	0.00664735	0.00578674	SFRP1/LHX1/BCL11A/FGFR2/SOX8/AR/GREM1/SIX1/WNT2	9
GO:0001657	ureteric bud development	12/650	86/18862	3.76355e-05	0.00664735	0.00578674	SFRP1/OSR1/LHX1/FGFR2/SOX8/FOXC1/GREM1/FGF2/CITED1/FOXC2/SIX1/BCL2	12
GO:0060537	muscle tissue development	29/650	371/18862	3.80361e-05	0.00664735	0.00578674	TCAP/LRP2/OSR1/BMP5/RBM24/MED1/SOX11/COL11A1/TGFBR3/DNER/PI16/SMYD1/FGFR2/SOX8/FOXC1/MYOZ1/GREM1/FGF2/CHRNA1/FOXC2/SOX6/MESP1/SORBS2/SIX1/CDON/RYR1/SRPK3/WNT2/BCL2	29
GO:0003151	outflow tract morphogenesis	11/650	73/18862	3.81423e-05	0.00664735	0.00578674	NPY5R/LRP2/NPY1R/SOX11/TGFBR3/FOLR1/FGFR2/FOXC1/FOXC2/SIX1/RYR1	11
GO:0010001	glial cell differentiation	20/650	210/18862	4.12445e-05	0.00664735	0.00578674	ERBB2/NKX2-2/PTPRZ1/NTRK2/NCMAP/S100A8/SOX11/PLP1/S100A9/DNER/FA2H/SOX8/KLF15/LIN28A/CRB1/SOX6/ZNF488/IL34/MMP24/CDH2	20
GO:0001822	kidney development	24/650	280/18862	4.14037e-05	0.00664735	0.00578674	LRP2/SFRP1/OSR1/LHX1/FREM2/IRX1/SOX11/RGN/FGFR2/SOX8/FOXC1/KLF15/CD24/ZBTB16/GREM1/LIN28A/DACT2/FGF2/CITED1/DCHS2/FOXC2/WNT7B/SIX1/BCL2	24
GO:0072163	mesonephric epithelium development	12/650	87/18862	4.2311e-05	0.00664735	0.00578674	SFRP1/OSR1/LHX1/FGFR2/SOX8/FOXC1/GREM1/FGF2/CITED1/FOXC2/SIX1/BCL2	12
GO:0072164	mesonephric tubule development	12/650	87/18862	4.2311e-05	0.00664735	0.00578674	SFRP1/OSR1/LHX1/FGFR2/SOX8/FOXC1/GREM1/FGF2/CITED1/FOXC2/SIX1/BCL2	12
GO:0032409	regulation of transporter activity	24/650	283/18862	4.90877e-05	0.00744609	0.00648206	GRIA2/OSR1/LRRC26/KCNC2/GRIA1/PDZK1/DRD2/CHRM3/RGN/CRHR1/NETO1/RGS9/GSTM2/EPO/WNK3/KCNIP2/STAC/JPH3/KCNS1/NLGN1/KCNE5/BCL2/SGK2/DMD	24
GO:0030216	keratinocyte differentiation	25/650	302/18862	5.11755e-05	0.00750404	0.00653251	ABCA12/CASP14/S100A7/DSG1/KRT6B/KRT14/KRT5/DSC3/IVL/DSG3/MED1/KRT17/KRT15/KRT16/KRT23/KLK14/KLK13/FOXC1/SPRR3/PCSK6/KRT31/KRT24/KRT20/KRT79/KRT77	25
GO:0022898	regulation of transmembrane transporter activity	23/650	268/18862	5.83834e-05	0.00828479	0.00721218	GRIA2/OSR1/LRRC26/KCNC2/GRIA1/PDZK1/DRD2/CHRM3/RGN/CRHR1/NETO1/RGS9/GSTM2/EPO/WNK3/KCNIP2/STAC/JPH3/KCNS1/NLGN1/KCNE5/BCL2/DMD	23
GO:0045165	cell fate commitment	22/650	251/18862	6.14603e-05	0.00844887	0.00735502	NKX2-2/SFRP1/TBX10/MNX1/SOSTDC1/SPDEF/ONECUT2/FOXA1/ARX/FGFR2/SOX8/AR/HOXC10/FGF2/FOXC2/SOX6/MESP1/WNT7B/SIX1/CDON/WNT2/BCL2	22
GO:0072001	renal system development	24/650	288/18862	6.47726e-05	0.00863439	0.00751652	LRP2/SFRP1/OSR1/LHX1/FREM2/IRX1/SOX11/RGN/FGFR2/SOX8/FOXC1/KLF15/CD24/ZBTB16/GREM1/LIN28A/DACT2/FGF2/CITED1/DCHS2/FOXC2/WNT7B/SIX1/BCL2	24
GO:0001756	somitogenesis	10/650	65/18862	7.13016e-05	0.0090414	0.00787084	TCAP/SFRP1/LHX1/PCDH8/FOXC1/FOXC2/MESP1/DLL3/RIPPLY2/CRB2	10
GO:0018958	phenol-containing compound metabolic process	13/650	106/18862	7.19366e-05	0.0090414	0.00787084	PNMT/IYD/OCA2/MED1/DRD2/CRYM/CHRNB2/TPH1/MAOA/MAOB/DCT/CITED1/BCL2	13
GO:0072006	nephron development	15/650	138/18862	8.44728e-05	0.0103221	0.00898573	OSR1/LHX1/IRX1/SOX8/FOXC1/KLF15/CD24/GREM1/FGF2/CITED1/DCHS2/FOXC2/WNT7B/SIX1/BCL2	15
GO:0032412	regulation of ion transmembrane transporter activity	22/650	257/18862	8.72015e-05	0.0103676	0.0090253	GRIA2/OSR1/LRRC26/KCNC2/GRIA1/PDZK1/DRD2/CHRM3/RGN/CRHR1/NETO1/RGS9/GSTM2/EPO/WNK3/KCNIP2/STAC/JPH3/KCNS1/NLGN1/KCNE5/DMD	22
GO:0014706	striated muscle tissue development	27/650	351/18862	9.14483e-05	0.0105863	0.00921576	TCAP/LRP2/BMP5/RBM24/MED1/SOX11/COL11A1/TGFBR3/DNER/PI16/SMYD1/FGFR2/SOX8/FOXC1/MYOZ1/GREM1/FGF2/CHRNA1/FOXC2/SOX6/MESP1/SORBS2/SIX1/CDON/RYR1/WNT2/BCL2	27
GO:0006936	muscle contraction	27/650	352/18862	9.5901e-05	0.0106325	0.0092559	TCAP/ORMDL3/EDN3/DRD2/MYBPC1/CHRM3/CHRNB2/CHGA/GNAO1/GSTM2/CRYAB/KCNH2/KCNIP2/MYBPC2/CHRNA1/NMUR1/STAC/KCND3/MB/ADRA2C/SCN5A/KCNE5/RYR1/MYOT/TACR1/DMD/KIT	27
GO:0042391	regulation of membrane potential	31/650	431/18862	9.90486e-05	0.0106325	0.0092559	GABRP/NTRK2/KCNC2/GRIA1/DRD2/KCNH8/CHRNB2/ADRB1/KCNK3/KCNK1/SLC25A27/NETO1/CNR1/RIMS1/PMAIP1/CLDN19/KCNH2/KCNIP2/KCNB1/CHRNA1/SLC4A4/FZD9/KCND3/CELF4/NLGN1/SCN5A/KCNE5/SCN3A/BCL2/KCNQ3/DMD	31
GO:0016331	morphogenesis of embryonic epithelium	15/650	140/18862	9.95506e-05	0.0106325	0.0092559	LRP2/SFRP1/OSR1/BMP5/IRX1/SOX11/PCDH8/FOLR1/FGFR2/SOX8/AR/GREM1/WNT7B/SIX1/WNT2	15
GO:0035282	segmentation	12/650	95/18862	0.000101515	0.0106325	0.0092559	TCAP/SFRP1/OSR1/LHX1/IRX1/PCDH8/FOXC1/FOXC2/MESP1/DLL3/RIPPLY2/CRB2	12
GO:0045664	regulation of neuron differentiation	18/650	190/18862	0.000105499	0.0107146	0.0093274	NKX2-2/SFRP1/NEUROD2/MED1/SOX11/FOXA1/BCL11A/GDF5/BDNF/SOX8/EPO/LIN28A/NLGN1/ADRA2C/SIX1/CDON/BCL2/NTF3	18
GO:0003012	muscle system process	32/650	453/18862	0.00010752	0.0107146	0.0093274	TCAP/ORMDL3/EDN3/DRD2/MYBPC1/CHRM3/CHRNB2/LEP/CHGA/PI16/GNAO1/GSTM2/KLF15/MYOZ1/CRYAB/KCNH2/KCNIP2/MYBPC2/CHRNA1/NMUR1/STAC/KCND3/MB/SORBS2/ADRA2C/SCN5A/KCNE5/RYR1/MYOT/TACR1/DMD/KIT	32
GO:0061448	connective tissue development	21/650	243/18862	0.000109606	0.0107146	0.0093274	COL2A1/OTOR/OSR1/EPYC/BMP5/COL11A1/FOXA1/LEP/GDF5/SOX8/ITGB8/CHRDL2/CHI3L1/ZBTB16/GREM1/TNMD/FGF2/FOXC2/SOX6/COL27A1/WNT7B	21
GO:0019730	antimicrobial humoral response	15/650	142/18862	0.000116923	0.0111814	0.00973381	TF/S100A7/BPIFB2/CST9/KLK7/S100A8/FGB/WFDC2/S100A9/CHGA/BPI/AZU1/CAMP/CXCL2/PRSS3	15
GO:0003208	cardiac ventricle morphogenesis	10/650	69/18862	0.000119694	0.0112028	0.00975242	NPY5R/LRP2/MED1/SOX11/COL11A1/TGFBR3/FGFR2/FOXC1/FOXC2/MESP1	10
GO:0055008	cardiac muscle tissue morphogenesis	9/650	57/18862	0.000132862	0.0115472	0.0100522	TCAP/LRP2/MED1/COL11A1/TGFBR3/FGFR2/FOXC1/FOXC2/WNT2	9
GO:0042063	gliogenesis	23/650	283/18862	0.000133011	0.0115472	0.0100522	ERBB2/LRP2/NKX2-2/PTPRZ1/NTRK2/NCMAP/S100A8/SOX11/PLP1/S100A9/DNER/FA2H/SOX8/KLF15/LIN28A/AZU1/CRB1/SOX6/ZNF488/IL34/MMP24/CDH2/CX3CR1	23
GO:1904062	regulation of cation transmembrane transport	26/650	340/18862	0.000134902	0.0115472	0.0100522	GRIA2/OSR1/EDN3/LRRC26/KCNC2/GRIA1/PDZK1/DRD2/PLP1/RGN/CRHR1/NETO1/RGS9/GSTM2/EPO/KCNIP1/WNK3/KCNH2/KCNIP2/STAC/JPH3/KCNS1/NLGN1/SCN5A/KCNE5/DMD	26
GO:0010517	regulation of phospholipase activity	10/650	70/18862	0.000135398	0.0115472	0.0100522	NTRK2/NTRK3/ANXA8L1/ANXA8/BDNF/FGFR2/FGF2/NMUR1/NTF3/KIT	10
GO:2001257	regulation of cation channel activity	17/650	177/18862	0.0001377	0.0115472	0.0100522	GRIA2/LRRC26/KCNC2/GRIA1/DRD2/CRHR1/NETO1/RGS9/GSTM2/EPO/KCNIP2/STAC/JPH3/KCNS1/NLGN1/KCNE5/DMD	17
GO:0009913	epidermal cell differentiation	27/650	360/18862	0.000139123	0.0115472	0.0100522	ABCA12/CASP14/S100A7/DSG1/KRT6B/KRT14/KRT5/DSC3/IVL/DSG3/MED1/KRT17/KRT15/KRT16/KRT23/KLK14/FA2H/KLK13/FOXC1/SPRR3/PCSK6/KRT31/KRT24/KRT20/KRT79/KRT77/SULT2B1	27
GO:0060485	mesenchyme development	23/650	287/18862	0.000163682	0.0132325	0.0115193	SFRP1/OSR1/EDN3/BMP5/RBM24/SOX11/FOXA1/TGFBR3/FOLR1/FGFR2/SOX8/FOXC1/GREM1/NRTN/FOXC2/MESP1/DLL3/CDH2/SIX1/CRB2/WNT2/BCL2/SEMA6A	23
GO:0045745	positive regulation of G protein-coupled receptor signaling pathway	6/650	25/18862	0.000165444	0.0132325	0.0115193	DRD2/KLK6/CHGA/KLK14/MRAP/MRAP2	6
GO:0048863	stem cell differentiation	21/650	251/18862	0.000172431	0.0135451	0.0117914	SFRP1/PSMD3/OSR1/EDN3/RBM24/SOX11/SHC4/CDK12/FOXA1/FOLR1/FGFR2/SOX8/FOXC1/GREM1/LIN28A/NRTN/FOXC2/SOX6/CDH2/KIT/SEMA6A	21
GO:0034329	cell junction assembly	30/650	425/18862	0.000177259	0.0136801	0.0119089	SFRP1/DSG1/KRT14/KRT5/CDH19/NTRK2/DRD2/CHRNB2/UGT8/POF1B/DNER/GJB1/BDNF/FAM107A/CLDN16/GREM1/LAMA3/CLDN19/BSN/IL1RAPL2/SDK2/CDHR3/ADD2/FRMPD2/CDH2/NLGN1/CDH12/SIX1/CDH20/BCL2	30
GO:0007389	pattern specification process	30/650	426/18862	0.000184626	0.0140029	0.01219	TCAP/LRP2/NKX2-2/SFRP1/SOSTDC1/OSR1/LHX1/IRX1/FOXA1/PCDH8/FOLR1/FGFR2/FOXC1/ALX4/AR/ZBTB16/GREM1/HOXC10/CITED1/FOXC2/MESP1/DLL3/CELSR2/RIPPLY2/WNT7B/SIX1/CDON/CRB2/WNT2/RFX3	30
GO:0048857	neural nucleus development	9/650	60/18862	0.000199175	0.0141947	0.0123569	KCNC2/PLP1/CHRNB2/ARX/FGF9/S100A1/MAOB/BCL2/NDRG2	9
GO:0140115	export across plasma membrane	9/650	60/18862	0.000199175	0.0141947	0.0123569	PDZK1/ABCC2/RGS9/KCNH2/KCNIP2/SLC4A4/KCND3/KCNE5/ATP12A	9
GO:0071695	anatomical structure maturation	19/650	218/18862	0.000205712	0.0141947	0.0123569	HOXB13/ROPN1/CNTNAP2/TFCP2L1/ROPN1B/FERMT1/FOXA1/LEP/BCL11A/SOX8/BNC1/EPO/GREM1/KCNIP2/RND1/CX3CR1/RYR1/BCL2/RFX3	19
GO:0098742	cell-cell adhesion via plasma-membrane adhesion molecules	22/650	273/18862	0.000208374	0.0141947	0.0123569	CEACAM6/CEACAM5/DSG1/CDH19/DSC3/DSG3/FAT2/PCDH8/CLDN16/CLDN19/CRB1/SDK2/CDHR3/DCHS2/CELSR2/MMP24/CDH2/NLGN1/CDH12/CDH20/MYOT/CRB2	22
GO:0051953	negative regulation of amine transport	6/650	26/18862	0.000208854	0.0141947	0.0123569	NPY5R/DRD2/LEP/CHGA/CNR1/ADRA2C	6
GO:0072079	nephron tubule formation	5/650	17/18862	0.000209742	0.0141947	0.0123569	OSR1/IRX1/SOX8/GREM1/SIX1	5
GO:2000811	negative regulation of anoikis	5/650	17/18862	0.000209742	0.0141947	0.0123569	CEACAM6/CEACAM5/NTRK2/PDK4/BCL2	5
GO:0072080	nephron tubule development	11/650	88/18862	0.000215188	0.0142304	0.012388	OSR1/LHX1/IRX1/SOX8/CD24/GREM1/FGF2/CITED1/WNT7B/SIX1/BCL2	11
GO:0007422	peripheral nervous system development	10/650	74/18862	0.000216739	0.0142304	0.012388	ERBB2/NTRK2/NCMAP/ONECUT2/ARTN/UGT8/BDNF/FA2H/SOX8/NTF3	10
GO:0007156	homophilic cell adhesion via plasma membrane adhesion molecules	16/650	167/18862	0.000220709	0.0142779	0.0124294	CEACAM6/CEACAM5/DSG1/CDH19/DSC3/DSG3/FAT2/PCDH8/SDK2/CDHR3/DCHS2/CELSR2/CDH2/CDH12/CDH20/MYOT	16
GO:0051216	cartilage development	17/650	185/18862	0.000234576	0.0149175	0.0129861	COL2A1/OTOR/OSR1/EPYC/BMP5/COL11A1/LEP/GDF5/ITGB8/CHRDL2/CHI3L1/ZBTB16/GREM1/FGF2/SOX6/COL27A1/WNT7B	17
GO:0001508	action potential	14/650	135/18862	0.000237377	0.0149175	0.0129861	NTRK2/KCNC2/CHRNB2/CNR1/CLDN19/KCNH2/KCNIP2/KCNB1/CHRNA1/KCND3/SCN5A/KCNE5/SCN3A/DMD	14
GO:0060525	prostate glandular acinus development	4/650	10/18862	0.000248568	0.0150712	0.01312	HOXB13/SFRP1/FOXA1/FGFR2	4
GO:0060742	epithelial cell differentiation involved in prostate gland development	4/650	10/18862	0.000248568	0.0150712	0.01312	HOXB13/FOXA1/FGFR2/AR	4
GO:0001763	morphogenesis of a branching structure	17/650	186/18862	0.000250102	0.0150712	0.01312	HOXB13/SFRP1/LHX1/MED1/DRD2/FOXA1/BCL11A/FGFR2/SOX8/AR/GREM1/FGF2/CITED1/FOXC2/SIX1/WNT2/BCL2	17
GO:0090287	regulation of cellular response to growth factor stimulus	23/650	296/18862	0.00025658	0.0152168	0.0132467	LRP2/SFRP1/SOSTDC1/NTRK3/SOX11/ONECUT2/FERMT1/CIDEA/TGFBR3/FOLR1/GDF5/FGFBP1/PCSK6/GREM1/CREB3L1/TNMD/FGF2/SLC2A10/CITED1/CRB2/NTF3/NGFR/SEMA6A	23
GO:0060512	prostate gland morphogenesis	6/650	27/18862	0.000260763	0.0152168	0.0132467	HOXB13/SFRP1/SERPINB5/FOXA1/FGFR2/AR	6
GO:0061326	renal tubule development	11/650	90/18862	0.000262896	0.0152168	0.0132467	OSR1/LHX1/IRX1/SOX8/CD24/GREM1/FGF2/CITED1/WNT7B/SIX1/BCL2	11
GO:2000179	positive regulation of neural precursor cell proliferation	8/650	50/18862	0.000284483	0.0162524	0.0141483	LRP2/LHX1/DRD2/DCT/FZD9/CX3CR1/CDON/OTP	8
GO:0090596	sensory organ morphogenesis	20/650	244/18862	0.000319543	0.0180214	0.0156882	TCAP/COL2A1/NTRK2/OSR1/LHX1/SOX11/COL11A1/FGFR2/SOX8/ATP6V1B1/MFSD2A/CRB1/SDK2/DLX6/SIX1/CDON/CRB2/WNT2/BCL2/TMIE	20
GO:0042476	odontogenesis	13/650	123/18862	0.00032569	0.0180731	0.0157333	SOSTDC1/OSR1/ITGB6/FGFR2/MMP20/EDAR/FOXC1/GNAO1/KLK4/PAX9/SP6/SCN5A/NGFR	13
GO:1901381	positive regulation of potassium ion transmembrane transport	7/650	39/18862	0.000328677	0.0180731	0.0157333	EDN3/LRRC26/KCNC2/WNK3/KCNH2/KCNIP2/KCNE5	7
GO:0035148	tube formation	14/650	140/18862	0.0003463	0.0188071	0.0163722	TCAP/LRP2/SFRP1/OSR1/BMP5/IRX1/SOX11/FOLR1/FGFR2/SOX8/EDAR/GREM1/FGF2/SIX1	14
GO:0048709	oligodendrocyte differentiation	11/650	93/18862	0.000351008	0.0188303	0.0163924	ERBB2/NKX2-2/PTPRZ1/NTRK2/SOX11/PLP1/FA2H/SOX8/SOX6/ZNF488/IL34	11
GO:0072087	renal vesicle development	5/650	19/18862	0.000372207	0.0195115	0.0169854	OSR1/LHX1/SOX8/GREM1/CITED1	5
GO:1904064	positive regulation of cation transmembrane transport	14/650	141/18862	0.000372577	0.0195115	0.0169854	EDN3/LRRC26/KCNC2/PDZK1/PLP1/RGN/RGS9/GSTM2/WNK3/KCNH2/KCNIP2/STAC/KCNE5/DMD	14
GO:0072175	epithelial tube formation	13/650	125/18862	0.000381417	0.0196795	0.0171317	TCAP/LRP2/SFRP1/OSR1/BMP5/IRX1/SOX11/FOLR1/FGFR2/SOX8/GREM1/FGF2/SIX1	13
GO:0015849	organic acid transport	24/650	324/18862	0.000384732	0.0196795	0.0171317	NPY5R/LRP2/ABCC11/NTRK2/SLC6A15/OCA2/DRD2/KMO/SLC7A4/SLC16A11/SLC27A6/SLC7A3/LEP/FOLR1/SNAP25/ABCC2/SLCO1A2/IRS2/SLC25A18/RIMS1/MFSD2A/SLC38A4/SLC13A5/PLA2G4F	24
GO:0048608	reproductive structure development	28/650	405/18862	0.000402639	0.0203587	0.0177229	HOXB13/LRP2/SFRP1/OSR1/LHX1/PTX3/BMP5/MED1/SERPINB5/FOXA1/LEP/STC2/FGFR2/NDP/TEX19/SOX8/ITGB8/FOXC1/AR/FGF9/ADAM29/CITED1/GAS2/PCYT1B/WNT7B/WNT2/BCL2/KIT	28
GO:0021700	developmental maturation	21/650	268/18862	0.000419174	0.0209539	0.0182411	HOXB13/ROPN1/CNTNAP2/NEUROD2/TFCP2L1/ROPN1B/BCAN/FERMT1/FOXA1/LEP/BCL11A/SOX8/BNC1/EPO/GREM1/KCNIP2/RND1/CX3CR1/RYR1/BCL2/RFX3	21
GO:0048762	mesenchymal cell differentiation	19/650	231/18862	0.00042807	0.0211582	0.0184189	SFRP1/OSR1/EDN3/BMP5/SOX11/FOXA1/TGFBR3/FOLR1/FGFR2/SOX8/FOXC1/GREM1/NRTN/FOXC2/CDH2/CRB2/WNT2/BCL2/SEMA6A	19
GO:0061458	reproductive system development	28/650	408/18862	0.00045268	0.0218165	0.018992	HOXB13/LRP2/SFRP1/OSR1/LHX1/PTX3/BMP5/MED1/SERPINB5/FOXA1/LEP/STC2/FGFR2/NDP/TEX19/SOX8/ITGB8/FOXC1/AR/FGF9/ADAM29/CITED1/GAS2/PCYT1B/WNT7B/WNT2/BCL2/KIT	28
GO:0021953	central nervous system neuron differentiation	16/650	178/18862	0.000453311	0.0218165	0.018992	NKX2-2/SFRP1/MNX1/NTRK2/LHX1/DRD2/FAIM2/CHRNB2/LEP/ARX/FGFR2/HOXC10/NANOS1/NPY/WNT2/OTP	16
GO:0060415	muscle tissue morphogenesis	9/650	67/18862	0.000465205	0.0218165	0.018992	TCAP/LRP2/MED1/COL11A1/TGFBR3/FGFR2/FOXC1/FOXC2/WNT2	9
GO:0072078	nephron tubule morphogenesis	9/650	67/18862	0.000465205	0.0218165	0.018992	OSR1/LHX1/IRX1/SOX8/GREM1/FGF2/CITED1/SIX1/BCL2	9
GO:0060562	epithelial tube morphogenesis	23/650	309/18862	0.000471964	0.0218165	0.018992	TCAP/LRP2/SFRP1/SOSTDC1/OSR1/LHX1/BMP5/MED1/IRX1/SOX11/FOXA1/FOLR1/FGFR2/SOX8/AR/GREM1/FGF2/CITED1/FOXC2/MESP1/SIX1/WNT2/BCL2	23
GO:0110110	positive regulation of animal organ morphogenesis	6/650	30/18862	0.000479058	0.0218165	0.018992	SOX8/AR/MESP1/SIX1/WNT2/NGFR	6
GO:0010720	positive regulation of cell development	22/650	290/18862	0.000481064	0.0218165	0.018992	LRP2/NKX2-2/PTPRZ1/NTRK2/DRD2/SOX11/FGB/CHODL/BDNF/SOX8/BNC1/DCT/RND2/IL34/PAK3/CX3CR1/WNT2/BCL2/NGFR/KIT/OTP/RFX3	22
GO:1903522	regulation of blood circulation	22/650	290/18862	0.000481064	0.0218165	0.018992	EDN3/DRD2/FGB/CHRM3/LEP/CHGA/ADRB1/KCNK3/KCNK1/GNAO1/GSTM2/S100A1/KCNIP1/KCNH2/KCNIP2/KCND3/ADRA2C/SCN5A/KCNE5/RYR1/DMD/CORIN	22
GO:0043010	camera-type eye development	23/650	310/18862	0.000493704	0.0220379	0.0191847	DCX/NTRK2/LHX1/MED1/DRD2/SOX11/NDP/SOX8/FOXC1/CRYAB/MFSD2A/ANGPTL7/CRB1/SDK2/FGF2/PDE6B/FOXC2/CELF4/WNT7B/BIRC7/CDON/CRB2/WNT2	23
GO:0001656	metanephros development	10/650	82/18862	0.000504527	0.0220379	0.0191847	OSR1/LHX1/IRX1/SOX8/GREM1/CITED1/FOXC2/WNT7B/SIX1/BCL2	10
GO:2000177	regulation of neural precursor cell proliferation	10/650	82/18862	0.000504527	0.0220379	0.0191847	LRP2/PTPRZ1/LHX1/DRD2/DCT/FZD9/CDH2/CX3CR1/CDON/OTP	10
GO:0060191	regulation of lipase activity	11/650	97/18862	0.000505985	0.0220379	0.0191847	NTRK2/NTRK3/ANXA8L1/ANXA8/BDNF/FGFR2/PCSK6/FGF2/NMUR1/NTF3/KIT	11
GO:0050808	synapse organization	28/650	412/18862	0.00052789	0.0227665	0.019819	ERBB2/NEUROD2/NTRK2/LRFN2/DRD2/BCAN/CHRNB2/PCDH8/DNER/BDNF/SYN1/CNKSR2/DOK7/BSN/IL1RAPL2/SDK2/CHRNA1/ADD2/FZD9/CDH2/NLGN1/PAK3/SRCIN1/WNT7B/SIX1/CX3CR1/MYOT/RAB39B	28
GO:0050769	positive regulation of neurogenesis	18/650	217/18862	0.000543196	0.0231992	0.0201957	LRP2/NKX2-2/PTPRZ1/NTRK2/DRD2/SOX11/CHODL/BDNF/SOX8/DCT/RND2/IL34/PAK3/CX3CR1/WNT2/NGFR/KIT/OTP	18
GO:0048730	epidermis morphogenesis	6/650	31/18862	0.000576903	0.0243044	0.0211577	SOSTDC1/KRT17/FGFR2/KLK14/BCL2/NGFR	6
GO:0072088	nephron epithelium morphogenesis	9/650	69/18862	0.000580122	0.0243044	0.0211577	OSR1/LHX1/IRX1/SOX8/GREM1/FGF2/CITED1/SIX1/BCL2	9
GO:0016339	calcium-dependent cell-cell adhesion via plasma membrane cell adhesion molecules	7/650	43/18862	0.000611244	0.0248849	0.0216631	DSG1/CDH19/CDHR3/CDH2/NLGN1/CDH12/CDH20	7
GO:0014031	mesenchymal cell development	10/650	84/18862	0.000612341	0.0248849	0.0216631	EDN3/SOX11/FOLR1/SOX8/FOXC1/NRTN/FOXC2/CDH2/BCL2/SEMA6A	10
GO:0003206	cardiac chamber morphogenesis	12/650	115/18862	0.000613813	0.0248849	0.0216631	NPY5R/LRP2/BMP5/MED1/SOX11/COL11A1/TGFBR3/FGFR2/FOXC1/FOXC2/MESP1/WNT2	12
GO:0050890	cognition	21/650	276/18862	0.000616606	0.0248849	0.0216631	CNTNAP2/PTPRZ1/NEUROD2/NTRK2/S100B/GRIA1/DRD2/ADCY1/CHRNB2/BDNF/SNAP25/FAM107A/NETO1/CNR1/MFSD2A/TMPRSS11E/FZD9/JPH3/CX3CR1/NTF3/KIT	21
GO:0043266	regulation of potassium ion transport	11/650	100/18862	0.000656597	0.0262579	0.0228584	EDN3/LRRC26/KCNC2/DRD2/NETO1/KCNIP1/WNK3/KCNH2/KCNIP2/KCNS1/KCNE5	11
GO:0009952	anterior/posterior pattern specification	17/650	203/18862	0.000688472	0.0272846	0.0237521	TCAP/SFRP1/OSR1/LHX1/PCDH8/FOXC1/ALX4/ZBTB16/HOXC10/FOXC2/MESP1/DLL3/CELSR2/RIPPLY2/CDON/CRB2/WNT2	17
GO:0010863	positive regulation of phospholipase C activity	7/650	44/18862	0.000705579	0.0272942	0.0237605	NTRK2/NTRK3/BDNF/FGF2/NMUR1/NTF3/KIT	7
GO:0055010	ventricular cardiac muscle tissue morphogenesis	7/650	44/18862	0.000705579	0.0272942	0.0237605	LRP2/MED1/COL11A1/TGFBR3/FGFR2/FOXC1/FOXC2	7
GO:0061333	renal tubule morphogenesis	9/650	71/18862	0.000717292	0.0272942	0.0237605	OSR1/LHX1/IRX1/SOX8/GREM1/FGF2/CITED1/SIX1/BCL2	9
GO:0072028	nephron morphogenesis	9/650	71/18862	0.000717292	0.0272942	0.0237605	OSR1/LHX1/IRX1/SOX8/GREM1/FGF2/CITED1/SIX1/BCL2	9
GO:0044706	multi-multicellular organism process	17/650	204/18862	0.000727646	0.0272942	0.0237605	DSG1/EPYC/MED1/LEP/STC2/CRHR1/AMBP/KLK14/ABCC2/CNR1/AR/RLN2/EPO/PTGFR/ADRA2C/BCL2/CORIN	17
GO:0001654	eye development	25/650	359/18862	0.000727706	0.0272942	0.0237605	DCX/NTRK2/LHX1/FREM2/MED1/DRD2/SOX11/NDP/SOX8/FOXC1/CRYAB/MFSD2A/ANGPTL7/CRB1/SDK2/FGF2/PDE6B/FOXC2/CELF4/WNT7B/BIRC7/CDON/CRB2/WNT2/BCL2	25
GO:0048638	regulation of developmental growth	23/650	319/18862	0.000732148	0.0272942	0.0237605	NPY1R/DRD2/TGFBR3/LEP/BCL11A/ARX/PI16/GDF5/ADRB1/BDNF/FGFR2/FOXC1/AR/RIMS1/MYOZ1/MFSD2A/FGF2/FOXC2/RND2/SIX1/WNT2/BCL2/SEMA6A	23
GO:1901379	regulation of potassium ion transmembrane transport	10/650	86/18862	0.000738517	0.0273003	0.0237658	EDN3/LRRC26/KCNC2/NETO1/KCNIP1/WNK3/KCNH2/KCNIP2/KCNS1/KCNE5	10
GO:0007281	germ cell development	20/650	261/18862	0.000753726	0.0276304	0.0240531	ROPN1/DMRTC2/PTX3/TDRD1/ROPN1B/OCA2/NME5/BNC1/DDX25/ZBTB16/LIN28A/DPY19L2/NANOS1/PTCHD3/PACRG/CELF4/SOHLH1/NPM2/BCL2/KIT	20
GO:0033604	negative regulation of catecholamine secretion	4/650	13/18862	0.000779157	0.0278659	0.0242582	DRD2/CHGA/CNR1/ADRA2C	4
GO:0071599	otic vesicle development	4/650	13/18862	0.000779157	0.0278659	0.0242582	TCAP/COL2A1/FGFR2/SIX1	4
GO:0097091	synaptic vesicle clustering	4/650	13/18862	0.000779157	0.0278659	0.0242582	SYN2/SYN1/CDH2/NLGN1	4
GO:0060042	retina morphogenesis in camera-type eye	8/650	58/18862	0.000797817	0.0283032	0.0246389	NTRK2/LHX1/SOX8/MFSD2A/CRB1/SDK2/CDON/CRB2	8
GO:1905332	positive regulation of morphogenesis of an epithelium	6/650	33/18862	0.000818545	0.0288062	0.0250768	LHX1/SOX8/AR/GREM1/FGF2/SIX1	6
GO:0150063	visual system development	25/650	363/18862	0.000852475	0.0297622	0.025909	DCX/NTRK2/LHX1/FREM2/MED1/DRD2/SOX11/NDP/SOX8/FOXC1/CRYAB/MFSD2A/ANGPTL7/CRB1/SDK2/FGF2/PDE6B/FOXC2/CELF4/WNT7B/BIRC7/CDON/CRB2/WNT2/BCL2	25
GO:0048644	muscle organ morphogenesis	9/650	73/18862	0.000879819	0.0301915	0.0262827	TCAP/LRP2/MED1/COL11A1/TGFBR3/FGFR2/FOXC1/FOXC2/WNT2	9
GO:0001708	cell fate specification	10/650	88/18862	0.00088536	0.0301915	0.0262827	NKX2-2/TBX10/MNX1/FOXA1/AR/HOXC10/FGF2/MESP1/SIX1/CDON	10
GO:0060993	kidney morphogenesis	10/650	88/18862	0.00088536	0.0301915	0.0262827	OSR1/LHX1/IRX1/SOX8/GREM1/FGF2/CITED1/WNT7B/SIX1/BCL2	10
GO:0072171	mesonephric tubule morphogenesis	8/650	59/18862	0.000895583	0.0303051	0.0263816	OSR1/LHX1/SOX8/GREM1/FGF2/CITED1/SIX1/BCL2	8
GO:0043268	positive regulation of potassium ion transport	7/650	46/18862	0.000928644	0.0309478	0.026941	EDN3/LRRC26/KCNC2/WNK3/KCNH2/KCNIP2/KCNE5	7
GO:1900274	regulation of phospholipase C activity	7/650	46/18862	0.000928644	0.0309478	0.026941	NTRK2/NTRK3/BDNF/FGF2/NMUR1/NTF3/KIT	7
GO:0060571	morphogenesis of an epithelial fold	5/650	23/18862	0.000960885	0.0316907	0.0275878	SOSTDC1/BMP5/FGFR2/AR/WNT2	5
GO:0010092	specification of animal organ identity	6/650	34/18862	0.000965346	0.0316907	0.0275878	LRP2/FGFR2/AR/MESP1/SIX1/WNT2	6
GO:0061138	morphogenesis of a branching epithelium	15/650	173/18862	0.000979447	0.0317336	0.0276252	HOXB13/SFRP1/LHX1/MED1/FOXA1/FGFR2/SOX8/AR/GREM1/FGF2/CITED1/FOXC2/SIX1/WNT2/BCL2	15
GO:0042303	molting cycle	11/650	105/18862	0.000989684	0.0317336	0.0276252	KRT14/SOSTDC1/FERMT1/KRT17/KRT16/FGFR2/FA2H/EDAR/ALX4/BCL2/NGFR	11
GO:0042633	hair cycle	11/650	105/18862	0.000989684	0.0317336	0.0276252	KRT14/SOSTDC1/FERMT1/KRT17/KRT16/FGFR2/FA2H/EDAR/ALX4/BCL2/NGFR	11
GO:0010518	positive regulation of phospholipase activity	8/650	60/18862	0.00100272	0.0317336	0.0276252	NTRK2/NTRK3/BDNF/FGFR2/FGF2/NMUR1/NTF3/KIT	8
GO:0061098	positive regulation of protein tyrosine kinase activity	8/650	60/18862	0.00100272	0.0317336	0.0276252	NTRK2/BDNF/CD24/GREM1/DOK7/IL34/EPGN/SRCIN1	8
GO:0014033	neural crest cell differentiation	10/650	90/18862	0.00105535	0.0331606	0.0288674	SFRP1/EDN3/SOX11/FOLR1/SOX8/FOXC1/NRTN/FOXC2/CDH2/SEMA6A	10
GO:0048880	sensory system development	25/650	369/18862	0.0010744	0.0335198	0.0291801	DCX/NTRK2/LHX1/FREM2/MED1/DRD2/SOX11/NDP/SOX8/FOXC1/CRYAB/MFSD2A/ANGPTL7/CRB1/SDK2/FGF2/PDE6B/FOXC2/CELF4/WNT7B/BIRC7/CDON/CRB2/WNT2/BCL2	25
GO:0051897	positive regulation of protein kinase B signaling	15/650	175/18862	0.00110087	0.0341037	0.0296884	ERBB2/LRP2/FGFR4/LEP/FGFR2/IRS2/CHI3L1/FGF9/LIN28A/NRG2/FGF2/EPGN/CX3CR1/FGF17/KIT	15
GO:0030858	positive regulation of epithelial cell differentiation	8/650	61/18862	0.00111987	0.0342105	0.0297814	LHX1/MED1/FOXC1/CD24/FGF2/MESP1/SULT2B1/RFX3	8
GO:1905330	regulation of morphogenesis of an epithelium	8/650	61/18862	0.00111987	0.0342105	0.0297814	SFRP1/LHX1/SOX8/AR/GREM1/FGF2/SIX1/WNT2	8
GO:0048167	regulation of synaptic plasticity	15/650	176/18862	0.00116619	0.0346529	0.0301665	NEUROD2/NTRK2/GRIA1/DRD2/ADCY1/SNAP25/FAM107A/NETO1/RIMS1/KCNB1/JPH3/NLGN1/CX3CR1/KIT/SCT	15
GO:0090092	regulation of transmembrane receptor protein serine/threonine kinase signaling pathway	19/650	251/18862	0.00116774	0.0346529	0.0301665	LRP2/SFRP1/SOSTDC1/IGSF1/BMP5/SOX11/ONECUT2/FERMT1/CIDEA/TGFBR3/FOLR1/GDF5/LEFTY2/PCSK6/GREM1/DACT2/SLC2A10/CITED1/CRB2	19
GO:0048705	skeletal system morphogenesis	17/650	213/18862	0.00117458	0.0346529	0.0301665	SFRP1/COL2A1/OTOR/OSR1/LHX1/SOX11/COL11A1/FGFR2/MMP13/FOXC1/ALX4/GREM1/FOXC2/SOX6/COL27A1/RIPPLY2/SIX1	17
GO:0030318	melanocyte differentiation	5/650	24/18862	0.00117967	0.0346529	0.0301665	EDN3/OCA2/CITED1/BCL2/KIT	5
GO:2000209	regulation of anoikis	5/650	24/18862	0.00117967	0.0346529	0.0301665	CEACAM6/CEACAM5/NTRK2/PDK4/BCL2	5
GO:0002067	glandular epithelial cell differentiation	7/650	48/18862	0.0012038	0.0346529	0.0301665	NKX2-2/BMP5/SPDEF/FOXA1/FGFR2/CDH2/RFX3	7
GO:0035850	epithelial cell differentiation involved in kidney development	7/650	48/18862	0.0012038	0.0346529	0.0301665	OSR1/LHX1/KLF15/CD24/GREM1/CITED1/FOXC2	7
GO:0070839	metal ion export	7/650	48/18862	0.0012038	0.0346529	0.0301665	RGS9/KCNH2/KCNIP2/SLC4A4/KCND3/KCNE5/ATP12A	7
GO:0072507	divalent inorganic cation homeostasis	31/650	499/18862	0.00120525	0.0346529	0.0301665	RIC3/EDN3/GRIA1/DRD2/S100A8/GPR12/SAA1/ATP13A5/RGN/S100A9/STC2/KCNK3/ATP6V1B1/ATP13A4/SLC25A27/CCKBR/CNR1/GSTM2/EPO/CD24/FGF2/PTGFR/FZD9/JPH3/MT1M/CX3CR1/RYR1/TACR1/BCL2/DMD/OPRL1	31
GO:0051147	regulation of muscle cell differentiation	14/650	159/18862	0.0012309	0.0350428	0.0305059	CEACAM5/RBM24/PI16/SMYD1/BDNF/FGFR2/FGF9/GREM1/SOX6/MESP1/CDH2/CDON/BCL2/KIT	14
GO:0007565	female pregnancy	15/650	177/18862	0.00123474	0.0350428	0.0305059	DSG1/EPYC/MED1/LEP/STC2/CRHR1/AMBP/ABCC2/CNR1/AR/RLN2/EPO/ADRA2C/BCL2/CORIN	15
GO:0045927	positive regulation of growth	19/650	253/18862	0.00128144	0.036135	0.0314567	ERBB2/SFRP1/TFCP2L1/DRD2/S100A8/KRT17/TGFBR3/LEP/ARX/S100A9/BDNF/FGFR2/RIMS1/MFSD2A/FGF2/RND2/WNT2/BCL2/IGFBP1	19
GO:0072503	cellular divalent inorganic cation homeostasis	30/650	480/18862	0.00130827	0.0366566	0.0319107	RIC3/EDN3/GRIA1/DRD2/S100A8/GPR12/SAA1/ATP13A5/RGN/S100A9/STC2/KCNK3/ATP13A4/SLC25A27/CCKBR/CNR1/GSTM2/EPO/CD24/FGF2/PTGFR/FZD9/JPH3/MT1M/CX3CR1/RYR1/TACR1/BCL2/DMD/OPRL1	30
GO:0048754	branching morphogenesis of an epithelial tube	13/650	143/18862	0.00135877	0.0374826	0.0326299	LHX1/MED1/FOXA1/FGFR2/SOX8/AR/GREM1/FGF2/CITED1/FOXC2/SIX1/WNT2/BCL2	13
GO:0006835	dicarboxylic acid transport	10/650	93/18862	0.00135959	0.0374826	0.0326299	NPY5R/LRP2/NTRK2/KMO/FOLR1/SNAP25/ABCC2/SLC25A18/RIMS1/SLC13A5	10
GO:0007611	learning or memory	18/650	235/18862	0.00136332	0.0374826	0.0326299	CNTNAP2/PTPRZ1/NEUROD2/NTRK2/S100B/GRIA1/DRD2/ADCY1/CHRNB2/BDNF/SNAP25/NETO1/CNR1/FZD9/JPH3/CX3CR1/NTF3/KIT	18
GO:0002070	epithelial cell maturation	4/650	15/18862	0.00140795	0.0382318	0.033282	HOXB13/TFCP2L1/FOXA1/RFX3	4
GO:0060572	morphogenesis of an epithelial bud	4/650	15/18862	0.00140795	0.0382318	0.033282	SOSTDC1/FGFR2/AR/WNT2	4
GO:0060740	prostate gland epithelium morphogenesis	5/650	25/18862	0.00143323	0.0385677	0.0335744	HOXB13/SFRP1/FOXA1/FGFR2/AR	5
GO:0045137	development of primary sexual characteristics	17/650	217/18862	0.00143785	0.0385677	0.0335744	LRP2/SFRP1/OSR1/PTX3/LEP/TEX19/SOX8/FOXC1/AR/FGF9/ADAM29/DACH2/CBX2/GAS2/PCYT1B/BCL2/KIT	17
GO:0022412	cellular process involved in reproduction in multicellular organism	24/650	357/18862	0.00148741	0.0396551	0.0345211	ROPN1/DMRTC2/SFRP1/PTX3/TDRD1/ROPN1B/OCA2/FOLR1/NME5/TEX19/FOXC1/BNC1/DDX25/ZBTB16/LIN28A/DPY19L2/NANOS1/PTCHD3/PACRG/CELF4/SOHLH1/NPM2/BCL2/KIT	24
GO:0042445	hormone metabolic process	17/650	218/18862	0.00151095	0.0399545	0.0347817	IYD/STARD3/UGT2B11/BMP5/MED1/SDR16C5/PCSK1/CHST9/KLK6/CRYM/AKR1B10/FOXA1/PCSK1N/LEP/STC2/PCSK6/CORIN	17
GO:0010466	negative regulation of peptidase activity	19/650	257/18862	0.00153734	0.0399545	0.0347817	SPINK8/SERPINA6/CST9/ANXA8L1/SERPINB5/ANXA8/SERPINA10/PI15/WFDC2/SERPINA3/SERPINA12/PCSK1N/AMBP/PI16/CRYAB/UMODL1/CRB2/NGFR/SERPINF2	19
GO:0003229	ventricular cardiac muscle tissue development	7/650	50/18862	0.00153902	0.0399545	0.0347817	LRP2/MED1/COL11A1/TGFBR3/FGFR2/FOXC1/FOXC2	7
GO:0060041	retina development in camera-type eye	13/650	145/18862	0.00154157	0.0399545	0.0347817	DCX/NTRK2/LHX1/MED1/NDP/SOX8/MFSD2A/CRB1/SDK2/PDE6B/CELF4/CDON/CRB2	13
GO:0007178	transmembrane receptor protein serine/threonine kinase signaling pathway	24/650	358/18862	0.00154405	0.0399545	0.0347817	LRP2/SFRP1/TF/SOSTDC1/IGSF1/BMP5/ITGB6/SOX11/ONECUT2/FERMT1/CIDEA/TGFBR3/FOLR1/GDF5/ITGB8/LEFTY2/PCSK6/GREM1/DUSP15/RGMA/DACT2/SLC2A10/CITED1/CRB2	24
GO:0046660	female sex differentiation	11/650	111/18862	0.00156221	0.040188	0.034985	LRP2/SFRP1/LHX1/PTX3/LEP/FOXC1/DACH2/GAS2/PCYT1B/BCL2/KIT	11
GO:0001503	ossification	26/650	401/18862	0.00161274	0.0412469	0.0359067	SFRP1/COL2A1/OSR1/CYP24A1/BMP5/SOX11/COL11A1/LEP/GDF5/FGFR2/SOX8/ATP6V1B1/FOXC1/CHRDL2/TPH1/ZBTB16/GREM1/CREB3L1/CITED1/FOXC2/FZD9/RIPPLY2/WNT7B/RYR1/TP53INP2/BCL2	26
GO:0003007	heart morphogenesis	18/650	239/18862	0.0016462	0.0416186	0.0362303	TCAP/NPY5R/LRP2/NPY1R/COL2A1/BMP5/MED1/SOX11/COL11A1/TGFBR3/FOLR1/FGFR2/FOXC1/FOXC2/MESP1/SIX1/RYR1/WNT2	18
GO:0006814	sodium ion transport	18/650	239/18862	0.0016462	0.0416186	0.0362303	SLC9A2/OSR1/SLC6A15/DRD2/SCNN1G/ATP6V1B1/KCNK1/NETO1/SLC6A2/WNK3/SLC38A4/SLC13A5/SLC4A4/SCN5A/SCN3A/DMD/ATP12A/SLC5A9	18
GO:0032411	positive regulation of transporter activity	11/650	112/18862	0.00167978	0.0422248	0.0367581	LRRC26/KCNC2/PDZK1/RGN/RGS9/GSTM2/WNK3/KCNIP2/STAC/SGK2/DMD	11
GO:0014032	neural crest cell development	9/650	80/18862	0.001699	0.0424654	0.0369675	EDN3/SOX11/FOLR1/SOX8/FOXC1/NRTN/FOXC2/CDH2/SEMA6A	9
GO:0007605	sensory perception of sound	13/650	147/18862	0.0017443	0.0433389	0.037728	LRP2/COL2A1/OTOR/EPYC/CRYM/COL11A1/CHRNB2/TMPRSS3/ATP6V1B1/DCDC2/SIX1/TMIE/KIT	13
GO:0046883	regulation of hormone secretion	19/650	260/18862	0.00175663	0.0433389	0.037728	SFRP1/EDN3/KCNC2/DRD2/ENHO/SOX11/FGB/LEP/CRHR1/FFAR2/CHGA/SNAP25/CNR1/IRS2/KCNB1/ADRA2C/NNAT/SCT/RFX3	19
GO:0010463	mesenchymal cell proliferation	6/650	38/18862	0.00176351	0.0433389	0.037728	OSR1/FGFR2/IRS2/DCHS2/SIX1/WNT2	6
GO:0050804	modulation of chemical synaptic transmission	26/650	405/18862	0.00185156	0.0448161	0.0390139	NPY5R/NEUROD2/NTRK2/LRFN2/GRIA1/DRD2/KMO/ADCY1/CHRNB2/DLGAP1/BDNF/SNAP25/FAM107A/NETO1/CNR1/SYN1/RIMS1/KCNB1/JPH3/CELF4/CDH2/NLGN1/CX3CR1/NTF3/KIT/SCT	26
GO:0035265	organ growth	14/650	166/18862	0.00185418	0.0448161	0.0390139	TGFBR3/LEP/ARX/PI16/FGFR2/FOXC1/AR/FGF2/FOXC2/MESP1/COL27A1/SORBS2/WNT2/BCL2	14
GO:0048469	cell maturation	14/650	166/18862	0.00185418	0.0448161	0.0390139	HOXB13/ROPN1/CNTNAP2/TFCP2L1/ROPN1B/FOXA1/BCL11A/SOX8/BNC1/EPO/KCNIP2/RND1/BCL2/RFX3	14
GO:0099177	regulation of trans-synaptic signaling	26/650	406/18862	0.00191579	0.0458327	0.0398989	NPY5R/NEUROD2/NTRK2/LRFN2/GRIA1/DRD2/KMO/ADCY1/CHRNB2/DLGAP1/BDNF/SNAP25/FAM107A/NETO1/CNR1/SYN1/RIMS1/KCNB1/JPH3/CELF4/CDH2/NLGN1/CX3CR1/NTF3/KIT/SCT	26
GO:0007548	sex differentiation	19/650	262/18862	0.00191708	0.0458327	0.0398989	LRP2/DMRTC2/SFRP1/OSR1/LHX1/PTX3/LEP/TEX19/SOX8/FOXC1/AR/FGF9/ADAM29/DACH2/CBX2/GAS2/PCYT1B/BCL2/KIT	19
GO:0003231	cardiac ventricle development	11/650	114/18862	0.00193662	0.0458982	0.0399559	NPY5R/LRP2/MED1/SOX11/COL11A1/TGFBR3/FGFR2/FOXC1/FOXC2/MESP1/SCN5A	11
GO:0001658	branching involved in ureteric bud morphogenesis	7/650	52/18862	0.00194278	0.0458982	0.0399559	LHX1/SOX8/GREM1/FGF2/CITED1/SIX1/BCL2	7
GO:0071772	response to BMP	14/650	167/18862	0.00196155	0.0458982	0.0399559	LRP2/SFRP1/COL2A1/SOSTDC1/BMP5/SOX11/TGFBR3/GDF5/LEFTY2/PCSK6/GREM1/RGMA/TNMD/CRB2	14
GO:0071773	cellular response to BMP stimulus	14/650	167/18862	0.00196155	0.0458982	0.0399559	LRP2/SFRP1/COL2A1/SOSTDC1/BMP5/SOX11/TGFBR3/GDF5/LEFTY2/PCSK6/GREM1/RGMA/TNMD/CRB2	14
GO:0051962	positive regulation of nervous system development	19/650	263/18862	0.00200183	0.0464145	0.0404054	LRP2/NKX2-2/PTPRZ1/NTRK2/DRD2/SOX11/CHODL/BDNF/SOX8/DCT/RND2/IL34/NLGN1/PAK3/CX3CR1/WNT2/NGFR/KIT/OTP	19
GO:0002065	columnar/cuboidal epithelial cell differentiation	9/650	82/18862	0.00202068	0.0464145	0.0404054	NKX2-2/BMP5/SPDEF/SOX11/FOXA1/FGFR2/NPY/CDH2/RFX3	9
GO:0072210	metanephric nephron development	6/650	39/18862	0.00202439	0.0464145	0.0404054	OSR1/LHX1/IRX1/SOX8/GREM1/CITED1	6
GO:0002675	positive regulation of acute inflammatory response	5/650	27/18862	0.00205748	0.0464145	0.0404054	NPY5R/C2CD4A/FFAR2/CNR1/PTGS2	5
GO:0031069	hair follicle morphogenesis	5/650	27/18862	0.00205748	0.0464145	0.0404054	SOSTDC1/KRT17/FGFR2/BCL2/NGFR	5
GO:0033688	regulation of osteoblast proliferation	5/650	27/18862	0.00205748	0.0464145	0.0404054	SFRP1/FGFR2/SOX8/GREM1/BCL2	5
GO:0048665	neuron fate specification	5/650	27/18862	0.00205748	0.0464145	0.0404054	NKX2-2/MNX1/FOXA1/HOXC10/SIX1	5
GO:0003018	vascular process in circulatory system	18/650	245/18862	0.00216261	0.048291	0.0420389	LRP2/EDN3/C2CD4A/FGB/CHRM3/SLC7A3/LEP/ADRB1/ABCC2/FOXC1/MFSD2A/AZU1/SLC2A10/SLC4A4/FOXC2/ADRA2C/P2RY2/SERPINF2	18
GO:0008016	regulation of heart contraction	18/650	245/18862	0.00216261	0.048291	0.0420389	EDN3/DRD2/CHGA/ADRB1/KCNK3/KCNK1/GNAO1/GSTM2/S100A1/KCNIP1/KCNH2/KCNIP2/KCND3/SCN5A/KCNE5/RYR1/DMD/CORIN	18
GO:0048864	stem cell development	9/650	83/18862	0.00219878	0.0486561	0.0423567	EDN3/SOX11/FOLR1/SOX8/FOXC1/NRTN/FOXC2/CDH2/SEMA6A	9
GO:0023061	signal release	29/650	475/18862	0.00221128	0.0486561	0.0423567	SFRP1/EDN3/KCNC2/DRD2/KMO/ENHO/SOX11/FGB/ADCY1/CHRNB2/LEP/CRHR1/FFAR2/CHGA/SNAP25/SYN2/CNR1/SYN1/IRS2/RIMS1/MAOB/KCNB1/TRIM9/DOC2A/NLGN1/ADRA2C/NNAT/SCT/RFX3	29
GO:0003205	cardiac chamber development	13/650	151/18862	0.00221613	0.0486561	0.0423567	NPY5R/LRP2/BMP5/MED1/SOX11/COL11A1/TGFBR3/FGFR2/FOXC1/FOXC2/MESP1/SCN5A/WNT2	13
GO:0002064	epithelial cell development	16/650	207/18862	0.00224533	0.0486561	0.0423567	HOXB13/NKX2-2/TFCP2L1/BMP5/SPDEF/ONECUT2/FOXA1/POF1B/SOX8/AR/DACT2/TNMD/FOXC2/CDH2/WNT7B/RFX3	16
GO:0034764	positive regulation of transmembrane transport	16/650	207/18862	0.00224533	0.0486561	0.0423567	EDN3/LRRC26/KCNC2/PDZK1/PLP1/RGN/IRS2/RGS9/GSTM2/KLF15/WNK3/KCNH2/KCNIP2/STAC/KCNE5/DMD	16
GO:0034767	positive regulation of ion transmembrane transport	16/650	207/18862	0.00224533	0.0486561	0.0423567	EDN3/LRRC26/KCNC2/PDZK1/PLP1/RGN/IRS2/RGS9/GSTM2/KLF15/WNK3/KCNH2/KCNIP2/STAC/KCNE5/DMD	16
GO:0055074	calcium ion homeostasis	28/650	454/18862	0.00226251	0.0487881	0.0424717	RIC3/EDN3/GRIA1/DRD2/GPR12/SAA1/ATP13A5/RGN/STC2/KCNK3/ATP6V1B1/ATP13A4/SLC25A27/CCKBR/CNR1/GSTM2/EPO/CD24/FGF2/PTGFR/FZD9/JPH3/CX3CR1/RYR1/TACR1/BCL2/DMD/OPRL1	28
GO:0071634	regulation of transforming growth factor beta production	6/650	40/18862	0.00231339	0.0491892	0.0428208	ITGB6/FERMT1/ITGB8/CD24/PTGS2/SERPINF2	6
GO:0090190	positive regulation of branching involved in ureteric bud morphogenesis	4/650	17/18862	0.00232393	0.0491892	0.0428208	LHX1/SOX8/GREM1/SIX1	4
GO:0035107	appendage morphogenesis	12/650	134/18862	0.00232583	0.0491892	0.0428208	COL2A1/OSR1/FREM2/MED1/SOX11/GDF5/FGFR2/ALX4/ZBTB16/GREM1/HOXC10/DLX6	12
GO:0035108	limb morphogenesis	12/650	134/18862	0.00232583	0.0491892	0.0428208	COL2A1/OSR1/FREM2/MED1/SOX11/GDF5/FGFR2/ALX4/ZBTB16/GREM1/HOXC10/DLX6	12
GO:0048738	cardiac muscle tissue development	16/650	208/18862	0.0023571	0.049253	0.0428764	TCAP/LRP2/BMP5/MED1/COL11A1/TGFBR3/PI16/FGFR2/FOXC1/GREM1/FGF2/FOXC2/SOX6/MESP1/SORBS2/WNT2	16
GO:0030072	peptide hormone secretion	18/650	247/18862	0.00236244	0.049253	0.0428764	SFRP1/EDN3/KCNC2/DRD2/ENHO/FGB/LEP/CRHR1/FFAR2/CHGA/SNAP25/CNR1/IRS2/KCNB1/ADRA2C/NNAT/SCT/RFX3	18
GO:0051896	regulation of protein kinase B signaling	18/650	247/18862	0.00236244	0.049253	0.0428764	ERBB2/LRP2/FGFR4/NTRK2/NTRK3/DRD2/LEP/FGFR2/IRS2/CHI3L1/FGF9/LIN28A/NRG2/FGF2/EPGN/CX3CR1/FGF17/KIT	18
GO:0042475	odontogenesis of dentin-containing tooth	9/650	84/18862	0.00238916	0.049575	0.0431566	SOSTDC1/ITGB6/MMP20/EDAR/FOXC1/GNAO1/KLK4/SCN5A/NGFR	9
GO:0048732	gland development	26/650	413/18862	0.00242124	0.0495971	0.0431759	HOXB13/SFRP1/SOSTDC1/TFCP2L1/MED1/DRD2/SERPINB5/ONECUT2/FOXA1/RGN/TGFBR3/CSN3/FGFR2/FA2H/EDAR/CCKBR/FOXC1/AR/IRS2/TPH1/MESP1/WNT7B/SIX1/WNT2/BCL2/OTP	26
GO:0030199	collagen fibril organization	7/650	54/18862	0.00242405	0.0495971	0.0431759	COL2A1/COL11A1/FOXC1/MMP11/GREM1/FOXC2/SERPINF2	7
GO:0097479	synaptic vesicle localization	7/650	54/18862	0.00242405	0.0495971	0.0431759	SYN2/SNAP91/SYN1/KIF5A/AP3B2/CDH2/NLGN1	7
GO:0090276	regulation of peptide hormone secretion	16/650	209/18862	0.00247347	0.0503741	0.0438523	SFRP1/KCNC2/DRD2/ENHO/FGB/LEP/FFAR2/CHGA/SNAP25/CNR1/IRS2/KCNB1/ADRA2C/NNAT/SCT/RFX3	16
GO:0051146	striated muscle cell differentiation	19/650	269/18862	0.00257955	0.0522923	0.0455221	CEACAM5/TCAP/RBM24/DNER/PI16/SMYD1/BDNF/MYOZ1/GREM1/SOX6/MESP1/CDH2/SORBS2/SIX1/CDON/RYR1/OBSCN/BCL2/DMD	19
GO:0030850	prostate gland development	6/650	41/18862	0.00263238	0.0526357	0.0458211	HOXB13/SFRP1/SERPINB5/FOXA1/FGFR2/AR	6
GO:0051180	vitamin transport	6/650	41/18862	0.00263238	0.0526357	0.0458211	LRP2/FOLR1/SLC19A3/SLC52A1/SLC2A10/AMN	6
GO:0090278	negative regulation of peptide hormone secretion	6/650	41/18862	0.00263238	0.0526357	0.0458211	SFRP1/DRD2/ENHO/LEP/CHGA/KCNB1	6
GO:0007405	neuroblast proliferation	7/650	55/18862	0.00269665	0.0536768	0.0467274	DRD2/ARTN/FGFR2/DCT/FZD9/CX3CR1/OTP	7
GO:0071560	cellular response to transforming growth factor beta stimulus	18/650	251/18862	0.00280874	0.0553135	0.0481522	SFRP1/ITGB6/SOX11/ONECUT2/FERMT1/CIDEA/TGFBR3/FOLR1/GDF5/FGFR2/ITGB8/LEFTY2/DUSP15/SLC2A10/CITED1/SOX6/CX3CR1/WNT2	18
GO:0051952	regulation of amine transport	9/650	86/18862	0.00280907	0.0553135	0.0481522	NPY5R/DRD2/KMO/CHRNB2/LEP/CHGA/CNR1/KCNB1/ADRA2C	9
GO:0009914	hormone transport	21/650	312/18862	0.0028166	0.0553135	0.0481522	SFRP1/EDN3/KCNC2/DRD2/ENHO/SOX11/FGB/CRYM/LEP/CRHR1/FFAR2/CHGA/SNAP25/ABCC2/CNR1/IRS2/KCNB1/ADRA2C/NNAT/SCT/RFX3	21
GO:0002523	leukocyte migration involved in inflammatory response	4/650	18/18862	0.00290728	0.0557706	0.0485501	S100A8/LBP/S100A9/FFAR2	4
GO:0072077	renal vesicle morphogenesis	4/650	18/18862	0.00290728	0.0557706	0.0485501	LHX1/SOX8/GREM1/CITED1	4
GO:0072189	ureter development	4/650	18/18862	0.00290728	0.0557706	0.0485501	OSR1/LHX1/SOX8/SIX1	4
GO:0097623	potassium ion export across plasma membrane	4/650	18/18862	0.00290728	0.0557706	0.0485501	KCNH2/KCNIP2/KCND3/KCNE5	4
GO:2000696	regulation of epithelial cell differentiation involved in kidney development	4/650	18/18862	0.00290728	0.0557706	0.0485501	OSR1/LHX1/CD24/CITED1	4
GO:0032414	positive regulation of ion transmembrane transporter activity	10/650	103/18862	0.00292427	0.0557706	0.0485501	LRRC26/KCNC2/PDZK1/RGN/RGS9/GSTM2/WNK3/KCNIP2/STAC/DMD	10
GO:0015711	organic anion transport	24/650	376/18862	0.00292862	0.0557706	0.0485501	NPY5R/LRP2/ABCC11/NTRK2/SLC6A15/CA3/DRD2/CA6/KMO/SLC16A11/SLC7A3/LEP/FOLR1/SNAP25/ABCC2/SLCO1A2/SLC25A18/RIMS1/SLC52A1/MFSD2A/SLC2A10/SLC13A5/SLC4A4/PLA2G4F	24
GO:0071604	transforming growth factor beta production	6/650	42/18862	0.00298324	0.0564918	0.0491779	ITGB6/FERMT1/ITGB8/CD24/PTGS2/SERPINF2	6
GO:0019748	secondary metabolic process	7/650	56/18862	0.00299218	0.0564918	0.0491779	OCA2/AKR1B10/ABCC2/DCT/CITED1/FMO2/BCL2	7
GO:0006874	cellular calcium ion homeostasis	27/650	442/18862	0.00306417	0.0576037	0.0501459	RIC3/EDN3/GRIA1/DRD2/GPR12/SAA1/ATP13A5/RGN/STC2/KCNK3/ATP13A4/SLC25A27/CCKBR/CNR1/GSTM2/EPO/CD24/FGF2/PTGFR/FZD9/JPH3/CX3CR1/RYR1/TACR1/BCL2/DMD/OPRL1	27
GO:0009100	glycoprotein metabolic process	26/650	421/18862	0.00313404	0.0586665	0.0510711	MUCL1/B4GALNT2/COL2A1/PTX3/CHST4/MUC19/HS6ST3/CHST9/FUT3/COL11A1/BCAN/LEP/GAL3ST2/PCSK6/NEU4/ABO/HS3ST4/FBXO2/DPY19L2/SLC2A10/ST6GALNAC1/MUC21/EXTL1/GALNT6/BCL2/GALNT3	26
GO:0071295	cellular response to vitamin	5/650	30/18862	0.00333583	0.0618707	0.0538605	SFRP1/CYP24A1/MED1/LEP/FOLR1	5
GO:0090183	regulation of kidney development	5/650	30/18862	0.00333583	0.0618707	0.0538605	OSR1/LHX1/SOX8/GREM1/SIX1	5
GO:0099504	synaptic vesicle cycle	14/650	177/18862	0.0033474	0.0618707	0.0538605	DRD2/ADCY1/SNAP25/SYN2/SNAP91/CNR1/SYN1/RIMS1/BSN/TRIM9/DOC2A/CDH2/NLGN1/DNAJC6	14
GO:0060193	positive regulation of lipase activity	8/650	73/18862	0.00356679	0.0656499	0.0571504	NTRK2/NTRK3/BDNF/FGFR2/FGF2/NMUR1/NTF3/KIT	8
GO:0071559	response to transforming growth factor beta	18/650	257/18862	0.00360854	0.0661415	0.0575784	SFRP1/ITGB6/SOX11/ONECUT2/FERMT1/CIDEA/TGFBR3/FOLR1/GDF5/FGFR2/ITGB8/LEFTY2/DUSP15/SLC2A10/CITED1/SOX6/CX3CR1/WNT2	18
GO:0043271	negative regulation of ion transport	21/650	319/18862	0.00364857	0.0662006	0.0576298	NPY5R/SFRP1/OSR1/DRD2/ENHO/FERMT1/LEP/CRHR1/CHGA/GNAO1/CNR1/IRS2/GSTM2/EPO/MAOB/WNK3/KCNH2/KCNB1/ADRA2C/KCNE5/BCL2	21
GO:0060675	ureteric bud morphogenesis	7/650	58/18862	0.00365691	0.0662006	0.0576298	LHX1/SOX8/GREM1/FGF2/CITED1/SIX1/BCL2	7
GO:0061005	cell differentiation involved in kidney development	7/650	58/18862	0.00365691	0.0662006	0.0576298	OSR1/LHX1/KLF15/CD24/GREM1/CITED1/FOXC2	7
GO:0044344	cellular response to fibroblast growth factor stimulus	12/650	142/18862	0.00375106	0.0676266	0.0588712	SFRP1/FGFR4/LHX1/POLR2F/FGFBP1/FGFR2/FGF9/CREB3L1/FGF2/FGF17/NGFR/GALNT3	12
GO:0048066	developmental pigmentation	6/650	44/18862	0.00378826	0.0680186	0.0592124	EDN3/OCA2/DCT/CITED1/BCL2/KIT	6
GO:0014068	positive regulation of phosphatidylinositol 3-kinase signaling	9/650	90/18862	0.00382279	0.0680331	0.059225	NTRK2/NTRK3/SERPINA12/LEP/IRS2/EPO/FGF2/NTF3/KIT	9
GO:0048704	embryonic skeletal system morphogenesis	9/650	90/18862	0.00382279	0.0680331	0.059225	COL2A1/OSR1/LHX1/SOX11/COL11A1/FGFR2/ALX4/FOXC2/SIX1	9
GO:0060047	heart contraction	19/650	279/18862	0.00385079	0.0680331	0.059225	TCAP/EDN3/DRD2/CHGA/ADRB1/KCNK3/KCNK1/GNAO1/GSTM2/S100A1/KCNIP1/KCNH2/KCNIP2/KCND3/SCN5A/KCNE5/RYR1/DMD/CORIN	19
GO:0007613	memory	10/650	107/18862	0.00385539	0.0680331	0.059225	GRIA1/DRD2/ADCY1/CHRNB2/BDNF/NETO1/CNR1/JPH3/CX3CR1/NTF3	10
GO:0003338	metanephros morphogenesis	5/650	31/18862	0.00386639	0.0680331	0.059225	LHX1/SOX8/GREM1/CITED1/WNT7B	5
GO:0050673	epithelial cell proliferation	26/650	428/18862	0.00389642	0.0682882	0.0594471	ERBB2/SFRP1/OSR1/BMP5/MED1/SERPINB5/SDR16C5/SOX11/FERMT1/RGN/TGFBR3/LEP/GDF5/FGFBP1/FGFR2/AR/FGF9/TNMD/FGF2/DLX6/EPGN/SIX1/SCN5A/WNT2/NGFR/KIT	26
GO:0007189	adenylate cyclase-activating G protein-coupled receptor signaling pathway	12/650	143/18862	0.0039702	0.0691992	0.0602402	DRD2/GPR12/ADCY1/CRHR1/CHGA/ADRB1/CNR1/MC5R/PTGFR/MRAP/ADRA2C/MRAP2	12
GO:0048565	digestive tract development	11/650	125/18862	0.00397986	0.0691992	0.0602402	NKX2-2/SFRP1/SPDEF/SOX11/FGFR2/CCKBR/ALX4/NPY/BCL2/KIT/SCT	11
GO:0008343	adult feeding behavior	3/650	10/18862	0.00407748	0.0695227	0.0605218	DMBX1/LEP/NPY	3
GO:0032525	somite rostral/caudal axis specification	3/650	10/18862	0.00407748	0.0695227	0.0605218	LHX1/MESP1/RIPPLY2	3
GO:0033148	positive regulation of intracellular estrogen receptor signaling pathway	3/650	10/18862	0.00407748	0.0695227	0.0605218	MED1/FOXA1/AR	3
GO:0048755	branching morphogenesis of a nerve	3/650	10/18862	0.00407748	0.0695227	0.0605218	DRD2/BCL11A/FGFR2	3
GO:0099550	trans-synaptic signaling, modulating synaptic transmission	3/650	10/18862	0.00407748	0.0695227	0.0605218	NTRK2/CNR1/EFNB3	3
GO:0003009	skeletal muscle contraction	6/650	45/18862	0.00424629	0.0718439	0.0625425	TCAP/GSTM2/CHRNA1/STAC/MB/DMD	6
GO:0031018	endocrine pancreas development	6/650	45/18862	0.00424629	0.0718439	0.0625425	NKX2-2/MNX1/BMP5/ONECUT2/CDH2/RFX3	6
GO:0001502	cartilage condensation	4/650	20/18862	0.00435855	0.0725785	0.063182	COL2A1/OTOR/COL11A1/SOX6	4
GO:0003323	type B pancreatic cell development	4/650	20/18862	0.00435855	0.0725785	0.063182	NKX2-2/BMP5/CDH2/RFX3	4
GO:0090189	regulation of branching involved in ureteric bud morphogenesis	4/650	20/18862	0.00435855	0.0725785	0.063182	LHX1/SOX8/GREM1/SIX1	4
GO:0007588	excretion	7/650	60/18862	0.00442828	0.0725785	0.063182	DRD2/SCNN1G/CHRNB2/ATP6V1B1/CLDN16/AMN/CORIN	7
GO:0046530	photoreceptor cell differentiation	7/650	60/18862	0.00442828	0.0725785	0.063182	DCX/NTRK2/SOX8/MFSD2A/CRB1/SDK2/CRB2	7
GO:0009072	aromatic amino acid family metabolic process	5/650	32/18862	0.00445469	0.0725785	0.063182	IYD/KMO/HGD/TPH1/DCT	5
GO:0010453	regulation of cell fate commitment	5/650	32/18862	0.00445469	0.0725785	0.063182	SOSTDC1/SPDEF/AR/FGF2/MESP1	5
GO:0031128	developmental induction	5/650	32/18862	0.00445469	0.0725785	0.063182	SOX8/AR/MESP1/SIX1/WNT2	5
GO:0033687	osteoblast proliferation	5/650	32/18862	0.00445469	0.0725785	0.063182	SFRP1/FGFR2/SOX8/GREM1/BCL2	5
GO:0048011	neurotrophin TRK receptor signaling pathway	5/650	32/18862	0.00445469	0.0725785	0.063182	NTRK2/NTRK3/BDNF/NTF3/NGFR	5
GO:0035637	multicellular organismal signaling	15/650	203/18862	0.00462657	0.0748246	0.0651373	CNTNAP2/NTRK2/KCNK3/KCNK1/KCNIP1/CLDN19/KCNH2/KCNIP2/CHRNA1/KCND3/SCN5A/KCNE5/RYR1/SCN3A/CORIN	15
GO:0050679	positive regulation of epithelial cell proliferation	15/650	203/18862	0.00462657	0.0748246	0.0651373	ERBB2/SFRP1/OSR1/BMP5/MED1/SOX11/FGFBP1/FGFR2/AR/FGF9/FGF2/DLX6/EPGN/SCN5A/WNT2	15
GO:0007631	feeding behavior	9/650	93/18862	0.00475545	0.0763476	0.0664631	NPY5R/NPY1R/NTRK2/DRD2/DMBX1/LEP/CNR1/NPY/MRAP2	9
GO:0051153	regulation of striated muscle cell differentiation	9/650	93/18862	0.00475545	0.0763476	0.0664631	CEACAM5/RBM24/PI16/SMYD1/BDNF/GREM1/SOX6/MESP1/BCL2	9
GO:0050767	regulation of neurogenesis	22/650	348/18862	0.00479401	0.0766868	0.0667584	LRP2/NKX2-2/PTPRZ1/NTRK2/DRD2/SOX11/CHODL/BDNF/SOX8/LIN28A/DCT/DLL3/RND2/IL34/PAK3/EFNB3/CX3CR1/WNT2/NGFR/KIT/SEMA6A/OTP	22
GO:0048645	animal organ formation	7/650	61/18862	0.00485714	0.0774151	0.0673924	LRP2/FOLR1/FGFR2/AR/MESP1/SIX1/WNT2	7
GO:0007043	cell-cell junction assembly	12/650	147/18862	0.00495182	0.0784008	0.0682505	DSG1/CDH19/UGT8/POF1B/GJB1/CLDN16/CLDN19/CDHR3/FRMPD2/CDH2/CDH12/CDH20	12
GO:0002088	lens development in camera-type eye	8/650	77/18862	0.00495463	0.0784008	0.0682505	MED1/SOX11/CRYAB/FGF2/WNT7B/BIRC7/CDON/WNT2	8
GO:0022612	gland morphogenesis	10/650	111/18862	0.00500689	0.0789437	0.0687231	HOXB13/SFRP1/SOSTDC1/MED1/SERPINB5/FOXA1/FGFR2/EDAR/AR/BCL2	10
GO:0015837	amine transport	9/650	94/18862	0.00510273	0.0790497	0.0688153	NPY5R/DRD2/KMO/CHRNB2/LEP/CHGA/CNR1/KCNB1/ADRA2C	9
GO:0045666	positive regulation of neuron differentiation	9/650	94/18862	0.00510273	0.0790497	0.0688153	NKX2-2/NEUROD2/SOX11/FOXA1/GDF5/EPO/LIN28A/ADRA2C/CDON	9
GO:0061097	regulation of protein tyrosine kinase activity	9/650	94/18862	0.00510273	0.0790497	0.0688153	NTRK2/CBLC/BDNF/CD24/GREM1/DOK7/IL34/EPGN/SRCIN1	9
GO:0032941	secretion by tissue	5/650	33/18862	0.00510401	0.0790497	0.0688153	CHRM3/CELSR2/NLRP6/SCT/P2RY2	5
GO:0007409	axonogenesis	27/650	460/18862	0.00522273	0.0790497	0.0688153	ERBB2/GRB7/NTRK2/LGR6/LHX1/S100B/DRD2/ARTN/UNC5A/CHODL/ADCY1/CHRNB2/ARX/BDNF/FGFR2/IRS2/LAMA3/NRTN/KIF5A/RND2/CDH2/PAK3/EFNB3/MYOT/BCL2/NGFR/SEMA6A	27
GO:0071774	response to fibroblast growth factor	12/650	148/18862	0.00522518	0.0790497	0.0688153	SFRP1/FGFR4/LHX1/POLR2F/FGFBP1/FGFR2/FGF9/CREB3L1/FGF2/FGF17/NGFR/GALNT3	12
GO:0001759	organ induction	4/650	21/18862	0.00523934	0.0790497	0.0688153	AR/MESP1/SIX1/WNT2	4
GO:0002052	positive regulation of neuroblast proliferation	4/650	21/18862	0.00523934	0.0790497	0.0688153	DRD2/DCT/CX3CR1/OTP	4
GO:0002053	positive regulation of mesenchymal cell proliferation	4/650	21/18862	0.00523934	0.0790497	0.0688153	FGFR2/IRS2/SIX1/WNT2	4
GO:0042749	regulation of circadian sleep/wake cycle	4/650	21/18862	0.00523934	0.0790497	0.0688153	DRD2/CHRNB2/ADRB1/NLGN1	4
GO:0048736	appendage development	13/650	167/18862	0.00526248	0.0790497	0.0688153	COL2A1/OSR1/FREM2/MED1/SOX11/RSPO4/GDF5/FGFR2/ALX4/ZBTB16/GREM1/HOXC10/DLX6	13
GO:0050954	sensory perception of mechanical stimulus	13/650	167/18862	0.00526248	0.0790497	0.0688153	LRP2/COL2A1/OTOR/EPYC/CRYM/COL11A1/CHRNB2/TMPRSS3/ATP6V1B1/DCDC2/SIX1/TMIE/KIT	13
GO:0060173	limb development	13/650	167/18862	0.00526248	0.0790497	0.0688153	COL2A1/OSR1/FREM2/MED1/SOX11/RSPO4/GDF5/FGFR2/ALX4/ZBTB16/GREM1/HOXC10/DLX6	13
GO:0007157	heterophilic cell-cell adhesion via plasma membrane cell adhesion molecules	6/650	47/18862	0.00528316	0.0790497	0.0688153	CEACAM6/CEACAM5/CRB1/CDH2/NLGN1/CRB2	6
GO:0030574	collagen catabolic process	6/650	47/18862	0.00528316	0.0790497	0.0688153	MMP1/KLK6/MMP13/MMP20/MMP11/MMP24	6
GO:0032835	glomerulus development	7/650	62/18862	0.00531653	0.0792793	0.0690153	OSR1/LHX1/FOXC1/KLF15/CD24/FOXC2/BCL2	7
GO:0010623	programmed cell death involved in cell development	3/650	11/18862	0.00546405	0.0809305	0.0704526	DNASE1L3/BCL2/KIT	3
GO:0060174	limb bud formation	3/650	11/18862	0.00546405	0.0809305	0.0704526	COL2A1/SOX11/FGFR2	3
GO:0050678	regulation of epithelial cell proliferation	23/650	374/18862	0.00553999	0.0817799	0.0711921	ERBB2/SFRP1/OSR1/BMP5/MED1/SERPINB5/SOX11/RGN/TGFBR3/LEP/GDF5/FGFBP1/FGFR2/AR/FGF9/TNMD/FGF2/DLX6/EPGN/SIX1/SCN5A/WNT2/NGFR	23
GO:0003015	heart process	19/650	289/18862	0.00560312	0.0824352	0.0717626	TCAP/EDN3/DRD2/CHGA/ADRB1/KCNK3/KCNK1/GNAO1/GSTM2/S100A1/KCNIP1/KCNH2/KCNIP2/KCND3/SCN5A/KCNE5/RYR1/DMD/CORIN	19
GO:0008543	fibroblast growth factor receptor signaling pathway	10/650	113/18862	0.00567566	0.0832241	0.0724493	FGFR4/POLR2F/FGFBP1/FGFR2/FGF9/CREB3L1/FGF2/FGF17/NGFR/GALNT3	10
GO:0015844	monoamine transport	8/650	79/18862	0.00578728	0.0836323	0.0728046	DRD2/CHRNB2/CHGA/CNR1/MAOB/SLC6A2/KCNB1/ADRA2C	8
GO:0030104	water homeostasis	8/650	79/18862	0.00578728	0.0836323	0.0728046	ABCA12/ADCY1/KRT16/SCNN1G/FA2H/ATP6V1B1/AQP4/SCT	8
GO:0035137	hindlimb morphogenesis	5/650	34/18862	0.00581757	0.0836323	0.0728046	OSR1/MED1/GDF5/ALX4/ZBTB16	5
GO:0043276	anoikis	5/650	34/18862	0.00581757	0.0836323	0.0728046	CEACAM6/CEACAM5/NTRK2/PDK4/BCL2	5
GO:0050931	pigment cell differentiation	5/650	34/18862	0.00581757	0.0836323	0.0728046	EDN3/OCA2/CITED1/BCL2/KIT	5
GO:0060428	lung epithelium development	5/650	34/18862	0.00581757	0.0836323	0.0728046	SPDEF/FOXA1/FGFR2/WNT7B/WNT2	5
GO:0002673	regulation of acute inflammatory response	6/650	48/18862	0.00586592	0.0840527	0.0731707	NPY5R/C2CD4A/FFAR2/CNR1/PTGS2/DNASE1L3	6
GO:0001838	embryonic epithelial tube formation	10/650	114/18862	0.00603518	0.0861973	0.0750375	LRP2/SFRP1/OSR1/BMP5/IRX1/SOX11/FOLR1/SOX8/GREM1/SIX1	10
GO:0006582	melanin metabolic process	4/650	22/18862	0.00623169	0.0880281	0.0766313	OCA2/DCT/CITED1/BCL2	4
GO:0051590	positive regulation of neurotransmitter transport	4/650	22/18862	0.00623169	0.0880281	0.0766313	DRD2/KMO/CNR1/NLGN1	4
GO:0001942	hair follicle development	8/650	80/18862	0.00624153	0.0880281	0.0766313	SOSTDC1/FERMT1/KRT17/FGFR2/EDAR/ALX4/BCL2/NGFR	8
GO:0007188	adenylate cyclase-modulating G protein-coupled receptor signaling pathway	16/650	230/18862	0.00625563	0.0880281	0.0766313	NPY1R/DRD2/GPR12/CHRM3/ADCY1/CRHR1/CHGA/ADRB1/GNAO1/CNR1/MC5R/PTGFR/MRAP/ADRA2C/MRAP2/OPRL1	16
GO:0046545	development of primary female sexual characteristics	9/650	97/18862	0.00626342	0.0880281	0.0766313	SFRP1/PTX3/LEP/FOXC1/DACH2/GAS2/PCYT1B/BCL2/KIT	9
GO:0035725	sodium ion transmembrane transport	13/650	171/18862	0.00639791	0.0895468	0.0779534	SLC9A2/OSR1/SLC6A15/SCNN1G/KCNK1/NETO1/SLC6A2/WNK3/SLC4A4/SCN5A/SCN3A/DMD/ATP12A	13
GO:0048593	camera-type eye morphogenesis	10/650	115/18862	0.00641219	0.0895468	0.0779534	NTRK2/LHX1/SOX11/SOX8/MFSD2A/CRB1/SDK2/CDON/CRB2/WNT2	10
GO:0006865	amino acid transport	12/650	152/18862	0.00644104	0.089665	0.0780563	NPY5R/NTRK2/SLC6A15/OCA2/KMO/SLC7A4/SLC7A3/LEP/SNAP25/SLC25A18/RIMS1/SLC38A4	12
GO:0045661	regulation of myoblast differentiation	6/650	49/18862	0.00649418	0.0901196	0.0784521	SOSTDC1/RBM24/SMYD1/SOX8/CMTM5/CDON	6
GO:0046676	negative regulation of insulin secretion	5/650	35/18862	0.00659857	0.0912802	0.0794624	SFRP1/DRD2/ENHO/CHGA/KCNB1	5
GO:0055123	digestive system development	11/650	134/18862	0.00669666	0.0921231	0.0801962	NKX2-2/SFRP1/SPDEF/SOX11/FGFR2/CCKBR/ALX4/NPY/BCL2/KIT/SCT	11
GO:0043491	protein kinase B signaling	18/650	273/18862	0.00670172	0.0921231	0.0801962	ERBB2/LRP2/FGFR4/NTRK2/NTRK3/DRD2/LEP/FGFR2/IRS2/CHI3L1/FGF9/LIN28A/NRG2/FGF2/EPGN/CX3CR1/FGF17/KIT	18
GO:0021954	central nervous system neuron development	8/650	81/18862	0.00672233	0.0921231	0.0801962	NTRK2/DRD2/CHRNB2/LEP/ARX/FGFR2/NANOS1/NPY	8
GO:0008406	gonad development	15/650	212/18862	0.00685191	0.0936073	0.0814882	LRP2/SFRP1/OSR1/PTX3/LEP/TEX19/SOX8/FOXC1/AR/FGF9/ADAM29/GAS2/PCYT1B/BCL2/KIT	15
GO:0001890	placenta development	11/650	135/18862	0.00707117	0.0946865	0.0824277	BMP5/MED1/LEP/STC2/FGFR2/NDP/TEX19/ITGB8/CITED1/WNT7B/WNT2	11
GO:0043524	negative regulation of neuron apoptotic process	11/650	135/18862	0.00707117	0.0946865	0.0824277	PTPRZ1/NTRK2/FAIM2/GDF5/BDNF/CITED1/FZD9/SIX1/CX3CR1/BCL2/NTF3	11
GO:0006570	tyrosine metabolic process	3/650	12/18862	0.00710058	0.0946865	0.0824277	IYD/HGD/DCT	3
GO:0010454	negative regulation of cell fate commitment	3/650	12/18862	0.00710058	0.0946865	0.0824277	SOSTDC1/SPDEF/MESP1	3
GO:0031581	hemidesmosome assembly	3/650	12/18862	0.00710058	0.0946865	0.0824277	KRT14/KRT5/LAMA3	3
GO:0033145	positive regulation of intracellular steroid hormone receptor signaling pathway	3/650	12/18862	0.00710058	0.0946865	0.0824277	MED1/FOXA1/AR	3
GO:0060442	branching involved in prostate gland morphogenesis	3/650	12/18862	0.00710058	0.0946865	0.0824277	HOXB13/SFRP1/FGFR2	3
GO:0030509	BMP signaling pathway	12/650	154/18862	0.00712748	0.0946865	0.0824277	LRP2/SFRP1/SOSTDC1/BMP5/SOX11/TGFBR3/GDF5/LEFTY2/PCSK6/GREM1/RGMA/CRB2	12
GO:0050731	positive regulation of peptidyl-tyrosine phosphorylation	14/650	193/18862	0.00714615	0.0946865	0.0824277	NTRK2/LEP/HPX/BDNF/TSLP/EPO/CD24/GREM1/DOK7/IL34/EPGN/SRCIN1/NTF3/KIT	14
GO:0060348	bone development	14/650	193/18862	0.00714615	0.0946865	0.0824277	COL2A1/EPYC/MED1/ITGB6/RGN/LEP/FGFR2/MMP13/FOXC1/GREM1/COL27A1/RIPPLY2/RYR1/KIT	14
GO:0048706	embryonic skeletal system development	10/650	117/18862	0.00722092	0.0953899	0.08304	COL2A1/OSR1/LHX1/SOX11/COL11A1/FGFR2/ALX4/SLC2A10/FOXC2/SIX1	10
GO:0002021	response to dietary excess	4/650	23/18862	0.00734134	0.0961147	0.083671	PCSK1N/LEP/ADRB1/SCT	4
GO:0022410	circadian sleep/wake cycle process	4/650	23/18862	0.00734134	0.0961147	0.083671	DRD2/CHRNB2/ADRB1/NLGN1	4
GO:0098743	cell aggregation	4/650	23/18862	0.00734134	0.0961147	0.083671	COL2A1/OTOR/COL11A1/SOX6	4
GO:0099003	vesicle-mediated transport in synapse	14/650	194/18862	0.00746644	0.0974625	0.0848443	DRD2/ADCY1/SNAP25/SYN2/SNAP91/CNR1/SYN1/RIMS1/BSN/TRIM9/DOC2A/CDH2/NLGN1/DNAJC6	14
GO:0042692	muscle cell differentiation	22/650	362/18862	0.00751534	0.0978106	0.0851473	CEACAM5/TCAP/RBM24/DNER/PI16/SMYD1/BDNF/FGFR2/FGF9/MYOZ1/GREM1/SOX6/MESP1/CDH2/SORBS2/SIX1/CDON/RYR1/OBSCN/BCL2/DMD/KIT	22
GO:0006939	smooth muscle contraction	9/650	100/18862	0.00761722	0.0985533	0.0857939	ORMDL3/EDN3/DRD2/CHRM3/CHRNB2/NMUR1/ADRA2C/TACR1/KIT	9
GO:0060419	heart growth	9/650	100/18862	0.00761722	0.0985533	0.0857939	TGFBR3/PI16/FGFR2/FOXC1/FGF2/FOXC2/MESP1/SORBS2/WNT2	9
GO:0022404	molting cycle process	8/650	83/18862	0.00776734	0.099908	0.0869732	SOSTDC1/FERMT1/KRT17/FGFR2/EDAR/ALX4/BCL2/NGFR	8
GO:0022405	hair cycle process	8/650	83/18862	0.00776734	0.099908	0.0869732	SOSTDC1/FERMT1/KRT17/FGFR2/EDAR/ALX4/BCL2/NGFR	8
GO:2000027	regulation of animal organ morphogenesis	13/650	176/18862	0.00808217	0.103654	0.0902346	SFRP1/PSMD3/LHX1/SOX8/AR/PAX9/GREM1/MESP1/CELSR2/SP6/SIX1/WNT2/NGFR	13
GO:0007586	digestion	11/650	138/18862	0.00829347	0.106055	0.0923245	MGAM/CHRM3/SERPINA3/LEP/ARX/CCKBR/LCT/CAPN9/CYP39A1/SCT/PRSS3	11
GO:0098773	skin epidermis development	8/650	84/18862	0.00833347	0.106258	0.0925008	SOSTDC1/FERMT1/KRT17/FGFR2/EDAR/ALX4/BCL2/NGFR	8
GO:0099622	cardiac muscle cell membrane repolarization	5/650	37/18862	0.00837532	0.106483	0.0926967	KCNH2/KCNIP2/KCND3/SCN5A/KCNE5	5
GO:0003309	type B pancreatic cell differentiation	4/650	24/18862	0.00857367	0.107829	0.0938684	NKX2-2/BMP5/CDH2/RFX3	4
GO:0045109	intermediate filament organization	4/650	24/18862	0.00857367	0.107829	0.0938684	KRT14/KRT17/GFAP/KRT20	4
GO:0072010	glomerular epithelium development	4/650	24/18862	0.00857367	0.107829	0.0938684	FOXC1/KLF15/CD24/FOXC2	4
GO:0006805	xenobiotic metabolic process	10/650	120/18862	0.00857923	0.107829	0.0938684	UGT2B11/UGT2B28/ALDH3A1/ABCC2/GSTM2/NAT2/GLYAT/GGT1/FMO2/NR1I2	10
GO:0050433	regulation of catecholamine secretion	6/650	52/18862	0.00867134	0.108676	0.0946059	DRD2/CHRNB2/CHGA/CNR1/KCNB1/ADRA2C	6
GO:1903531	negative regulation of secretion by cell	11/650	139/18862	0.00873536	0.109006	0.0948934	NPY5R/SFRP1/DRD2/ENHO/LEP/CHGA/CNR1/MAOB/KCNB1/TRIM9/ADRA2C	11
GO:0097529	myeloid leukocyte migration	15/650	218/18862	0.0087619	0.109006	0.0948934	S100A7/CXCL17/EDN3/S100A8/SAA1/LBP/S100A9/CHGA/GREM1/AZU1/IL34/CXCL2/UMODL1/CX3CR1/KIT	15
GO:0051937	catecholamine transport	7/650	68/18862	0.00878714	0.109006	0.0948934	DRD2/CHRNB2/CHGA/CNR1/SLC6A2/KCNB1/ADRA2C	7
GO:0046879	hormone secretion	19/650	302/18862	0.00880761	0.109006	0.0948934	SFRP1/EDN3/KCNC2/DRD2/ENHO/SOX11/FGB/LEP/CRHR1/FFAR2/CHGA/SNAP25/CNR1/IRS2/KCNB1/ADRA2C/NNAT/SCT/RFX3	19
GO:0015718	monocarboxylic acid transport	13/650	178/18862	0.00884637	0.109006	0.0948934	NPY5R/ABCC11/NTRK2/DRD2/KMO/SLC16A11/LEP/SNAP25/ABCC2/SLCO1A2/SLC25A18/RIMS1/PLA2G4F	13
GO:0050796	regulation of insulin secretion	13/650	178/18862	0.00884637	0.109006	0.0948934	SFRP1/KCNC2/DRD2/ENHO/LEP/CHGA/SNAP25/CNR1/IRS2/KCNB1/ADRA2C/NNAT/RFX3	13
GO:0048568	embryonic organ development	24/650	412/18862	0.00891277	0.109518	0.0953386	TCAP/COL2A1/OSR1/LHX1/BMP5/MED1/SOX11/COL11A1/FOLR1/FGFR2/ATP6V1B1/FOXC1/ALX4/CITED1/DLX6/FOXC2/MESP1/WNT7B/SIX1/CRB2/WNT2/TMIE/KIT/SCT	24
GO:0033689	negative regulation of osteoblast proliferation	3/650	13/18862	0.008997	0.109634	0.0954398	SFRP1/GREM1/BCL2	3
GO:0042659	regulation of cell fate specification	3/650	13/18862	0.008997	0.109634	0.0954398	AR/FGF2/MESP1	3
GO:0072182	regulation of nephron tubule epithelial cell differentiation	3/650	13/18862	0.008997	0.109634	0.0954398	OSR1/LHX1/CD24	3
GO:0038179	neurotrophin signaling pathway	5/650	38/18862	0.00937711	0.113942	0.0991898	NTRK2/NTRK3/BDNF/NTF3/NGFR	5
GO:0021675	nerve development	7/650	69/18862	0.00949688	0.113942	0.0991898	NKX2-2/CHRNB2/BDNF/NRTN/SIX1/NTF3/NGFR	7
GO:0001541	ovarian follicle development	6/650	53/18862	0.00950089	0.113942	0.0991898	PTX3/FOXC1/GAS2/PCYT1B/BCL2/KIT	6
GO:0048747	muscle fiber development	6/650	53/18862	0.00950089	0.113942	0.0991898	TCAP/DNER/SIX1/RYR1/BCL2/DMD	6
GO:0050432	catecholamine secretion	6/650	53/18862	0.00950089	0.113942	0.0991898	DRD2/CHRNB2/CHGA/CNR1/KCNB1/ADRA2C	6
GO:0051048	negative regulation of secretion	12/650	160/18862	0.00953667	0.113942	0.0991898	NPY5R/SFRP1/DRD2/ENHO/LEP/CHGA/CNR1/MAOB/KCNB1/TRIM9/ADRA2C/SCT	12
GO:0030901	midbrain development	8/650	86/18862	0.00955772	0.113942	0.0991898	SFRP1/PLP1/FGFR2/FGF9/S100A1/MAOB/WNT2/NDRG2	8
GO:0060021	roof of mouth development	8/650	86/18862	0.00955772	0.113942	0.0991898	COL2A1/OSR1/ITGB6/SOX11/TGFBR3/ITGB8/ALX4/DLX6	8
GO:0016079	synaptic vesicle exocytosis	9/650	104/18862	0.00975625	0.115605	0.100638	DRD2/ADCY1/SNAP25/CNR1/SYN1/RIMS1/TRIM9/DOC2A/NLGN1	9
GO:0046942	carboxylic acid transport	18/650	284/18862	0.00987516	0.115605	0.100638	NPY5R/LRP2/ABCC11/NTRK2/SLC6A15/DRD2/KMO/SLC16A11/SLC7A3/LEP/FOLR1/SNAP25/ABCC2/SLCO1A2/SLC25A18/RIMS1/SLC13A5/PLA2G4F	18
GO:0002068	glandular epithelial cell development	4/650	25/18862	0.00993375	0.115605	0.100638	NKX2-2/BMP5/CDH2/RFX3	4
GO:0021846	cell proliferation in forebrain	4/650	25/18862	0.00993375	0.115605	0.100638	ARX/FGFR2/IGF2BP1/DCT	4
GO:0050927	positive regulation of positive chemotaxis	4/650	25/18862	0.00993375	0.115605	0.100638	NTRK3/ARTN/AZU1/NTF3	4
GO:0060219	camera-type eye photoreceptor cell differentiation	4/650	25/18862	0.00993375	0.115605	0.100638	NTRK2/SOX8/SDK2/CRB2	4
GO:0062009	secondary palate development	4/650	25/18862	0.00993375	0.115605	0.100638	ITGB6/SOX11/TGFBR3/ITGB8	4
GO:0072273	metanephric nephron morphogenesis	4/650	25/18862	0.00993375	0.115605	0.100638	LHX1/SOX8/GREM1/CITED1	4
GO:0086013	membrane repolarization during cardiac muscle cell action potential	4/650	25/18862	0.00993375	0.115605	0.100638	KCNH2/KCNIP2/KCND3/KCNE5	4
GO:0055067	monovalent inorganic cation homeostasis	12/650	161/18862	0.00999325	0.11599	0.100973	SLC9A2/DRD2/SCNN1G/TMPRSS3/ATP6V1B1/CCKBR/KCNH2/SLC4A4/PDK4/BCL2/ATP12A/CORIN	12
GO:0060284	regulation of cell development	27/650	485/18862	0.0102085	0.118176	0.102876	LRP2/NKX2-2/PTPRZ1/NTRK2/DRD2/SOX11/FGB/CHODL/BCL11A/BDNF/SOX8/BNC1/LIN28A/DCT/DLL3/RND2/IL34/PAK3/EFNB3/CX3CR1/WNT2/BCL2/NGFR/KIT/SEMA6A/OTP/RFX3	27
GO:0055078	sodium ion homeostasis	6/650	54/18862	0.0103855	0.11991	0.104386	DRD2/SCNN1G/TMPRSS3/ATP6V1B1/ATP12A/CORIN	6
GO:0002066	columnar/cuboidal epithelial cell development	5/650	39/18862	0.0104584	0.120436	0.104843	NKX2-2/BMP5/SPDEF/CDH2/RFX3	5
GO:0042552	myelination	10/650	124/18862	0.0106854	0.122435	0.106584	ERBB2/ORMDL3/PTPRZ1/NTRK2/NCMAP/BCAS1/KLK6/PLP1/UGT8/FA2H	10
GO:0048592	eye morphogenesis	11/650	143/18862	0.0106877	0.122435	0.106584	NTRK2/LHX1/SOX11/SOX8/MFSD2A/CRB1/SDK2/CDON/CRB2/WNT2/BCL2	11
GO:0002791	regulation of peptide secretion	19/650	308/18862	0.0107171	0.122453	0.106599	SFRP1/KCNC2/DRD2/S100A8/ENHO/SAA1/FGB/LEP/FFAR2/CHGA/SNAP25/CNR1/IRS2/KRT20/KCNB1/ADRA2C/NNAT/SCT/RFX3	19
GO:0043627	response to estrogen	7/650	71/18862	0.0110407	0.125823	0.109533	SFRP1/CITED4/ABCC2/AR/EPO/CD24/CITED1	7
GO:0010951	negative regulation of endopeptidase activity	16/650	245/18862	0.0111201	0.125894	0.109595	SPINK8/SERPINA6/CST9/ANXA8L1/SERPINB5/ANXA8/SERPINA10/WFDC2/SERPINA3/SERPINA12/PCSK1N/AMBP/CRYAB/CRB2/NGFR/SERPINF2	16
GO:0002475	antigen processing and presentation via MHC class Ib	3/650	14/18862	0.0111613	0.125894	0.109595	CD1A/CD1C/CD1E	3
GO:0050930	induction of positive chemotaxis	3/650	14/18862	0.0111613	0.125894	0.109595	ARTN/AZU1/NTF3	3
GO:0072498	embryonic skeletal joint development	3/650	14/18862	0.0111613	0.125894	0.109595	COL2A1/OSR1/SLC2A10	3
GO:0071466	cellular response to xenobiotic stimulus	10/650	125/18862	0.0112685	0.125976	0.109666	UGT2B11/UGT2B28/ALDH3A1/ABCC2/GSTM2/NAT2/GLYAT/GGT1/FMO2/NR1I2	10
GO:2000300	regulation of synaptic vesicle exocytosis	6/650	55/18862	0.011327	0.125976	0.109666	DRD2/ADCY1/CNR1/SYN1/RIMS1/NLGN1	6
GO:0003156	regulation of animal organ formation	4/650	26/18862	0.0114263	0.125976	0.109666	AR/MESP1/SIX1/WNT2	4
GO:0010464	regulation of mesenchymal cell proliferation	4/650	26/18862	0.0114263	0.125976	0.109666	FGFR2/IRS2/SIX1/WNT2	4
GO:0042634	regulation of hair cycle	4/650	26/18862	0.0114263	0.125976	0.109666	FERMT1/KRT17/FA2H/NGFR	4
GO:0042745	circadian sleep/wake cycle	4/650	26/18862	0.0114263	0.125976	0.109666	DRD2/CHRNB2/ADRB1/NLGN1	4
GO:0050926	regulation of positive chemotaxis	4/650	26/18862	0.0114263	0.125976	0.109666	NTRK3/ARTN/AZU1/NTF3	4
GO:0071880	adenylate cyclase-activating adrenergic receptor signaling pathway	4/650	26/18862	0.0114263	0.125976	0.109666	DRD2/CHGA/ADRB1/ADRA2C	4
GO:0099625	ventricular cardiac muscle cell membrane repolarization	4/650	26/18862	0.0114263	0.125976	0.109666	KCNH2/KCND3/SCN5A/KCNE5	4
GO:0003341	cilium movement	12/650	164/18862	0.0114651	0.126088	0.109764	ROPN1/ROPN1B/RGN/NEK10/NME5/AQP4/TPPP2/TEKT2/CELSR2/TTLL9/TACR1/RFX3	12
GO:0006730	one-carbon metabolic process	5/650	40/18862	0.011622	0.126726	0.110319	CA3/CA6/ALDH1L1/CA11/MAT1A	5
GO:0014047	glutamate secretion	5/650	40/18862	0.011622	0.126726	0.110319	NPY5R/NTRK2/KMO/SNAP25/RIMS1	5
GO:0090100	positive regulation of transmembrane receptor protein serine/threonine kinase signaling pathway	9/650	107/18862	0.0116365	0.126726	0.110319	BMP5/SOX11/FERMT1/TGFBR3/GDF5/LEFTY2/SLC2A10/CITED1/CRB2	9
GO:0051149	positive regulation of muscle cell differentiation	8/650	89/18862	0.0116384	0.126726	0.110319	RBM24/SMYD1/GREM1/MESP1/CDH2/CDON/BCL2/KIT	8
GO:0051960	regulation of nervous system development	24/650	422/18862	0.0117218	0.127319	0.110835	LRP2/NKX2-2/PTPRZ1/NTRK2/NCMAP/DRD2/SOX11/CHODL/BDNF/SOX8/LIN28A/DCT/DLL3/RND2/IL34/NLGN1/PAK3/EFNB3/CX3CR1/WNT2/NGFR/KIT/SEMA6A/OTP	24
GO:0007272	ensheathment of neurons	10/650	126/18862	0.0118754	0.127746	0.111207	ERBB2/ORMDL3/PTPRZ1/NTRK2/NCMAP/BCAS1/KLK6/PLP1/UGT8/FA2H	10
GO:0008366	axon ensheathment	10/650	126/18862	0.0118754	0.127746	0.111207	ERBB2/ORMDL3/PTPRZ1/NTRK2/NCMAP/BCAS1/KLK6/PLP1/UGT8/FA2H	10
GO:0014855	striated muscle cell proliferation	7/650	72/18862	0.0118772	0.127746	0.111207	TGFBR3/FGFR2/FOXC1/FGF2/FOXC2/SIX1/WNT2	7
GO:0050891	multicellular organismal water homeostasis	7/650	72/18862	0.0118772	0.127746	0.111207	ABCA12/ADCY1/KRT16/SCNN1G/FA2H/ATP6V1B1/AQP4	7
GO:0010959	regulation of metal ion transport	16/650	247/18862	0.011948	0.128194	0.111597	DRD2/PLP1/RGN/CRHR1/GNAO1/RGS9/GSTM2/EPO/WNK3/KCNH2/KCNIP2/STAC/JPH3/KCNE5/BCL2/DMD	16
GO:0050879	multicellular organismal movement	6/650	56/18862	0.0123272	0.131619	0.114579	TCAP/GSTM2/CHRNA1/STAC/MB/DMD	6
GO:0050881	musculoskeletal movement	6/650	56/18862	0.0123272	0.131619	0.114579	TCAP/GSTM2/CHRNA1/STAC/MB/DMD	6
GO:0042472	inner ear morphogenesis	8/650	90/18862	0.0124009	0.132086	0.114985	TCAP/COL2A1/COL11A1/FGFR2/ATP6V1B1/DLX6/SIX1/TMIE	8
GO:0035296	regulation of tube diameter	10/650	127/18862	0.0125066	0.132257	0.115134	EDN3/FGB/CHRM3/LEP/ADRB1/FOXC1/FOXC2/ADRA2C/P2RY2/SERPINF2	10
GO:0097746	blood vessel diameter maintenance	10/650	127/18862	0.0125066	0.132257	0.115134	EDN3/FGB/CHRM3/LEP/ADRB1/FOXC1/FOXC2/ADRA2C/P2RY2/SERPINF2	10
GO:0030900	forebrain development	21/650	357/18862	0.0125071	0.132257	0.115134	LRP2/CNTNAP2/NTRK2/LHX1/KCNC2/DRD2/BCAN/CHRNB2/ARX/FGFR2/GNAO1/MFSD2A/IGF2BP1/DCT/NPY/CDH2/WNT7B/SCN5A/CDON/SCT/OTP	21
GO:0007519	skeletal muscle tissue development	11/650	147/18862	0.0129582	0.136698	0.119	RBM24/SOX11/DNER/SMYD1/SOX8/MYOZ1/CHRNA1/SIX1/CDON/RYR1/BCL2	11
GO:0003401	axis elongation	4/650	27/18862	0.0130557	0.137069	0.119323	SFRP1/MED1/FGFR2/SIX1	4
GO:0035116	embryonic hindlimb morphogenesis	4/650	27/18862	0.0130557	0.137069	0.119323	OSR1/MED1/ALX4/ZBTB16	4
GO:0035150	regulation of tube size	10/650	128/18862	0.0131628	0.137864	0.120015	EDN3/FGB/CHRM3/LEP/ADRB1/FOXC1/FOXC2/ADRA2C/P2RY2/SERPINF2	10
GO:0030510	regulation of BMP signaling pathway	8/650	91/18862	0.0131994	0.13792	0.120064	LRP2/SFRP1/SOSTDC1/SOX11/GDF5/PCSK6/GREM1/CRB2	8
GO:0042481	regulation of odontogenesis	3/650	15/18862	0.0135996	0.140434	0.122252	PAX9/SP6/NGFR	3
GO:0048484	enteric nervous system development	3/650	15/18862	0.0135996	0.140434	0.122252	ARX/SOX8/ISX	3
GO:0072160	nephron tubule epithelial cell differentiation	3/650	15/18862	0.0135996	0.140434	0.122252	OSR1/LHX1/CD24	3
GO:0072283	metanephric renal vesicle morphogenesis	3/650	15/18862	0.0135996	0.140434	0.122252	LHX1/GREM1/CITED1	3
GO:1903818	positive regulation of voltage-gated potassium channel activity	3/650	15/18862	0.0135996	0.140434	0.122252	LRRC26/KCNC2/KCNIP2	3
GO:0010975	regulation of neuron projection development	24/650	428/18862	0.0137239	0.141009	0.122753	SFRP1/NTRK2/BMP5/NTRK3/KLK6/CHODL/CHRNB2/BCL11A/S100A9/BDNF/SNAP25/CNR1/EPO/NEU4/MFSD2A/RGMA/RND2/CDH2/NLGN1/PAK3/EFNB3/SRCIN1/NGFR/SEMA6A	24
GO:0042471	ear morphogenesis	9/650	110/18862	0.0137751	0.141009	0.122753	TCAP/COL2A1/OSR1/COL11A1/FGFR2/ATP6V1B1/DLX6/SIX1/TMIE	9
GO:0090288	negative regulation of cellular response to growth factor stimulus	9/650	110/18862	0.0137751	0.141009	0.122753	LRP2/SFRP1/SOSTDC1/GREM1/CREB3L1/TNMD/FGF2/NGFR/SEMA6A	9
GO:0045216	cell-cell junction organization	14/650	209/18862	0.0137836	0.141009	0.122753	DSG1/CDH19/UGT8/CADM2/POF1B/GJB1/CLDN16/CLDN19/SDK2/CDHR3/FRMPD2/CDH2/CDH12/CDH20	14
GO:0043406	positive regulation of MAP kinase activity	15/650	230/18862	0.0138354	0.141211	0.122929	ERBB2/TF/CXCL17/EDN3/NTRK3/SAA1/NEK10/CD24/FGF2/IL34/PAK3/EPGN/BIRC7/NTF3/KIT	15
GO:0055017	cardiac muscle tissue growth	8/650	92/18862	0.0140349	0.142916	0.124413	TGFBR3/PI16/FGFR2/FOXC1/FGF2/FOXC2/SORBS2/WNT2	8
GO:0031670	cellular response to nutrient	5/650	42/18862	0.0142066	0.14433	0.125644	SFRP1/CYP24A1/MED1/LEP/FOLR1	5
GO:0031638	zymogen activation	6/650	58/18862	0.0145106	0.146488	0.127522	FGB/PRSS12/GGT1/CYFIP2/PRSS3/SERPINF2	6
GO:0060038	cardiac muscle cell proliferation	6/650	58/18862	0.0145106	0.146488	0.127522	TGFBR3/FGFR2/FOXC1/FGF2/FOXC2/WNT2	6
GO:0014902	myotube differentiation	9/650	111/18862	0.0145488	0.146488	0.127522	CEACAM5/RBM24/DNER/SMYD1/BDNF/SIX1/CDON/RYR1/BCL2	9
GO:0006766	vitamin metabolic process	10/650	130/18862	0.0145522	0.146488	0.127522	LRP2/CYP24A1/RGN/FOLR1/ALDH1L1/SLC19A3/SLC52A1/RLBP1/AMN/PRSS3	10
GO:0035883	enteroendocrine cell differentiation	4/650	28/18862	0.0148258	0.147374	0.128294	NKX2-2/BMP5/CDH2/RFX3	4
GO:0044331	cell-cell adhesion mediated by cadherin	4/650	28/18862	0.0148258	0.147374	0.128294	FOXA1/MMP24/CDH2/SERPINF2	4
GO:0060603	mammary gland duct morphogenesis	4/650	28/18862	0.0148258	0.147374	0.128294	SOSTDC1/MED1/FGFR2/AR	4
GO:0086011	membrane repolarization during action potential	4/650	28/18862	0.0148258	0.147374	0.128294	KCNH2/KCNIP2/KCND3/KCNE5	4
GO:0001505	regulation of neurotransmitter levels	14/650	211/18862	0.0148692	0.147374	0.128294	DRD2/KMO/ADCY1/SNAP25/SYN2/CNR1/SYN1/RIMS1/MAOA/MAOB/SLC6A2/TRIM9/DOC2A/NLGN1	14
GO:0015908	fatty acid transport	11/650	150/18862	0.0148881	0.147374	0.128294	NPY5R/NTRK2/DRD2/KMO/SLC27A6/SNAP25/IRS2/SLC25A18/RIMS1/MFSD2A/PLA2G4F	11
GO:0008585	female gonad development	8/650	93/18862	0.0149083	0.147374	0.128294	SFRP1/PTX3/LEP/FOXC1/GAS2/PCYT1B/BCL2/KIT	8
GO:0043473	pigmentation	8/650	93/18862	0.0149083	0.147374	0.128294	EDN3/OCA2/DRD2/EDAR/DCT/CITED1/BCL2/KIT	8
GO:0052547	regulation of peptidase activity	25/650	455/18862	0.0152061	0.149981	0.130564	SPINK8/SERPINA6/CST9/ANXA8L1/SERPINB5/ANXA8/S100A8/SERPINA10/PI15/WFDC2/PCOLCE2/SERPINA3/SERPINA12/PCSK1N/S100A9/AMBP/PI16/PMAIP1/CRYAB/KHDC1/CYFIP2/UMODL1/CRB2/NGFR/SERPINF2	25
GO:0009410	response to xenobiotic stimulus	10/650	131/18862	0.0152866	0.149988	0.13057	UGT2B11/UGT2B28/ALDH3A1/ABCC2/GSTM2/NAT2/GLYAT/GGT1/FMO2/NR1I2	10
GO:0021782	glial cell development	9/650	112/18862	0.015354	0.149988	0.13057	NKX2-2/NTRK2/NCMAP/S100A8/SOX11/PLP1/S100A9/FA2H/ZNF488	9
GO:0030326	embryonic limb morphogenesis	9/650	112/18862	0.015354	0.149988	0.13057	OSR1/FREM2/MED1/GDF5/ALX4/ZBTB16/GREM1/HOXC10/DLX6	9
GO:0035113	embryonic appendage morphogenesis	9/650	112/18862	0.015354	0.149988	0.13057	OSR1/FREM2/MED1/GDF5/ALX4/ZBTB16/GREM1/HOXC10/DLX6	9
GO:0051346	negative regulation of hydrolase activity	25/650	456/18862	0.0155847	0.149988	0.13057	PPP4R4/SPINK8/SERPINA6/CST9/PTX3/ANXA8L1/SERPINB5/ANXA8/SERPINA10/PI15/WFDC2/SERPINA3/SERPINA12/RGN/PCSK1N/AMBP/PI16/MYOZ1/CRYAB/PPP1R14A/UMODL1/PPP1R14D/CRB2/NGFR/SERPINF2	25
GO:0001754	eye photoreceptor cell differentiation	5/650	43/18862	0.0156328	0.149988	0.13057	NTRK2/SOX8/CRB1/SDK2/CRB2	5
GO:0010830	regulation of myotube differentiation	5/650	43/18862	0.0156328	0.149988	0.13057	CEACAM5/RBM24/SMYD1/BDNF/BCL2	5
GO:0014003	oligodendrocyte development	5/650	43/18862	0.0156328	0.149988	0.13057	NKX2-2/SOX11/PLP1/FA2H/ZNF488	5
GO:0021762	substantia nigra development	5/650	43/18862	0.0156328	0.149988	0.13057	PLP1/FGF9/S100A1/MAOB/NDRG2	5
GO:0035094	response to nicotine	5/650	43/18862	0.0156328	0.149988	0.13057	DRD2/CHRNB2/KCNK1/CNR1/BCL2	5
GO:0046189	phenol-containing compound biosynthetic process	5/650	43/18862	0.0156328	0.149988	0.13057	PNMT/OCA2/TPH1/DCT/CITED1	5
GO:0061383	trabecula morphogenesis	5/650	43/18862	0.0156328	0.149988	0.13057	SFRP1/BMP5/MED1/TGFBR3/GREM1	5
GO:0007492	endoderm development	7/650	76/18862	0.0156842	0.149988	0.13057	LHX1/HOXC11/COL11A1/PAX9/LAMA3/MESP1/ITGA7	7
GO:0060395	SMAD protein signal transduction	7/650	76/18862	0.0156842	0.149988	0.13057	TF/BMP5/ITGB6/GDF5/LEFTY2/SLC2A10/CITED1	7
GO:0017014	protein nitrosylation	3/650	16/18862	0.0163165	0.154114	0.134162	S100A8/S100A9/DMD	3
GO:0018119	peptidyl-cysteine S-nitrosylation	3/650	16/18862	0.0163165	0.154114	0.134162	S100A8/S100A9/DMD	3
GO:0031649	heat generation	3/650	16/18862	0.0163165	0.154114	0.134162	ADRB1/CNR1/PTGS2	3
GO:0051238	sequestering of metal ion	3/650	16/18862	0.0163165	0.154114	0.134162	S100A7/S100A8/S100A9	3
GO:0098915	membrane repolarization during ventricular cardiac muscle cell action potential	3/650	16/18862	0.0163165	0.154114	0.134162	KCNH2/KCND3/KCNE5	3
GO:0051480	regulation of cytosolic calcium ion concentration	20/650	344/18862	0.0163258	0.154114	0.134162	RIC3/GRIA1/DRD2/SAA1/KCNK3/CCKBR/CNR1/GSTM2/EPO/CD24/FGF2/PTGFR/FZD9/JPH3/CX3CR1/RYR1/TACR1/BCL2/DMD/OPRL1	20
GO:1901654	response to ketone	13/650	193/18862	0.016533	0.155736	0.135573	HOXB13/NKX2-2/SFRP1/DSG1/ADCY1/SCNN1G/TGFBR3/ABCC2/AR/EPO/MAOB/CATSPERB/PTGFR	13
GO:0030511	positive regulation of transforming growth factor beta receptor signaling pathway	4/650	29/18862	0.0167404	0.156648	0.136367	FERMT1/TGFBR3/SLC2A10/CITED1	4
GO:0060914	heart formation	4/650	29/18862	0.0167404	0.156648	0.136367	LRP2/FOLR1/MESP1/SIX1	4
GO:1903846	positive regulation of cellular response to transforming growth factor beta stimulus	4/650	29/18862	0.0167404	0.156648	0.136367	FERMT1/TGFBR3/SLC2A10/CITED1	4
GO:0060840	artery development	8/650	95/18862	0.0167723	0.156648	0.136367	LRP2/LEP/FOLR1/FOXC1/SLC2A10/FOXC2/SIX1/NGFR	8
GO:0007416	synapse assembly	12/650	173/18862	0.0168926	0.156969	0.136646	NTRK2/DRD2/CHRNB2/DNER/BDNF/BSN/IL1RAPL2/SDK2/ADD2/CDH2/NLGN1/SIX1	12
GO:0040014	regulation of multicellular organism growth	6/650	60/18862	0.0169493	0.156969	0.136646	NPY1R/DRD2/GDF5/ADRB1/MFSD2A/BCL2	6
GO:0046888	negative regulation of hormone secretion	6/650	60/18862	0.0169493	0.156969	0.136646	SFRP1/DRD2/ENHO/LEP/CHGA/KCNB1	6
GO:0051926	negative regulation of calcium ion transport	6/650	60/18862	0.0169493	0.156969	0.136646	DRD2/CRHR1/GNAO1/GSTM2/EPO/BCL2	6
GO:0060711	labyrinthine layer development	5/650	44/18862	0.0171513	0.158476	0.137959	BMP5/FGFR2/CITED1/WNT7B/WNT2	5
GO:1905475	regulation of protein localization to membrane	13/650	194/18862	0.0171842	0.158476	0.137959	ERBB2/PDZK1/AR/PMAIP1/WNK3/KCNB1/FZD9/STAC/MRAP/CDH2/LRRC15/MRAP2/BCL2	13
GO:0090101	negative regulation of transmembrane receptor protein serine/threonine kinase signaling pathway	10/650	134/18862	0.0176556	0.162181	0.141184	LRP2/SFRP1/SOSTDC1/IGSF1/ONECUT2/CIDEA/TGFBR3/GREM1/DACT2/SLC2A10	10
GO:0051051	negative regulation of transport	24/650	438/18862	0.0176596	0.162181	0.141184	NPY5R/SFRP1/OSR1/DRD2/ENHO/FERMT1/LEP/CRHR1/CHGA/GNAO1/CNR1/IRS2/GSTM2/EPO/MAOB/CRYAB/WNK3/KCNH2/KCNB1/TRIM9/ADRA2C/KCNE5/BCL2/SCT	24
GO:0043648	dicarboxylic acid metabolic process	8/650	96/18862	0.0177647	0.162684	0.141622	PRODH/KMO/FOLR1/ALDH1L1/NAGS/GGT1/QPRT/ADHFE1	8
GO:0014065	phosphatidylinositol 3-kinase signaling	11/650	154/18862	0.0177884	0.162684	0.141622	ERBB2/NTRK2/NTRK3/SERPINA12/LEP/NYAP1/IRS2/EPO/FGF2/NTF3/KIT	11
GO:1901215	negative regulation of neuron death	13/650	195/18862	0.0178546	0.162951	0.141854	PTPRZ1/NTRK2/FAIM2/CHGA/GDF5/BDNF/EPO/CITED1/FZD9/SIX1/CX3CR1/BCL2/NTF3	13
GO:0001704	formation of primary germ layer	9/650	115/18862	0.0179663	0.163631	0.142446	LHX1/COL11A1/FGFR2/FOXC1/LAMA3/FOXC2/MESP1/CRB2/ITGA7	9
GO:0016266	O-glycan processing	6/650	61/18862	0.0182685	0.166032	0.144536	MUCL1/CHST4/MUC19/MUC21/GALNT6/GALNT3	6
GO:0030001	metal ion transport	26/650	486/18862	0.0183054	0.166032	0.144536	LRP2/DRD2/PLP1/CHRNB2/RGN/TRPM6/CRHR1/GNAO1/RGS9/GSTM2/EPO/CLDN16/WNK3/KCNH2/KCNIP2/FGF2/SLC4A4/NMUR1/STAC/KCND3/JPH3/KCNE5/RYR1/BCL2/DMD/ATP12A	26
GO:0001894	tissue homeostasis	16/650	260/18862	0.0185716	0.167441	0.145763	ABCA12/TF/COL2A1/ITGB6/SERPINA3/NXNL2/FOXC1/MFSD2A/WNK3/CRB1/NANOS1/PDK4/TP53INP2/CRB2/BCL2/DMD	16
GO:0007269	neurotransmitter secretion	11/650	155/18862	0.0185749	0.167441	0.145763	DRD2/KMO/ADCY1/SNAP25/SYN2/CNR1/SYN1/RIMS1/TRIM9/DOC2A/NLGN1	11
GO:0099643	signal release from synapse	11/650	155/18862	0.0185749	0.167441	0.145763	DRD2/KMO/ADCY1/SNAP25/SYN2/CNR1/SYN1/RIMS1/TRIM9/DOC2A/NLGN1	11
GO:0042551	neuron maturation	5/650	45/18862	0.0187644	0.167775	0.146053	CNTNAP2/BCL11A/KCNIP2/RND1/BCL2	5
GO:0086009	membrane repolarization	5/650	45/18862	0.0187644	0.167775	0.146053	KCNH2/KCNIP2/KCND3/SCN5A/KCNE5	5
GO:0002027	regulation of heart rate	8/650	97/18862	0.0187985	0.167775	0.146053	EDN3/DRD2/ADRB1/KCNH2/KCND3/SCN5A/KCNE5/DMD	8
GO:0060045	positive regulation of cardiac muscle cell proliferation	4/650	30/18862	0.0188026	0.167775	0.146053	TGFBR3/FGFR2/FGF2/WNT2	4
GO:1905476	negative regulation of protein localization to membrane	4/650	30/18862	0.0188026	0.167775	0.146053	FZD9/MRAP/LRRC15/MRAP2	4
GO:0009636	response to toxic substance	15/650	239/18862	0.0189495	0.16825	0.146467	IYD/KCNC2/PDZK1/DRD2/AKR1B10/S100A9/TRPM6/ABCC2/GSTM2/MAOB/PTGS2/GLYAT/MT1M/CERS1/BCL2	15
GO:0043523	regulation of neuron apoptotic process	13/650	197/18862	0.0192546	0.16825	0.146467	PTPRZ1/NTRK2/FAIM2/GDF5/BDNF/KCNB1/CITED1/FZD9/PAK3/SIX1/CX3CR1/BCL2/NTF3	13
GO:0001956	positive regulation of neurotransmitter secretion	3/650	17/18862	0.0193149	0.16825	0.146467	KMO/CNR1/NLGN1	3
GO:0010470	regulation of gastrulation	3/650	17/18862	0.0193149	0.16825	0.146467	OSR1/LHX1/CRB2	3
GO:0010523	negative regulation of calcium ion transport into cytosol	3/650	17/18862	0.0193149	0.16825	0.146467	GSTM2/EPO/BCL2	3
GO:0032332	positive regulation of chondrocyte differentiation	3/650	17/18862	0.0193149	0.16825	0.146467	GDF5/ZBTB16/SOX6	3
GO:0035461	vitamin transmembrane transport	3/650	17/18862	0.0193149	0.16825	0.146467	LRP2/FOLR1/SLC19A3	3
GO:0043649	dicarboxylic acid catabolic process	3/650	17/18862	0.0193149	0.16825	0.146467	ALDH1L1/QPRT/ADHFE1	3
GO:0045187	regulation of circadian sleep/wake cycle, sleep	3/650	17/18862	0.0193149	0.16825	0.146467	DRD2/CHRNB2/ADRB1	3
GO:0048339	paraxial mesoderm development	3/650	17/18862	0.0193149	0.16825	0.146467	FOXC1/FOXC2/DLL3	3
GO:0051797	regulation of hair follicle development	3/650	17/18862	0.0193149	0.16825	0.146467	FERMT1/KRT17/NGFR	3
GO:0060602	branch elongation of an epithelium	3/650	17/18862	0.0193149	0.16825	0.146467	MED1/FGFR2/SIX1	3
GO:0032147	activation of protein kinase activity	19/650	328/18862	0.0195652	0.170094	0.148072	TF/CXCL17/NTRK3/DRD2/SAA1/ADCY1/LEP/CHI3L1/EPO/GREM1/NRK/FGF2/GPRC5C/PAK3/EPGN/ADRA2C/BIRC7/NTF3/KIT	19
GO:1901016	regulation of potassium ion transmembrane transporter activity	6/650	62/18862	0.0196562	0.170548	0.148467	LRRC26/KCNC2/NETO1/KCNIP2/KCNS1/KCNE5	6
GO:0050730	regulation of peptidyl-tyrosine phosphorylation	16/650	262/18862	0.0198008	0.171464	0.149265	SFRP1/NTRK2/CBLC/LEP/HPX/BDNF/TSLP/EPO/CD24/GREM1/DOK7/IL34/EPGN/SRCIN1/NTF3/KIT	16
GO:0008217	regulation of blood pressure	12/650	177/18862	0.0198468	0.171524	0.149318	NPY1R/EDN3/DRD2/LEP/CHGA/ADRB1/CNR1/AR/PTGS2/NPY/CORIN/SERPINF2	12
GO:0006575	cellular modified amino acid metabolic process	13/650	198/18862	0.0199847	0.172378	0.150061	IYD/PRODH/MED1/CRYM/FOLR1/ALDH1L1/GSTM2/CRAT/MFSD2A/PLA2G4D/GGT1/PLA2G4F/GDAP1L1	13
GO:0060538	skeletal muscle organ development	11/650	157/18862	0.0202251	0.17411	0.151568	RBM24/SOX11/DNER/SMYD1/SOX8/MYOZ1/CHRNA1/SIX1/CDON/RYR1/BCL2	11
GO:0045445	myoblast differentiation	7/650	80/18862	0.0202855	0.174289	0.151725	SOSTDC1/RBM24/SMYD1/SOX8/CMTM5/GREM1/CDON	7
GO:0043405	regulation of MAP kinase activity	18/650	307/18862	0.0203411	0.174426	0.151843	ERBB2/SFRP1/TF/CXCL17/EDN3/NTRK3/SAA1/CDK12/CBLC/NEK10/CD24/FGF2/IL34/PAK3/EPGN/BIRC7/NTF3/KIT	18
GO:0042461	photoreceptor cell development	5/650	46/18862	0.0204743	0.174547	0.151949	DCX/NTRK2/MFSD2A/CRB1/CRB2	5
GO:0048483	autonomic nervous system development	5/650	46/18862	0.0204743	0.174547	0.151949	SOX11/ARX/SOX8/ISX/SIX1	5
GO:2001258	negative regulation of cation channel activity	5/650	46/18862	0.0204743	0.174547	0.151949	DRD2/CRHR1/GSTM2/EPO/KCNE5	5
GO:0003382	epithelial cell morphogenesis	4/650	31/18862	0.0210154	0.177441	0.154468	POF1B/AR/DACT2/TNMD	4
GO:0032228	regulation of synaptic transmission, GABAergic	4/650	31/18862	0.0210154	0.177441	0.154468	NPY5R/DRD2/CNR1/NLGN1	4
GO:0048741	skeletal muscle fiber development	4/650	31/18862	0.0210154	0.177441	0.154468	DNER/SIX1/RYR1/BCL2	4
GO:0071875	adrenergic receptor signaling pathway	4/650	31/18862	0.0210154	0.177441	0.154468	DRD2/CHGA/ADRB1/ADRA2C	4
GO:1902692	regulation of neuroblast proliferation	4/650	31/18862	0.0210154	0.177441	0.154468	DRD2/DCT/CX3CR1/OTP	4
GO:0061180	mammary gland epithelium development	6/650	63/18862	0.0211139	0.177931	0.154895	SOSTDC1/MED1/FGFR2/AR/WNT7B/WNT2	6
GO:0022617	extracellular matrix disassembly	7/650	81/18862	0.0215685	0.181069	0.157626	FGFR4/MMP1/KLK7/MMP13/MMP20/KLK4/MMP11	7
GO:0140353	lipid export from cell	7/650	81/18862	0.0215685	0.181069	0.157626	NPY5R/NTRK2/KMO/LEP/CRHR1/SNAP25/RIMS1	7
GO:0046395	carboxylic acid catabolic process	15/650	243/18862	0.0216376	0.181303	0.15783	PRODH/HMGCLL1/KMO/CRYM/HGD/LEP/ALDH1L1/CNR1/IRS2/CRAT/GPT/MFSD2A/MAT1A/QPRT/ADHFE1	15
GO:0034766	negative regulation of ion transmembrane transport	9/650	119/18862	0.0219338	0.183435	0.159686	OSR1/DRD2/LEP/CRHR1/IRS2/GSTM2/EPO/KCNH2/KCNE5	9
GO:0050921	positive regulation of chemotaxis	10/650	139/18862	0.0221896	0.185222	0.161242	S100A7/CXCL17/EDN3/NTRK3/ARTN/LBP/AZU1/FGF2/IL34/NTF3	10
GO:0007528	neuromuscular junction development	5/650	47/18862	0.0222827	0.185647	0.161612	ERBB2/DOK7/CHRNA1/FZD9/SIX1	5
GO:1901317	regulation of flagellated sperm motility	3/650	18/18862	0.0225965	0.187551	0.163269	RGN/TPPP2/TACR1	3
GO:2000738	positive regulation of stem cell differentiation	3/650	18/18862	0.0225965	0.187551	0.163269	RBM24/FOXC1/SOX6	3
GO:0035914	skeletal muscle cell differentiation	6/650	64/18862	0.0226431	0.187584	0.163298	RBM24/SOX11/SMYD1/SOX8/SIX1/CDON	6
GO:0034763	negative regulation of transmembrane transport	9/650	120/18862	0.0230166	0.19032	0.165679	OSR1/DRD2/LEP/CRHR1/IRS2/GSTM2/EPO/KCNH2/KCNE5	9
GO:0007179	transforming growth factor beta receptor signaling pathway	13/650	202/18862	0.0231146	0.190414	0.165761	ITGB6/SOX11/ONECUT2/FERMT1/CIDEA/TGFBR3/FOLR1/GDF5/ITGB8/LEFTY2/DUSP15/SLC2A10/CITED1	13
GO:0043583	ear development	13/650	202/18862	0.0231146	0.190414	0.165761	TCAP/COL2A1/OSR1/FREM2/COL11A1/FGFR2/KCNK3/ATP6V1B1/SLC25A27/DLX6/SIX1/BCL2/TMIE	13
GO:0022037	metencephalon development	8/650	101/18862	0.0233649	0.191179	0.166427	NEUROD2/LHX1/FAIM2/FOXC1/NANOS1/SCN5A/TRNP1/BCL2	8
GO:0003351	epithelial cilium movement involved in extracellular fluid movement	4/650	32/18862	0.0233812	0.191179	0.166427	NEK10/NME5/AQP4/RFX3	4
GO:0009954	proximal/distal pattern formation	4/650	32/18862	0.0233812	0.191179	0.166427	OSR1/IRX1/GREM1/HOXC10	4
GO:0016486	peptide hormone processing	4/650	32/18862	0.0233812	0.191179	0.166427	PCSK1/PCSK1N/PCSK6/CORIN	4
GO:0016485	protein processing	14/650	224/18862	0.0236037	0.192283	0.167389	PCSK1/FGB/KLK6/PRSS12/PCSK1N/MYRFL/TMPRSS4/KLK13/PCSK6/GGT1/CYFIP2/CORIN/PRSS3/SERPINF2	14
GO:0072330	monocarboxylic acid biosynthetic process	14/650	224/18862	0.0236037	0.192283	0.167389	FGFR4/KMO/PLP1/RGN/FA2H/ELOVL2/GSTM2/FADS2/CYP39A1/OLAH/PTGS2/SCD/PLA2G4F/PDK4	14
GO:0030307	positive regulation of cell growth	11/650	161/18862	0.0238461	0.193898	0.168795	ERBB2/SFRP1/S100A8/KRT17/S100A9/BDNF/RIMS1/MFSD2A/RND2/BCL2/IGFBP1	11
GO:0060425	lung morphogenesis	5/650	48/18862	0.0241917	0.196148	0.170754	SOX11/FOXA1/FGFR2/WNT7B/WNT2	5
GO:0009880	embryonic pattern specification	6/650	65/18862	0.024245	0.196148	0.170754	LHX1/FGFR2/ZBTB16/CITED1/MESP1/RIPPLY2	6
GO:0060291	long-term synaptic potentiation	7/650	83/18862	0.0243012	0.196148	0.170754	NTRK2/DRD2/ADCY1/SNAP25/FAM107A/NLGN1/CX3CR1	7
GO:1901019	regulation of calcium ion transmembrane transporter activity	7/650	83/18862	0.0243012	0.196148	0.170754	DRD2/RGN/CRHR1/GSTM2/STAC/JPH3/DMD	7
GO:0046620	regulation of organ growth	8/650	102/18862	0.0246184	0.198345	0.172666	TGFBR3/ARX/PI16/FGFR2/FOXC1/FGF2/FOXC2/WNT2	8
GO:0050807	regulation of synapse organization	13/650	204/18862	0.0248095	0.199519	0.173688	NEUROD2/NTRK2/LRFN2/DRD2/CHRNB2/PCDH8/BDNF/IL1RAPL2/CDH2/NLGN1/PAK3/SRCIN1/SIX1	13
GO:0030595	leukocyte chemotaxis	14/650	226/18862	0.0252301	0.202531	0.17631	S100A7/CXCL17/EDN3/S100A8/SAA1/LBP/S100A9/FFAR2/CHGA/GREM1/AZU1/IL34/CXCL2/KIT	14
GO:0035270	endocrine system development	9/650	122/18862	0.0252958	0.202689	0.176447	NKX2-2/MNX1/BMP5/DRD2/ONECUT2/CDH2/SIX1/OTP/RFX3	9
GO:0006767	water-soluble vitamin metabolic process	7/650	84/18862	0.0257528	0.203983	0.177574	RGN/FOLR1/ALDH1L1/SLC19A3/SLC52A1/AMN/PRSS3	7
GO:0030324	lung development	11/650	163/18862	0.0258241	0.203983	0.177574	ABCA12/SPDEF/ITGB6/SOX11/FOXA1/FGFR2/CHI3L1/FGF9/FGF2/WNT7B/WNT2	11
GO:0006536	glutamate metabolic process	4/650	33/18862	0.0259022	0.203983	0.177574	PRODH/NAGS/GGT1/ADHFE1	4
GO:0046320	regulation of fatty acid oxidation	4/650	33/18862	0.0259022	0.203983	0.177574	CNR1/IRS2/MFSD2A/PDK4	4
GO:0051954	positive regulation of amine transport	4/650	33/18862	0.0259022	0.203983	0.177574	DRD2/KMO/CHRNB2/KCNB1	4
GO:0140448	signaling receptor ligand precursor processing	4/650	33/18862	0.0259022	0.203983	0.177574	PCSK1/PCSK1N/PCSK6/CORIN	4
GO:0002062	chondrocyte differentiation	8/650	103/18862	0.0259182	0.203983	0.177574	COL2A1/OSR1/COL11A1/GDF5/ZBTB16/GREM1/SOX6/COL27A1	8
GO:0007200	phospholipase C-activating G protein-coupled receptor signaling pathway	8/650	103/18862	0.0259182	0.203983	0.177574	DRD2/CHGA/CCKBR/NMUR1/CX3CR1/TACR1/OPRL1/P2RY2	8
GO:0055002	striated muscle cell development	8/650	103/18862	0.0259182	0.203983	0.177574	TCAP/DNER/MYOZ1/SIX1/RYR1/OBSCN/BCL2/DMD	8
GO:0034332	adherens junction organization	6/650	66/18862	0.025921	0.203983	0.177574	CDH19/CADM2/CDHR3/CDH2/CDH12/CDH20	6
GO:0045663	positive regulation of myoblast differentiation	3/650	19/18862	0.0261614	0.204735	0.178229	RBM24/SMYD1/CDON	3
GO:0072234	metanephric nephron tubule development	3/650	19/18862	0.0261614	0.204735	0.178229	OSR1/SOX8/WNT7B	3
GO:0097150	neuronal stem cell population maintenance	3/650	19/18862	0.0261614	0.204735	0.178229	IGF2BP1/MMP24/CDH2	3
GO:0021515	cell differentiation in spinal cord	5/650	49/18862	0.0262027	0.204735	0.178229	NKX2-2/MNX1/LHX1/HOXC10/SOX6	5
GO:0046928	regulation of neurotransmitter secretion	7/650	85/18862	0.0272625	0.212262	0.184781	DRD2/KMO/ADCY1/CNR1/SYN1/RIMS1/NLGN1	7
GO:0050829	defense response to Gram-negative bacterium	7/650	85/18862	0.0272625	0.212262	0.184781	S100A7/LBP/CHGA/BPI/AZU1/CAMP/IL22RA1	7
GO:0050806	positive regulation of synaptic transmission	10/650	144/18862	0.0275141	0.213522	0.185878	NTRK2/DRD2/KMO/ADCY1/SNAP25/FAM107A/CNR1/RIMS1/NLGN1/CX3CR1	10
GO:0030073	insulin secretion	13/650	207/18862	0.0275215	0.213522	0.185878	SFRP1/KCNC2/DRD2/ENHO/LEP/CHGA/SNAP25/CNR1/IRS2/KCNB1/ADRA2C/NNAT/RFX3	13
GO:0015800	acidic amino acid transport	6/650	67/18862	0.0276722	0.213936	0.186239	NPY5R/NTRK2/KMO/SNAP25/SLC25A18/RIMS1	6
GO:0019226	transmission of nerve impulse	6/650	67/18862	0.0276722	0.213936	0.186239	CNTNAP2/NTRK2/CLDN19/CHRNA1/SCN5A/SCN3A	6
GO:0071621	granulocyte chemotaxis	9/650	124/18862	0.0277306	0.214012	0.186305	S100A7/CXCL17/EDN3/S100A8/SAA1/LBP/S100A9/IL34/CXCL2	9
GO:0045104	intermediate filament cytoskeleton organization	5/650	50/18862	0.0283175	0.217777	0.189582	KRT14/KRT17/KRT16/GFAP/KRT20	5
GO:1990089	response to nerve growth factor	5/650	50/18862	0.0283175	0.217777	0.189582	NTRK2/KCNC2/NTRK3/BDNF/NTF3	5
GO:0014904	myotube cell development	4/650	34/18862	0.0285802	0.218271	0.190012	DNER/SIX1/RYR1/BCL2	4
GO:0033280	response to vitamin D	4/650	34/18862	0.0285802	0.218271	0.190012	SFRP1/CYP24A1/MED1/STC2	4
GO:0090050	positive regulation of cell migration involved in sprouting angiogenesis	4/650	34/18862	0.0285802	0.218271	0.190012	FGFBP1/PTGS2/FGF2/FOXC2	4
GO:1901385	regulation of voltage-gated calcium channel activity	4/650	34/18862	0.0285802	0.218271	0.190012	DRD2/CRHR1/STAC/DMD	4
GO:0001764	neuron migration	10/650	145/18862	0.0286795	0.218272	0.190013	DCX/NTRK2/LHX1/DRD2/ARX/DNER/DCDC2/CELSR2/ASTN1/SEMA6A	10
GO:0009582	detection of abiotic stimulus	10/650	145/18862	0.0286795	0.218272	0.190013	TCAP/COL11A1/CRB1/RGR/PDE6B/MMP24/CDH2/TACR1/NGFR/KIT	10
GO:0051402	neuron apoptotic process	14/650	230/18862	0.0287303	0.218281	0.19002	PTPRZ1/NTRK2/FAIM2/GDF5/BDNF/KCNB1/CITED1/FZD9/PAK3/SIX1/CX3CR1/BCL2/NTF3/NGFR	14
GO:0007589	body fluid secretion	7/650	86/18862	0.0288313	0.218671	0.19036	MED1/CHRM3/CSN3/CELSR2/NLRP6/SCT/P2RY2	7
GO:0006836	neurotransmitter transport	13/650	209/18862	0.0294462	0.22295	0.194085	SLC6A15/DRD2/KMO/ADCY1/SNAP25/SYN2/CNR1/SYN1/RIMS1/SLC6A2/TRIM9/DOC2A/NLGN1	13
GO:0008306	associative learning	6/650	68/18862	0.0294997	0.222971	0.194104	NEUROD2/DRD2/CHRNB2/SNAP25/NETO1/KIT	6
GO:0060541	respiratory system development	12/650	188/18862	0.0299444	0.223517	0.194579	ABCA12/SPDEF/ITGB6/SOX11/FOXA1/FGFR2/CHI3L1/FGF9/FGF2/WNT7B/SIX1/WNT2	12
GO:0031998	regulation of fatty acid beta-oxidation	3/650	20/18862	0.030009	0.223517	0.194579	CNR1/IRS2/MFSD2A	3
GO:0032891	negative regulation of organic acid transport	3/650	20/18862	0.030009	0.223517	0.194579	NPY5R/LEP/IRS2	3
GO:0043931	ossification involved in bone maturation	3/650	20/18862	0.030009	0.223517	0.194579	LEP/GREM1/RYR1	3
GO:0050802	circadian sleep/wake cycle, sleep	3/650	20/18862	0.030009	0.223517	0.194579	DRD2/CHRNB2/ADRB1	3
GO:0060713	labyrinthine layer morphogenesis	3/650	20/18862	0.030009	0.223517	0.194579	BMP5/FGFR2/WNT7B	3
GO:0061318	renal filtration cell differentiation	3/650	20/18862	0.030009	0.223517	0.194579	KLF15/CD24/FOXC2	3
GO:0072112	glomerular visceral epithelial cell differentiation	3/650	20/18862	0.030009	0.223517	0.194579	KLF15/CD24/FOXC2	3
GO:0007218	neuropeptide signaling pathway	8/650	106/18862	0.0301027	0.223517	0.194579	NPY5R/NPY1R/SORCS1/PCSK1N/QRFPR/NMUR1/NPY/OPRL1	8
GO:0009063	cellular amino acid catabolic process	8/650	106/18862	0.0301027	0.223517	0.194579	PRODH/HMGCLL1/KMO/CRYM/HGD/GPT/MAT1A/ADHFE1	8
GO:0030323	respiratory tube development	11/650	167/18862	0.0301318	0.223517	0.194579	ABCA12/SPDEF/ITGB6/SOX11/FOXA1/FGFR2/CHI3L1/FGF9/FGF2/WNT7B/WNT2	11
GO:0045471	response to ethanol	9/650	126/18862	0.0303257	0.223517	0.194579	KCNC2/CA3/DRD2/S100A8/CHRNB2/LEP/FGFR2/CNR1/MAOB	9
GO:0031669	cellular response to nutrient levels	13/650	210/18862	0.0304445	0.223517	0.194579	SFRP1/CYP24A1/MED1/DAPL1/LEP/FOLR1/FAM107A/PMAIP1/MFSD2A/KRT20/KCNB1/PDK4/BCL2	13
GO:0006029	proteoglycan metabolic process	7/650	87/18862	0.03046	0.223517	0.194579	COL2A1/HS6ST3/CHST9/COL11A1/BCAN/HS3ST4/SLC2A10	7
GO:1904063	negative regulation of cation transmembrane transport	7/650	87/18862	0.03046	0.223517	0.194579	OSR1/DRD2/CRHR1/GSTM2/EPO/KCNH2/KCNE5	7
GO:0006636	unsaturated fatty acid biosynthetic process	5/650	51/18862	0.0305373	0.223517	0.194579	ELOVL2/FADS2/PTGS2/SCD/PLA2G4F	5
GO:0045103	intermediate filament-based process	5/650	51/18862	0.0305373	0.223517	0.194579	KRT14/KRT17/KRT16/GFAP/KRT20	5
GO:0046850	regulation of bone remodeling	5/650	51/18862	0.0305373	0.223517	0.194579	SFRP1/TF/LEP/GREM1/PDK4	5
GO:0071715	icosanoid transport	5/650	51/18862	0.0305373	0.223517	0.194579	ABCC11/DRD2/LEP/ABCC2/PLA2G4F	5
GO:0007411	axon guidance	16/650	277/18862	0.0310909	0.226814	0.197449	ERBB2/GRB7/LGR6/LHX1/ARTN/UNC5A/ARX/BDNF/IRS2/LAMA3/NRTN/KIF5A/EFNB3/MYOT/NGFR/SEMA6A	16
GO:0048562	embryonic organ morphogenesis	16/650	277/18862	0.0310909	0.226814	0.197449	TCAP/COL2A1/OSR1/LHX1/SOX11/COL11A1/FOLR1/FGFR2/ATP6V1B1/ALX4/DLX6/FOXC2/MESP1/SIX1/CRB2/TMIE	16
GO:0006631	fatty acid metabolic process	21/650	392/18862	0.0312464	0.227305	0.197876	CYP24A1/PLP1/SLC27A6/RGN/LEP/FA2H/ATP6V1B1/ELOVL2/CNR1/IRS2/GSTM2/CRAT/FADS2/OLAH/MFSD2A/PTGS2/SCD/PLA2G4D/GGT1/PLA2G4F/PDK4	21
GO:0006633	fatty acid biosynthetic process	11/650	168/18862	0.0312845	0.227305	0.197876	PLP1/RGN/FA2H/ELOVL2/GSTM2/FADS2/OLAH/PTGS2/SCD/PLA2G4F/PDK4	11
GO:0006858	extracellular transport	4/650	35/18862	0.0314165	0.227305	0.197876	NEK10/NME5/AQP4/RFX3	4
GO:0040036	regulation of fibroblast growth factor receptor signaling pathway	4/650	35/18862	0.0314165	0.227305	0.197876	FGFBP1/CREB3L1/FGF2/NGFR	4
GO:0086005	ventricular cardiac muscle cell action potential	4/650	35/18862	0.0314165	0.227305	0.197876	KCNH2/KCND3/SCN5A/KCNE5	4
GO:0018108	peptidyl-tyrosine phosphorylation	20/650	369/18862	0.0314794	0.227386	0.197947	ERBB2/SFRP1/FGFR4/NTRK2/NTRK3/CBLC/LEP/HPX/BDNF/FGFR2/TSLP/EPO/CD24/GREM1/DOK7/IL34/EPGN/SRCIN1/NTF3/KIT	20
GO:0097305	response to alcohol	14/650	233/18862	0.0315803	0.227548	0.198088	SFRP1/KCNC2/CA3/DRD2/S100A8/ADCY1/SCNN1G/CHRNB2/TGFBR3/LEP/FGFR2/CNR1/MAOB/PTGFR	14
GO:0045861	negative regulation of proteolysis	19/650	346/18862	0.0316053	0.227548	0.198088	SPINK8/SERPINA6/CST9/ANXA8L1/SERPINB5/ANXA8/SERPINA10/PI15/WFDC2/SERPINA3/SERPINA12/PCSK1N/AMBP/PI16/CRYAB/UMODL1/CRB2/NGFR/SERPINF2	19
GO:0014066	regulation of phosphatidylinositol 3-kinase signaling	9/650	127/18862	0.0316848	0.227748	0.198262	NTRK2/NTRK3/SERPINA12/LEP/IRS2/EPO/FGF2/NTF3/KIT	9
GO:0097485	neuron projection guidance	16/650	278/18862	0.0319839	0.229523	0.199807	ERBB2/GRB7/LGR6/LHX1/ARTN/UNC5A/ARX/BDNF/IRS2/LAMA3/NRTN/KIF5A/EFNB3/MYOT/NGFR/SEMA6A	16
GO:1901606	alpha-amino acid catabolic process	7/650	88/18862	0.0321494	0.230334	0.200514	PRODH/KMO/CRYM/HGD/GPT/MAT1A/ADHFE1	7
GO:0097530	granulocyte migration	10/650	148/18862	0.0323854	0.231647	0.201657	S100A7/CXCL17/EDN3/S100A8/SAA1/LBP/S100A9/IL34/CXCL2/UMODL1	10
GO:0006584	catecholamine metabolic process	5/650	52/18862	0.0328635	0.233777	0.203511	PNMT/DRD2/CHRNB2/MAOA/MAOB	5
GO:0009712	catechol-containing compound metabolic process	5/650	52/18862	0.0328635	0.233777	0.203511	PNMT/DRD2/CHRNB2/MAOA/MAOB	5
GO:0051155	positive regulation of striated muscle cell differentiation	5/650	52/18862	0.0328635	0.233777	0.203511	RBM24/SMYD1/GREM1/MESP1/BCL2	5
GO:0050708	regulation of protein secretion	16/650	279/18862	0.0328957	0.233777	0.203511	SFRP1/KCNC2/DRD2/ENHO/SAA1/FGB/LEP/CHGA/SNAP25/CNR1/IRS2/KRT20/KCNB1/ADRA2C/NNAT/RFX3	16
GO:1901605	alpha-amino acid metabolic process	12/650	191/18862	0.0332467	0.235891	0.20535	IYD/PRODH/KMO/CRYM/HGD/GPT/NAGS/MAT1A/DCT/GLYAT/GGT1/ADHFE1	12
GO:0003407	neural retina development	6/650	70/18862	0.0333882	0.236514	0.205893	NTRK2/LHX1/SOX8/CRB1/SDK2/CRB2	6
GO:0048639	positive regulation of developmental growth	11/650	170/18862	0.0336833	0.236861	0.206195	DRD2/TGFBR3/LEP/ARX/BDNF/FGFR2/RIMS1/FGF2/RND2/WNT2/BCL2	11
GO:0061337	cardiac conduction	10/650	149/18862	0.0336921	0.236861	0.206195	KCNK3/KCNK1/KCNIP1/KCNH2/KCNIP2/KCND3/SCN5A/KCNE5/RYR1/CORIN	10
GO:0018212	peptidyl-tyrosine modification	20/650	372/18862	0.0338385	0.236861	0.206195	ERBB2/SFRP1/FGFR4/NTRK2/NTRK3/CBLC/LEP/HPX/BDNF/FGFR2/TSLP/EPO/CD24/GREM1/DOK7/IL34/EPGN/SRCIN1/NTF3/KIT	20
GO:0033273	response to vitamin	7/650	89/18862	0.0339004	0.236861	0.206195	SFRP1/CYP24A1/MED1/LEP/STC2/FOLR1/EPO	7
GO:0046849	bone remodeling	7/650	89/18862	0.0339004	0.236861	0.206195	SFRP1/TF/LEP/GDF5/TPH1/GREM1/PDK4	7
GO:0035812	renal sodium excretion	3/650	21/18862	0.0341373	0.236861	0.206195	DRD2/ATP6V1B1/CORIN	3
GO:0042438	melanin biosynthetic process	3/650	21/18862	0.0341373	0.236861	0.206195	OCA2/DCT/CITED1	3
GO:0043651	linoleic acid metabolic process	3/650	21/18862	0.0341373	0.236861	0.206195	ELOVL2/GSTM2/FADS2	3
GO:0048169	regulation of long-term neuronal synaptic plasticity	3/650	21/18862	0.0341373	0.236861	0.206195	DRD2/NETO1/KIT	3
GO:0071636	positive regulation of transforming growth factor beta production	3/650	21/18862	0.0341373	0.236861	0.206195	FERMT1/PTGS2/SERPINF2	3
GO:0072170	metanephric tubule development	3/650	21/18862	0.0341373	0.236861	0.206195	OSR1/SOX8/WNT7B	3
GO:0072311	glomerular epithelial cell differentiation	3/650	21/18862	0.0341373	0.236861	0.206195	KLF15/CD24/FOXC2	3
GO:1903429	regulation of cell maturation	3/650	21/18862	0.0341373	0.236861	0.206195	BCL11A/BNC1/BCL2	3
GO:0016054	organic acid catabolic process	15/650	258/18862	0.0343246	0.236901	0.20623	PRODH/HMGCLL1/KMO/CRYM/HGD/LEP/ALDH1L1/CNR1/IRS2/CRAT/GPT/MFSD2A/MAT1A/QPRT/ADHFE1	15
GO:0000578	embryonic axis specification	4/650	36/18862	0.0344123	0.236901	0.20623	LHX1/CITED1/MESP1/RIPPLY2	4
GO:0035136	forelimb morphogenesis	4/650	36/18862	0.0344123	0.236901	0.20623	OSR1/GDF5/ALX4/ZBTB16	4
GO:0071709	membrane assembly	4/650	36/18862	0.0344123	0.236901	0.20623	DMKN/TLCD1/CDH2/NLGN1	4
GO:2000310	regulation of NMDA receptor activity	4/650	36/18862	0.0344123	0.236901	0.20623	GRIA2/GRIA1/RGS9/NLGN1	4
GO:0050803	regulation of synapse structure or activity	13/650	214/18862	0.0346839	0.238338	0.207481	NEUROD2/NTRK2/LRFN2/DRD2/CHRNB2/PCDH8/BDNF/IL1RAPL2/CDH2/NLGN1/PAK3/SRCIN1/SIX1	13
GO:0032963	collagen metabolic process	8/650	109/18862	0.0347294	0.238338	0.207481	MMP1/KLK6/MMP13/MMP20/MMP11/CREB3L1/MMP24/SERPINF2	8
GO:0001659	temperature homeostasis	11/650	171/18862	0.0349302	0.239343	0.208356	DRD2/CIDEA/LEP/ADRB1/NOVA1/CNR1/HOXC10/PTGS2/KSR2/SCD/FOXC2	11
GO:0046394	carboxylic acid biosynthetic process	18/650	327/18862	0.0350282	0.239641	0.208615	FGFR4/KMO/PLP1/RGN/FA2H/ELOVL2/GSTM2/FADS2/GPT/CYP39A1/OLAH/NAGS/PTGS2/SCD/NAT8L/GGT1/PLA2G4F/PDK4	18
GO:0001706	endoderm formation	5/650	53/18862	0.0352971	0.240732	0.209565	LHX1/COL11A1/LAMA3/MESP1/ITGA7	5
GO:1905517	macrophage migration	5/650	53/18862	0.0352971	0.240732	0.209565	CXCL17/SAA1/AZU1/IL34/CX3CR1	5
GO:0021536	diencephalon development	6/650	71/18862	0.0354511	0.241035	0.209829	CNTNAP2/KCNC2/DRD2/CHRNB2/ARX/OTP	6
GO:2001259	positive regulation of cation channel activity	6/650	71/18862	0.0354511	0.241035	0.209829	LRRC26/KCNC2/RGS9/GSTM2/KCNIP2/STAC	6
GO:0007612	learning	9/650	130/18862	0.0360146	0.244488	0.212835	CNTNAP2/NEUROD2/NTRK2/DRD2/CHRNB2/SNAP25/NETO1/JPH3/KIT	9
GO:0008202	steroid metabolic process	18/650	329/18862	0.0368406	0.24971	0.217381	LRP2/STARD3/SERPINA6/UGT2B11/FGFR4/CYP24A1/BMP5/SULT4A1/MED1/UGT2B28/SERPINA12/LEP/CYP39A1/SCD/TM7SF2/NR1I2/KIT/SULT2B1	18
GO:0032413	negative regulation of ion transmembrane transporter activity	6/650	72/18862	0.0375942	0.253645	0.220807	OSR1/DRD2/CRHR1/GSTM2/EPO/KCNE5	6
GO:0042440	pigment metabolic process	6/650	72/18862	0.0375942	0.253645	0.220807	OCA2/AMBP/HPX/DCT/CITED1/BCL2	6
GO:0048708	astrocyte differentiation	6/650	72/18862	0.0375942	0.253645	0.220807	NKX2-2/S100A8/PLP1/S100A9/SOX8/SOX6	6
GO:0046622	positive regulation of organ growth	5/650	54/18862	0.0378391	0.254202	0.221291	TGFBR3/ARX/FGFR2/FGF2/WNT2	5
GO:0019932	second-messenger-mediated signaling	17/650	307/18862	0.0378511	0.254202	0.221291	NEUROD2/EDN3/KCNC2/CHRM3/ADCY1/RGN/RUNDC3A/GSTM2/PEX5L/MYOZ1/AZU1/KSR2/PTGFR/NMUR1/CX3CR1/DMD/SCT	17
GO:0002790	peptide secretion	21/650	401/18862	0.0384198	0.254202	0.221291	SFRP1/EDN3/KCNC2/DRD2/S100A8/ENHO/SAA1/FGB/LEP/CRHR1/FFAR2/CHGA/SNAP25/CNR1/IRS2/KRT20/KCNB1/ADRA2C/NNAT/SCT/RFX3	21
GO:0001835	blastocyst hatching	3/650	22/18862	0.0385434	0.254202	0.221291	PPP4R4/C6orf141/FBLL1	3
GO:0014821	phasic smooth muscle contraction	3/650	22/18862	0.0385434	0.254202	0.221291	EDN3/DRD2/KIT	3
GO:0035188	hatching	3/650	22/18862	0.0385434	0.254202	0.221291	PPP4R4/C6orf141/FBLL1	3
GO:0035994	response to muscle stretch	3/650	22/18862	0.0385434	0.254202	0.221291	TCAP/CDH2/DMD	3
GO:0048714	positive regulation of oligodendrocyte differentiation	3/650	22/18862	0.0385434	0.254202	0.221291	NKX2-2/PTPRZ1/IL34	3
GO:0060307	regulation of ventricular cardiac muscle cell membrane repolarization	3/650	22/18862	0.0385434	0.254202	0.221291	KCNH2/SCN5A/KCNE5	3
GO:0060343	trabecula formation	3/650	22/18862	0.0385434	0.254202	0.221291	SFRP1/TGFBR3/GREM1	3
GO:0071305	cellular response to vitamin D	3/650	22/18862	0.0385434	0.254202	0.221291	SFRP1/CYP24A1/MED1	3
GO:0071684	organism emergence from protective structure	3/650	22/18862	0.0385434	0.254202	0.221291	PPP4R4/C6orf141/FBLL1	3
GO:0072243	metanephric nephron epithelium development	3/650	22/18862	0.0385434	0.254202	0.221291	OSR1/SOX8/WNT7B	3
GO:0090335	regulation of brown fat cell differentiation	3/650	22/18862	0.0385434	0.254202	0.221291	LEP/PTGS2/SIX1	3
GO:1903077	negative regulation of protein localization to plasma membrane	3/650	22/18862	0.0385434	0.254202	0.221291	MRAP/LRRC15/MRAP2	3
GO:0030879	mammary gland development	9/650	132/18862	0.0391165	0.257595	0.224245	SOSTDC1/MED1/CSN3/FGFR2/AR/IRS2/TPH1/WNT7B/WNT2	9
GO:0030278	regulation of ossification	8/650	112/18862	0.0398151	0.261434	0.227587	SFRP1/OSR1/SOX11/TPH1/ZBTB16/GREM1/FZD9/BCL2	8
GO:0031016	pancreas development	6/650	73/18862	0.0398183	0.261434	0.227587	NKX2-2/MNX1/BMP5/ONECUT2/CDH2/RFX3	6
GO:0001755	neural crest cell migration	5/650	55/18862	0.0404903	0.26449	0.230247	EDN3/FOLR1/SOX8/NRTN/SEMA6A	5
GO:0050729	positive regulation of inflammatory response	9/650	133/18862	0.0407335	0.26449	0.230247	NPY5R/C2CD4A/S100A8/LBP/S100A9/FFAR2/TSLP/CNR1/PTGS2	9
GO:0000187	activation of MAPK activity	10/650	154/18862	0.0407804	0.26449	0.230247	TF/CXCL17/NTRK3/SAA1/FGF2/PAK3/EPGN/BIRC7/NTF3/KIT	10
GO:1905039	carboxylic acid transmembrane transport	10/650	154/18862	0.0407804	0.26449	0.230247	LRP2/SLC6A15/SLC7A4/SLC16A11/SLC7A3/FOLR1/IRS2/SLC25A18/SLC38A4/SLC13A5	10
GO:0007204	positive regulation of cytosolic calcium ion concentration	17/650	310/18862	0.0408711	0.26449	0.230247	RIC3/DRD2/SAA1/CCKBR/CNR1/GSTM2/EPO/CD24/FGF2/PTGFR/JPH3/CX3CR1/RYR1/TACR1/BCL2/DMD/OPRL1	17
GO:0030279	negative regulation of ossification	4/650	38/18862	0.040885	0.26449	0.230247	SFRP1/TPH1/GREM1/BCL2	4
GO:0042417	dopamine metabolic process	4/650	38/18862	0.040885	0.26449	0.230247	DRD2/CHRNB2/MAOA/MAOB	4
GO:0048246	macrophage chemotaxis	4/650	38/18862	0.040885	0.26449	0.230247	CXCL17/SAA1/AZU1/IL34	4
GO:0048286	lung alveolus development	4/650	38/18862	0.040885	0.26449	0.230247	ABCA12/ITGB6/FOXA1/FGFR2	4
GO:0051154	negative regulation of striated muscle cell differentiation	4/650	38/18862	0.040885	0.26449	0.230247	CEACAM5/PI16/BDNF/SOX6	4
GO:0014013	regulation of gliogenesis	7/650	93/18862	0.0415336	0.268021	0.233321	LRP2/NKX2-2/PTPRZ1/SOX11/SOX8/LIN28A/IL34	7
GO:0006941	striated muscle contraction	11/650	176/18862	0.0416544	0.268021	0.233321	TCAP/CHGA/GSTM2/KCNH2/CHRNA1/STAC/KCND3/MB/SCN5A/KCNE5/DMD	11
GO:0048839	inner ear development	11/650	176/18862	0.0416544	0.268021	0.233321	TCAP/COL2A1/FREM2/COL11A1/FGFR2/KCNK3/ATP6V1B1/SLC25A27/DLX6/SIX1/TMIE	11
GO:1903825	organic acid transmembrane transport	10/650	155/18862	0.0423118	0.268021	0.233321	LRP2/SLC6A15/SLC7A4/SLC16A11/SLC7A3/FOLR1/IRS2/SLC25A18/SLC38A4/SLC13A5	10
GO:0008584	male gonad development	9/650	134/18862	0.0423952	0.268021	0.233321	LRP2/SFRP1/TEX19/SOX8/AR/FGF9/ADAM29/BCL2/KIT	9
GO:0016053	organic acid biosynthetic process	18/650	335/18862	0.0426897	0.268021	0.233321	FGFR4/KMO/PLP1/RGN/FA2H/ELOVL2/GSTM2/FADS2/GPT/CYP39A1/OLAH/NAGS/PTGS2/SCD/NAT8L/GGT1/PLA2G4F/PDK4	18
GO:0001558	regulation of cell growth	21/650	406/18862	0.0428953	0.268021	0.233321	ERBB2/SFRP1/S100A8/KRT17/BCL11A/S100A9/PI16/BDNF/FAM107A/RIMS1/CRYAB/GREM1/MFSD2A/SGK3/NANOS1/RND2/RERG/BCL2/IGFBP1/SGK2/SEMA6A	21
GO:0032098	regulation of appetite	3/650	23/18862	0.0432237	0.268021	0.233321	LEP/NPY/SCT	3
GO:0044550	secondary metabolite biosynthetic process	3/650	23/18862	0.0432237	0.268021	0.233321	OCA2/DCT/CITED1	3
GO:0060561	apoptotic process involved in morphogenesis	3/650	23/18862	0.0432237	0.268021	0.233321	FOXC1/CRYAB/FOXC2	3
GO:0070977	bone maturation	3/650	23/18862	0.0432237	0.268021	0.233321	LEP/GREM1/RYR1	3
GO:0071676	negative regulation of mononuclear cell migration	3/650	23/18862	0.0432237	0.268021	0.233321	BMP5/GREM1/IL27RA	3
GO:0097186	amelogenesis	3/650	23/18862	0.0432237	0.268021	0.233321	ITGB6/MMP20/KLK4	3
GO:0060135	maternal process involved in female pregnancy	5/650	56/18862	0.0432514	0.268021	0.233321	DSG1/MED1/STC2/CNR1/AR	5
GO:0021549	cerebellum development	7/650	94/18862	0.0436025	0.268021	0.233321	NEUROD2/LHX1/FAIM2/FOXC1/NANOS1/SCN5A/TRNP1	7
GO:0021543	pallium development	10/650	156/18862	0.043882	0.268021	0.233321	CNTNAP2/NTRK2/BCAN/ARX/MFSD2A/IGF2BP1/NPY/CDH2/CDON/SCT	10
GO:0030856	regulation of epithelial cell differentiation	10/650	156/18862	0.043882	0.268021	0.233321	OSR1/LHX1/MED1/FOXC1/CD24/FGF2/CITED1/MESP1/SULT2B1/RFX3	10
GO:0046546	development of primary male sexual characteristics	9/650	135/18862	0.0441018	0.268021	0.233321	LRP2/SFRP1/TEX19/SOX8/AR/FGF9/ADAM29/BCL2/KIT	9
GO:0030049	muscle filament sliding	4/650	39/18862	0.0443623	0.268021	0.233321	TCAP/MYBPC1/MYBPC2/DMD	4
GO:0033275	actin-myosin filament sliding	4/650	39/18862	0.0443623	0.268021	0.233321	TCAP/MYBPC1/MYBPC2/DMD	4
GO:0086091	regulation of heart rate by cardiac conduction	4/650	39/18862	0.0443623	0.268021	0.233321	KCNH2/KCND3/SCN5A/KCNE5	4
GO:0001660	fever generation	2/650	10/18862	0.0444163	0.268021	0.233321	CNR1/PTGS2	2
GO:0001820	serotonin secretion	2/650	10/18862	0.0444163	0.268021	0.233321	CNR1/MAOB	2
GO:0002024	diet induced thermogenesis	2/650	10/18862	0.0444163	0.268021	0.233321	ADRB1/SCT	2
GO:0014041	regulation of neuron maturation	2/650	10/18862	0.0444163	0.268021	0.233321	BCL11A/BCL2	2
GO:0019614	catechol-containing compound catabolic process	2/650	10/18862	0.0444163	0.268021	0.233321	MAOA/MAOB	2
GO:0021520	spinal cord motor neuron cell fate specification	2/650	10/18862	0.0444163	0.268021	0.233321	MNX1/HOXC10	2
GO:0021702	cerebellar Purkinje cell differentiation	2/650	10/18862	0.0444163	0.268021	0.233321	LHX1/FAIM2	2
GO:0021892	cerebral cortex GABAergic interneuron differentiation	2/650	10/18862	0.0444163	0.268021	0.233321	DRD2/ARX	2
GO:0031652	positive regulation of heat generation	2/650	10/18862	0.0444163	0.268021	0.233321	CNR1/PTGS2	2
GO:0033033	negative regulation of myeloid cell apoptotic process	2/650	10/18862	0.0444163	0.268021	0.233321	EPO/BCL2	2
GO:0042135	neurotransmitter catabolic process	2/650	10/18862	0.0444163	0.268021	0.233321	MAOA/MAOB	2
GO:0042424	catecholamine catabolic process	2/650	10/18862	0.0444163	0.268021	0.233321	MAOA/MAOB	2
GO:0048340	paraxial mesoderm morphogenesis	2/650	10/18862	0.0444163	0.268021	0.233321	FOXC1/FOXC2	2
GO:0048672	positive regulation of collateral sprouting	2/650	10/18862	0.0444163	0.268021	0.233321	BDNF/RND2	2
GO:0048703	embryonic viscerocranium morphogenesis	2/650	10/18862	0.0444163	0.268021	0.233321	LHX1/FOXC2	2
GO:0060068	vagina development	2/650	10/18862	0.0444163	0.268021	0.233321	LRP2/LHX1	2
GO:0060272	embryonic skeletal joint morphogenesis	2/650	10/18862	0.0444163	0.268021	0.233321	COL2A1/OSR1	2
GO:0060736	prostate gland growth	2/650	10/18862	0.0444163	0.268021	0.233321	FGFR2/AR	2
GO:0070327	thyroid hormone transport	2/650	10/18862	0.0444163	0.268021	0.233321	CRYM/ABCC2	2
GO:0070561	vitamin D receptor signaling pathway	2/650	10/18862	0.0444163	0.268021	0.233321	CYP24A1/MED1	2
GO:0070942	neutrophil mediated cytotoxicity	2/650	10/18862	0.0444163	0.268021	0.233321	AZU1/DNASE1L3	2
GO:0071313	cellular response to caffeine	2/650	10/18862	0.0444163	0.268021	0.233321	GSTM2/RYR1	2
GO:0072178	nephric duct morphogenesis	2/650	10/18862	0.0444163	0.268021	0.233321	OSR1/LHX1	2
GO:0106072	negative regulation of adenylate cyclase-activating G protein-coupled receptor signaling pathway	2/650	10/18862	0.0444163	0.268021	0.233321	MRAP/MRAP2	2
GO:1900003	regulation of serine-type endopeptidase activity	2/650	10/18862	0.0444163	0.268021	0.233321	ANXA8L1/ANXA8	2
GO:1902337	regulation of apoptotic process involved in morphogenesis	2/650	10/18862	0.0444163	0.268021	0.233321	FOXC1/FOXC2	2
GO:1902571	regulation of serine-type peptidase activity	2/650	10/18862	0.0444163	0.268021	0.233321	ANXA8L1/ANXA8	2
GO:1904350	regulation of protein catabolic process in the vacuole	2/650	10/18862	0.0444163	0.268021	0.233321	LRP2/RNF128	2
GO:0060078	regulation of postsynaptic membrane potential	9/650	136/18862	0.0458538	0.275938	0.240213	GRIA1/DRD2/CHRNB2/ADRB1/NETO1/RIMS1/CHRNA1/CELF4/NLGN1	9
GO:1903305	regulation of regulated secretory pathway	9/650	136/18862	0.0458538	0.275938	0.240213	DRD2/ADCY1/CNR1/SYN1/RIMS1/KCNB1/TRIM9/DOC2A/NLGN1	9
GO:0007369	gastrulation	11/650	179/18862	0.0460924	0.276995	0.241133	SFRP1/OSR1/LHX1/COL11A1/FGFR2/FOXC1/LAMA3/FOXC2/MESP1/CRB2/ITGA7	11
GO:0002792	negative regulation of peptide secretion	6/650	76/18862	0.0469831	0.280684	0.244345	SFRP1/DRD2/ENHO/LEP/CHGA/KCNB1	6
GO:0086001	cardiac muscle cell action potential	6/650	76/18862	0.0469831	0.280684	0.244345	KCNH2/KCNIP2/KCND3/SCN5A/KCNE5/DMD	6
GO:0051604	protein maturation	16/650	293/18862	0.0477345	0.280684	0.244345	PCSK1/FGB/KLK6/PRSS12/PCSK1N/MYRFL/TMPRSS4/KLK13/PCSK6/GGT1/CYFIP2/NNAT/CISD3/CORIN/PRSS3/SERPINF2	16
GO:0006308	DNA catabolic process	4/650	40/18862	0.0480001	0.280684	0.244345	RGN/CIDEA/DNASE1L3/DNASE2B	4
GO:0030521	androgen receptor signaling pathway	4/650	40/18862	0.0480001	0.280684	0.244345	SCGB2A2/SFRP1/SCGB2A1/AR	4
GO:0042908	xenobiotic transport	4/650	40/18862	0.0480001	0.280684	0.244345	ABCC11/PDZK1/ABCC2/NR1I2	4
GO:0046717	acid secretion	4/650	40/18862	0.0480001	0.280684	0.244345	DRD2/ABCC2/CCKBR/SCT	4
GO:0055023	positive regulation of cardiac muscle tissue growth	4/650	40/18862	0.0480001	0.280684	0.244345	TGFBR3/FGFR2/FGF2/WNT2	4
GO:0060443	mammary gland morphogenesis	4/650	40/18862	0.0480001	0.280684	0.244345	SOSTDC1/MED1/FGFR2/AR	4
GO:0001963	synaptic transmission, dopaminergic	3/650	24/18862	0.0481738	0.280684	0.244345	DRD2/CHRNB2/SLC6A2	3
GO:0006309	apoptotic DNA fragmentation	3/650	24/18862	0.0481738	0.280684	0.244345	CIDEA/DNASE1L3/DNASE2B	3
GO:0015874	norepinephrine transport	3/650	24/18862	0.0481738	0.280684	0.244345	SLC6A2/KCNB1/ADRA2C	3
GO:0040037	negative regulation of fibroblast growth factor receptor signaling pathway	3/650	24/18862	0.0481738	0.280684	0.244345	CREB3L1/FGF2/NGFR	3
GO:0043567	regulation of insulin-like growth factor receptor signaling pathway	3/650	24/18862	0.0481738	0.280684	0.244345	BMP5/AR/IGFBP1	3
GO:0044321	response to leptin	3/650	24/18862	0.0481738	0.280684	0.244345	LRP2/FGB/LEP	3
GO:0045662	negative regulation of myoblast differentiation	3/650	24/18862	0.0481738	0.280684	0.244345	SOSTDC1/SOX8/CMTM5	3
GO:0051923	sulfation	3/650	24/18862	0.0481738	0.280684	0.244345	SULT4A1/CHST4/SULT2B1	3
GO:0060037	pharyngeal system development	3/650	24/18862	0.0481738	0.280684	0.244345	BMP5/FOLR1/SIX1	3
GO:0060074	synapse maturation	3/650	24/18862	0.0481738	0.280684	0.244345	NEUROD2/BCAN/CX3CR1	3
GO:0060669	embryonic placenta morphogenesis	3/650	24/18862	0.0481738	0.280684	0.244345	BMP5/FGFR2/WNT7B	3
GO:0061436	establishment of skin barrier	3/650	24/18862	0.0481738	0.280684	0.244345	ABCA12/KRT16/FA2H	3
GO:1904376	negative regulation of protein localization to cell periphery	3/650	24/18862	0.0481738	0.280684	0.244345	MRAP/LRRC15/MRAP2	3
GO:1905523	positive regulation of macrophage migration	3/650	24/18862	0.0481738	0.280684	0.244345	CXCL17/IL34/CX3CR1	3
GO:2000241	regulation of reproductive process	10/650	159/18862	0.0488286	0.284123	0.247338	SFRP1/ZP2/RGN/BNC1/CNR1/AR/TPPP2/CCDC87/NPM2/TACR1	10
GO:0046890	regulation of lipid biosynthetic process	12/650	203/18862	0.0490602	0.284928	0.248039	ORMDL3/FGFR4/BMP5/ENHO/SERPINA12/RGN/LEP/MFSD2A/PTGS2/SCD/TM7SF2/PDK4	12
GO:0015850	organic hydroxy compound transport	15/650	271/18862	0.0490964	0.284928	0.248039	ABCA12/STARD3/ABCC11/DRD2/CHRNB2/LEP/CRHR1/CHGA/ABCC2/CNR1/SLCO1A2/MAOB/SLC6A2/KCNB1/ADRA2C	15
GO:0030534	adult behavior	8/650	117/18862	0.0493507	0.286026	0.248995	CNTNAP2/DRD2/CHRNB2/DMBX1/LEP/ATP6V1B1/NPY/EFNB3	8
GO:0009953	dorsal/ventral pattern formation	6/650	77/18862	0.0495374	0.286354	0.24928	NKX2-2/SFRP1/SOSTDC1/LHX1/FOXA1/GREM1	6
GO:1901616	organic hydroxy compound catabolic process	6/650	77/18862	0.0495374	0.286354	0.24928	CYP24A1/ALDH3B2/AKR1B10/MAOA/MAOB/CYP39A1	6

## Sheet: GO CC
ID	Description	GeneRatio	BgRatio	pvalue	p.adjust	qvalue	geneID	Count
GO:0008076	voltage-gated potassium channel complex	15/688	89/19520	4.68648e-07	0.000200581	0.000179073	CNTNAP2/LRRC26/KCNC2/KCNJ16/SNAP25/KCNK1/KCNIP1/KCNQ5/KCNH2/KCNIP2/KCNB1/KCND3/KCNS1/KCNE5/KCNQ3	15
GO:0034703	cation channel complex	24/688	222/19520	1.16487e-06	0.000249281	0.000222551	GRIA2/CNTNAP2/LRRC26/KCNC2/GRIA1/KCNJ16/SCNN1G/SNAP25/KCNK1/UNC80/KCNIP1/KCNQ5/CATSPERB/KCNH2/KCNIP2/KCNB1/KCND3/KCNS1/NLGN1/SCN5A/KCNE5/RYR1/SCN3A/KCNQ3	24
GO:0034705	potassium channel complex	15/688	99/19520	1.90856e-06	0.000269646	0.000240732	CNTNAP2/LRRC26/KCNC2/KCNJ16/SNAP25/KCNK1/KCNIP1/KCNQ5/KCNH2/KCNIP2/KCNB1/KCND3/KCNS1/KCNE5/KCNQ3	15
GO:0062023	collagen-containing extracellular matrix	35/688	423/19520	2.88892e-06	0.000269646	0.000240732	SFRP1/S100A7/COL2A1/FREM2/ANXA8/S100A8/COL9A1/ZP2/FGB/COL11A1/SERPINA3/S100A9/AMBP/HPX/FIBCD1/FGFR2/NDP/LEFTY2/PCSK6/COL10A1/FGF9/EMILIN3/GREM1/ANGPTL7/LAMA3/LAD1/COL27A1/CDH2/ZG16/LRRC15/ZP1/CDON/WNT2/ADAMTS8/SERPINF2	35
GO:0034702	ion channel complex	28/688	301/19520	3.15007e-06	0.000269646	0.000240732	GRIA2/GABRP/CNTNAP2/LRRC26/KCNC2/GRIA1/KCNJ16/SCNN1G/CHRNB2/SNAP25/KCNK1/UNC80/KCNIP1/KCNQ5/CATSPERB/KCNH2/KCNIP2/KCNB1/CHRNA1/TTYH1/KCND3/KCNS1/NLGN1/SCN5A/KCNE5/RYR1/SCN3A/KCNQ3	28
GO:1902495	transmembrane transporter complex	29/688	323/19520	4.25694e-06	0.000303662	0.0002711	GRIA2/GABRP/CNTNAP2/LRRC26/KCNC2/GRIA1/KCNJ16/SCNN1G/CHRNB2/SNAP25/KCNK1/UNC80/KCNIP1/KCNQ5/CATSPERB/KCNH2/KCNIP2/KCNB1/CHRNA1/TTYH1/KCND3/KCNS1/NLGN1/SCN5A/KCNE5/RYR1/SCN3A/KCNQ3/ATP12A	29
GO:1990351	transporter complex	29/688	338/19520	1.02433e-05	0.000626302	0.000559144	GRIA2/GABRP/CNTNAP2/LRRC26/KCNC2/GRIA1/KCNJ16/SCNN1G/CHRNB2/SNAP25/KCNK1/UNC80/KCNIP1/KCNQ5/CATSPERB/KCNH2/KCNIP2/KCNB1/CHRNA1/TTYH1/KCND3/KCNS1/NLGN1/SCN5A/KCNE5/RYR1/SCN3A/KCNQ3/ATP12A	29
GO:0097060	synaptic membrane	30/688	368/19520	1.94877e-05	0.00104259	0.000930793	GRIA2/GABRP/LRFN2/KCNC2/GRIA1/DRD2/SHC4/CHRM3/FAIM2/ADCY1/CHRNB2/PCDH8/SNAP25/KCNK1/NETO1/SNAP91/CNR1/RGS9/RIMS1/CRYAB/CNKSR2/SLC6A2/KCNB1/CHRNA1/KCND3/CDH2/NLGN1/EFNB3/ADRA2C/DMD	30
GO:0014069	postsynaptic density	26/688	313/19520	5.03142e-05	0.00235651	0.00210382	GRIA2/NTRK2/LRFN2/GRIA1/DRD2/BCAS1/ADCY1/BCL11A/DLGAP1/SYN2/NETO1/SYN1/RGS9/CRYAB/CNKSR2/BSN/ADD2/KCND3/CDH2/NLGN1/PAK3/EFNB3/SRCIN1/DNAJC6/ADRA2C/NGFR	26
GO:0099572	postsynaptic specialization	27/688	333/19520	5.50586e-05	0.00235651	0.00210382	GRIA2/NTRK2/LRFN2/GRIA1/DRD2/BCAS1/ADCY1/BCL11A/DLGAP1/SYN2/NETO1/SYN1/RGS9/CRYAB/CNKSR2/BSN/CHRNA1/ADD2/KCND3/CDH2/NLGN1/PAK3/EFNB3/SRCIN1/DNAJC6/ADRA2C/NGFR	27
GO:0032279	asymmetric synapse	26/688	318/19520	6.55208e-05	0.00247433	0.00220901	GRIA2/NTRK2/LRFN2/GRIA1/DRD2/BCAS1/ADCY1/BCL11A/DLGAP1/SYN2/NETO1/SYN1/RGS9/CRYAB/CNKSR2/BSN/ADD2/KCND3/CDH2/NLGN1/PAK3/EFNB3/SRCIN1/DNAJC6/ADRA2C/NGFR	26
GO:0045211	postsynaptic membrane	23/688	265/19520	6.93737e-05	0.00247433	0.00220901	GRIA2/GABRP/LRFN2/KCNC2/GRIA1/DRD2/SHC4/CHRM3/FAIM2/ADCY1/CHRNB2/PCDH8/NETO1/RGS9/CNKSR2/KCNB1/CHRNA1/KCND3/CDH2/NLGN1/EFNB3/ADRA2C/DMD	23
GO:0099060	integral component of postsynaptic specialization membrane	10/688	66/19520	9.82906e-05	0.00323603	0.00288903	LRFN2/GRIA1/ADCY1/NETO1/CHRNA1/KCND3/CDH2/NLGN1/EFNB3/ADRA2C	10
GO:0099634	postsynaptic specialization membrane	13/688	109/19520	0.00012065	0.00368844	0.00329293	GRIA2/LRFN2/GRIA1/ADCY1/NETO1/RGS9/CNKSR2/CHRNA1/KCND3/CDH2/NLGN1/EFNB3/ADRA2C	13
GO:0098948	intrinsic component of postsynaptic specialization membrane	10/688	69/19520	0.000144081	0.00411111	0.00367027	LRFN2/GRIA1/ADCY1/NETO1/CHRNA1/KCND3/CDH2/NLGN1/EFNB3/ADRA2C	10
GO:0099055	integral component of postsynaptic membrane	12/688	100/19520	0.000205812	0.00534124	0.00476849	LRFN2/GRIA1/DRD2/ADCY1/PCDH8/NETO1/CHRNA1/KCND3/CDH2/NLGN1/EFNB3/ADRA2C	12
GO:0098984	neuron to neuron synapse	26/688	342/19520	0.000212152	0.00534124	0.00476849	GRIA2/NTRK2/LRFN2/GRIA1/DRD2/BCAS1/ADCY1/BCL11A/DLGAP1/SYN2/NETO1/SYN1/RGS9/CRYAB/CNKSR2/BSN/ADD2/KCND3/CDH2/NLGN1/PAK3/EFNB3/SRCIN1/DNAJC6/ADRA2C/NGFR	26
GO:0016324	apical plasma membrane	26/688	351/19520	0.000317804	0.00734261	0.00655525	ERBB2/CEACAM6/CEACAM5/LRP2/ABCC11/TF/DSG1/CEACAM7/KCNC2/PDZK1/MGAM/SCNN1G/CD300LG/TRPM6/FOLR1/ATP6V1B1/ABCC2/KCNK1/CLCA4/LCT/CRB1/AMN/CDH2/SORBS2/UMODL1/CRB2	26
GO:0098936	intrinsic component of postsynaptic membrane	12/688	105/19520	0.000325957	0.00734261	0.00655525	LRFN2/GRIA1/DRD2/ADCY1/PCDH8/NETO1/CHRNA1/KCND3/CDH2/NLGN1/EFNB3/ADRA2C	12
GO:0099699	integral component of synaptic membrane	13/688	128/19520	0.000593848	0.0127084	0.0113456	LRFN2/GRIA1/DRD2/ADCY1/PCDH8/NETO1/CNR1/CHRNA1/KCND3/CDH2/NLGN1/EFNB3/ADRA2C	13
GO:0045177	apical part of cell	28/688	414/19520	0.000809047	0.0164891	0.014721	ERBB2/CEACAM6/CEACAM5/LRP2/ABCC11/TF/DSG1/CEACAM7/KCNC2/PDZK1/MGAM/SCNN1G/CD300LG/TRPM6/FOLR1/EDAR/ATP6V1B1/ABCC2/KCNK1/SLC25A27/CLCA4/LCT/CRB1/AMN/CDH2/SORBS2/UMODL1/CRB2	28
GO:0099240	intrinsic component of synaptic membrane	13/688	140/19520	0.00137161	0.0266841	0.0238228	LRFN2/GRIA1/DRD2/ADCY1/PCDH8/NETO1/CNR1/CHRNA1/KCND3/CDH2/NLGN1/EFNB3/ADRA2C	13
GO:0031253	cell projection membrane	23/688	337/19520	0.00203492	0.0378673	0.0338067	LRP2/CNTNAP2/S100P/KCNC2/GRIA1/PDZK1/DRD2/UNC5A/FERMT1/TRPM6/FOLR1/CNGA2/ABCC2/FAM107A/KCNK1/KCNB1/AMN/PDE6B/TTYH1/FZD9/PLA2G4F/PSD2/DMD	23
GO:0032809	neuronal cell body membrane	5/688	28/19520	0.0026857	0.0445403	0.0397642	KCNC2/UNC5A/SLC6A2/KCNB1/CX3CR1	5
GO:0019897	extrinsic component of plasma membrane	14/688	169/19520	0.00269335	0.0445403	0.0397642	TF/CDH19/EPN3/SNAP25/SNAP91/GNAO1/KCNIP1/CNKSR2/CDHR3/STAC/CDH2/CDH12/CDH20/WNT2	14
GO:0019898	extrinsic component of membrane	21/688	304/19520	0.00270572	0.0445403	0.0397642	TF/CDH19/OSR1/EPN3/SNAP25/ATP6V1B1/SNAP91/GNAO1/SYN1/KCNIP1/HID1/AZU1/CNKSR2/RGS6/CDHR3/STAC/DOC2A/CDH2/CDH12/CDH20/WNT2	21
GO:0098839	postsynaptic density membrane	9/688	86/19520	0.00326455	0.0517491	0.0462	GRIA2/LRFN2/GRIA1/ADCY1/NETO1/RGS9/CNKSR2/EFNB3/ADRA2C	9
GO:0044298	cell body membrane	5/688	31/19520	0.00425671	0.0650668	0.0580897	KCNC2/UNC5A/SLC6A2/KCNB1/CX3CR1	5
GO:0031526	brush border membrane	7/688	59/19520	0.00455665	0.0672499	0.0600387	LRP2/PDZK1/TRPM6/FOLR1/ABCC2/KCNK1/AMN	7
GO:0016342	catenin complex	5/688	32/19520	0.00490123	0.0699242	0.0624262	CDH19/CDHR3/CDH2/CDH12/CDH20	5
GO:0060076	excitatory synapse	6/688	46/19520	0.00529084	0.0730477	0.0652148	GRIA2/GRIA1/FGFR2/NETO1/BSN/NLGN1	6
GO:0099061	integral component of postsynaptic density membrane	6/688	47/19520	0.00588835	0.0787567	0.0703116	LRFN2/GRIA1/ADCY1/NETO1/EFNB3/ADRA2C	6
GO:0098978	glutamatergic synapse	20/688	308/19520	0.00665185	0.0862724	0.0770214	GRIA1/DRD2/BCAN/ADCY1/PCDH8/DLGAP1/SNAP25/SYN2/NETO1/CNR1/RGS9/CNKSR2/BSN/IL1RAPL2/FZD9/NLGN1/PAK3/EFNB3/ADRA2C/PSD2	20
GO:0005583	fibrillar collagen trimer	3/688	12/19520	0.00755802	0.0922571	0.0823643	COL2A1/COL11A1/COL27A1	3
GO:0098643	banded collagen fibril	3/688	12/19520	0.00755802	0.0922571	0.0823643	COL2A1/COL11A1/COL27A1	3
GO:0042383	sarcolemma	11/688	134/19520	0.00787759	0.0922571	0.0823643	SLC27A6/AQP4/KCNB1/STAC/KCND3/CDH2/SCN5A/RYR1/MYOT/OBSCN/DMD	11
GO:0099146	intrinsic component of postsynaptic density membrane	6/688	50/19520	0.00797549	0.0922571	0.0823643	LRFN2/GRIA1/ADCY1/NETO1/EFNB3/ADRA2C	6
GO:0009897	external side of plasma membrane	24/688	402/19520	0.00871692	0.0981801	0.0876522	CEACAM5/GRIA2/LRP2/TF/ITGB6/FGB/SCNN1G/CHRNB2/TGFBR3/FOLR1/CD1A/SCARA5/AQP4/CD24/CD1C/ADAM29/ASTN1/NLGN1/MOG/CX3CR1/CD1E/IL27RA/WNT2/KIT	24
GO:0005882	intermediate filament	15/688	215/19520	0.009441	0.102233	0.0912708	CASP14/KRT6B/KRT14/KRT5/KRT17/KRT15/KRT16/KRT23/GFAP/KRT31/KRT24/KRT20/UPP2/KRT79/KRT77	15
GO:0045111	intermediate filament cytoskeleton	17/688	256/19520	0.00955452	0.102233	0.0912708	CASP14/KRT6B/KRT14/KRT5/S100A8/KRT17/KRT15/KRT16/KRT23/GFAP/KRT31/KRT24/KRT20/UPP2/KRT79/NR1I2/KRT77	17
GO:0045178	basal part of cell	17/688	258/19520	0.0102722	0.107232	0.0957332	ERBB2/CEACAM5/CLCA2/TF/KRT14/KCNC2/KCNJ16/CHRM3/CD300LG/FOLR1/ATP6V1B1/CA11/AQP4/CLDN19/SLC4A4/FRMPD2/CDH2	17
GO:0030057	desmosome	4/688	25/19520	0.0107318	0.109362	0.0976354	DSG1/DSC3/DSG3/POF1B	4
GO:0009925	basal plasma membrane	16/688	240/19520	0.0113059	0.112533	0.100466	ERBB2/CEACAM5/CLCA2/TF/KCNC2/KCNJ16/CHRM3/CD300LG/FOLR1/ATP6V1B1/CA11/AQP4/CLDN19/SLC4A4/FRMPD2/CDH2	16
GO:0043209	myelin sheath	5/688	42/19520	0.0155313	0.151077	0.134877	ERBB2/NCMAP/PLP1/GNAO1/BCL2	5
GO:0001533	cornified envelope	5/688	45/19520	0.0204755	0.190734	0.170281	DSG1/DSC3/IVL/DSG3/SPRR3	5
GO:0042599	lamellar body	3/688	17/19520	0.0204994	0.190734	0.170281	ABCA12/KLK7/KRTDAP	3
GO:0016328	lateral plasma membrane	6/688	62/19520	0.0216959	0.194192	0.173369	DSG1/DRD2/ATP6V1B1/KCNB1/SCN5A/DMD	6
GO:0008305	integrin complex	4/688	31/19520	0.0226208	0.194192	0.173369	ITGB6/PLP1/ITGB8/ITGA7	4
GO:0060205	cytoplasmic vesicle lumen	19/688	326/19520	0.0227519	0.194192	0.173369	CRISP3/TF/S100A7/PSMD3/S100P/PTX3/S100A8/PCSK1/FGB/SERPINA3/SCG3/S100A9/LEFTY2/BPI/CHI3L1/AZU1/CAMP/ZG16/SERPINF2	19
GO:0005911	cell-cell junction	26/688	485/19520	0.0230023	0.194192	0.173369	CNTNAP2/DSG1/CDH19/DSC3/FGFR4/DSG3/FAT2/POF1B/GJB1/KIRREL2/ABCC2/CLDN16/CLDN19/WNK3/CRB1/HEPACAM/CDHR3/RND1/FRMPD2/CDH2/CDH12/SCN5A/CDH20/OBSCN/NGFR/KIT	26
GO:0042734	presynaptic membrane	10/688	137/19520	0.0232871	0.194192	0.173369	KCNC2/DRD2/PCDH8/SNAP25/SNAP91/CNR1/RIMS1/SLC6A2/CDH2/EFNB3	10
GO:0031527	filopodium membrane	3/688	18/19520	0.0239684	0.194192	0.173369	TTYH1/FZD9/DMD	3
GO:0031983	vesicle lumen	19/688	328/19520	0.0240472	0.194192	0.173369	CRISP3/TF/S100A7/PSMD3/S100P/PTX3/S100A8/PCSK1/FGB/SERPINA3/SCG3/S100A9/LEFTY2/BPI/CHI3L1/AZU1/CAMP/ZG16/SERPINF2	19
GO:0005796	Golgi lumen	8/688	102/19520	0.0276757	0.219356	0.195834	MUCL1/MUC19/BCAN/PCSK6/MMP11/MUC21/ZG16/WNT7B	8
GO:0030018	Z disc	9/688	122/19520	0.028691	0.223268	0.199327	TCAP/MYOZ1/CRYAB/SORBS2/SCN5A/RYR1/MYOT/OBSCN/DMD	9
GO:0043025	neuronal cell body	25/688	474/19520	0.0301275	0.22862	0.204105	GRIA2/CNTNAP2/RIC3/KCNC2/GRIA1/DRD2/UNC5A/DNER/TMPRSS3/KCNK1/SLC25A27/TMPRSS5/CRYAB/CNKSR2/SLC6A2/KIF5A/KCNB1/KCND3/ASTN1/ADRA2C/CX3CR1/PDE1C/MYOT/PSD2/NGFR	25
GO:0098685	Schaffer collateral - CA1 synapse	6/688	67/19520	0.030447	0.22862	0.204105	LRFN2/ADCY1/ADRB1/SYN2/SYN1/BSN	6
GO:0098644	complex of collagen trimers	3/688	21/19520	0.036148	0.260758	0.232796	COL2A1/COL11A1/COL27A1	3
GO:0016323	basolateral plasma membrane	13/688	211/19520	0.0367177	0.260758	0.232796	ERBB2/CEACAM5/KCNC2/KCNJ16/CD300LG/FOLR1/ATP6V1B1/CA11/AQP4/CLDN19/SLC4A4/FRMPD2/CDH2	13
GO:0098636	protein complex involved in cell adhesion	4/688	36/19520	0.0369304	0.260758	0.232796	ITGB6/PLP1/ITGB8/ITGA7	4
GO:0034774	secretory granule lumen	18/688	322/19520	0.037164	0.260758	0.232796	CRISP3/TF/S100A7/PSMD3/S100P/PTX3/S100A8/PCSK1/FGB/SERPINA3/SCG3/S100A9/LEFTY2/BPI/CHI3L1/AZU1/CAMP/SERPINF2	18
GO:0098793	presynapse	25/688	487/19520	0.0395765	0.273205	0.243909	NTRK2/KCNC2/GRIA1/DRD2/PRSS12/PCDH8/BDNF/SNAP25/SYN2/ATP6V1B1/SNAP91/CNR1/SYN1/RIMS1/SLC6A2/BSN/TRIM9/DOC2A/CDH2/NLGN1/EFNB3/SRCIN1/DNAJC6/ADRA2C/NTF3	25
GO:0031233	intrinsic component of external side of plasma membrane	3/688	23/19520	0.0457181	0.310593	0.277288	CEACAM5/FOLR1/CD24	3
GO:0008021	synaptic vesicle	12/688	197/19520	0.0468089	0.313034	0.279468	GRIA1/DRD2/BDNF/SNAP25/SYN2/ATP6V1B1/SNAP91/SYN1/BSN/TRIM9/DOC2A/NTF3	12
GO:0031674	I band	9/688	134/19520	0.0477115	0.314162	0.280474	TCAP/MYOZ1/CRYAB/SORBS2/SCN5A/RYR1/MYOT/OBSCN/DMD	9

## Sheet: GO MF
ID	Description	GeneRatio	BgRatio	pvalue	p.adjust	qvalue	geneID	Count
GO:0004252	serine-type endopeptidase activity	22/672	168/18337	2.2872e-07	0.000164907	0.000149511	KLK10/KLK11/PRSS50/MMP1/KLK7/PCSK1/KLK6/PRSS12/PRSS33/TMPRSS3/TMPRSS4/KLK14/KLK13/PCSK6/KLK4/OVCH2/TMPRSS5/AZU1/TMPRSS11E/PRSS51/CORIN/PRSS3	22
GO:0005249	voltage-gated potassium channel activity	15/672	87/18337	5.61846e-07	0.000202546	0.000183635	LRRC26/KCNC2/KCNH8/KCNJ16/KCNK3/SNAP25/KCNK1/KCNQ5/KCNH2/KCNIP2/KCNB1/KCND3/KCNS1/KCNE5/KCNQ3	15
GO:0008236	serine-type peptidase activity	22/672	186/18337	1.33705e-06	0.000288805	0.000261841	KLK10/KLK11/PRSS50/MMP1/KLK7/PCSK1/KLK6/PRSS12/PRSS33/TMPRSS3/TMPRSS4/KLK14/KLK13/PCSK6/KLK4/OVCH2/TMPRSS5/AZU1/TMPRSS11E/PRSS51/CORIN/PRSS3	22
GO:0017171	serine hydrolase activity	22/672	188/18337	1.60225e-06	0.000288805	0.000261841	KLK10/KLK11/PRSS50/MMP1/KLK7/PCSK1/KLK6/PRSS12/PRSS33/TMPRSS3/TMPRSS4/KLK14/KLK13/PCSK6/KLK4/OVCH2/TMPRSS5/AZU1/TMPRSS11E/PRSS51/CORIN/PRSS3	22
GO:0022836	gated channel activity	30/672	337/18337	7.35405e-06	0.000954582	0.000865458	GRIA2/GABRP/CLCA2/LRRC26/KCNC2/GRIA1/KCNH8/KCNJ16/SCNN1G/CHRNB2/KCNK3/CNGA2/SNAP25/KCNK1/CLCA4/CNR1/KCNIP1/KCNQ5/KCNH2/KCNIP2/KCNB1/CHRNA1/TTYH1/KCND3/KCNS1/SCN5A/KCNE5/RYR1/SCN3A/KCNQ3	30
GO:0005267	potassium channel activity	16/672	120/18337	7.94381e-06	0.000954582	0.000865458	LRRC26/KCNC2/KCNH8/KCNJ16/KCNK3/SNAP25/KCNK1/KCNIP1/KCNQ5/KCNH2/KCNIP2/KCNB1/KCND3/KCNS1/KCNE5/KCNQ3	16
GO:0015079	potassium ion transmembrane transporter activity	18/672	152/18337	1.18747e-05	0.0012129	0.00109965	SLC9A2/LRRC26/KCNC2/KCNH8/KCNJ16/KCNK3/SNAP25/KCNK1/KCNIP1/KCNQ5/KCNH2/KCNIP2/KCNB1/KCND3/KCNS1/KCNE5/KCNQ3/ATP12A	18
GO:0022843	voltage-gated cation channel activity	17/672	139/18337	1.34579e-05	0.0012129	0.00109965	LRRC26/KCNC2/KCNH8/KCNJ16/KCNK3/SNAP25/KCNK1/CNR1/KCNQ5/KCNH2/KCNIP2/KCNB1/KCND3/KCNS1/KCNE5/RYR1/KCNQ3	17
GO:0004175	endopeptidase activity	34/672	438/18337	3.3863e-05	0.00248561	0.00225355	CASP14/KLK10/SFRP1/KLK11/PRSS50/MMP1/KLK7/PCSK1/KLK6/PRSS12/PRSS33/TMPRSS3/CAPN13/MMP13/TMPRSS4/KLK14/MMP20/KLK13/PCSK6/KLK4/OVCH2/TMPRSS5/CAPN9/MMP11/ADAM29/AZU1/TMPRSS11E/PRSS51/TRABD2B/MMP24/USP6/ADAMTS8/CORIN/PRSS3	34
GO:0005244	voltage-gated ion channel activity	20/672	197/18337	3.8975e-05	0.00248561	0.00225355	LRRC26/KCNC2/KCNH8/KCNJ16/KCNK3/SNAP25/KCNK1/CNR1/KCNIP1/KCNQ5/KCNH2/KCNIP2/KCNB1/KCND3/KCNS1/SCN5A/KCNE5/RYR1/SCN3A/KCNQ3	20
GO:0022832	voltage-gated channel activity	20/672	197/18337	3.8975e-05	0.00248561	0.00225355	LRRC26/KCNC2/KCNH8/KCNJ16/KCNK3/SNAP25/KCNK1/CNR1/KCNIP1/KCNQ5/KCNH2/KCNIP2/KCNB1/KCND3/KCNS1/SCN5A/KCNE5/RYR1/SCN3A/KCNQ3	20
GO:0005261	cation channel activity	28/672	333/18337	4.13694e-05	0.00248561	0.00225355	GRIA2/LRRC26/KCNC2/GRIA1/KCNH8/KCNJ16/SCNN1G/CHRNB2/TRPM6/KCNK3/CNGA2/SNAP25/KCNK1/CNR1/UNC80/KCNIP1/KCNQ5/KCNH2/KCNIP2/KCNB1/CHRNA1/KCND3/KCNS1/SCN5A/KCNE5/RYR1/SCN3A/KCNQ3	28
GO:0015267	channel activity	35/672	477/18337	8.17823e-05	0.0043903	0.0039804	GRIA2/GABRP/CLCA2/LRRC26/KCNC2/GRIA1/KCNH8/KCNJ16/SCNN1G/CHRNB2/TRPM6/GJB1/KCNK3/CNGA2/SNAP25/KCNK1/CLCA4/CNR1/UNC80/AQP4/KCNIP1/KCNQ5/KCNH2/KCNIP2/KCNB1/CHRNA1/TTYH1/KCND3/KCNS1/SCN5A/KCNE5/RYR1/SCN3A/BCL2/KCNQ3	35
GO:0022803	passive transmembrane transporter activity	35/672	478/18337	8.52485e-05	0.0043903	0.0039804	GRIA2/GABRP/CLCA2/LRRC26/KCNC2/GRIA1/KCNH8/KCNJ16/SCNN1G/CHRNB2/TRPM6/GJB1/KCNK3/CNGA2/SNAP25/KCNK1/CLCA4/CNR1/UNC80/AQP4/KCNIP1/KCNQ5/KCNH2/KCNIP2/KCNB1/CHRNA1/TTYH1/KCND3/KCNS1/SCN5A/KCNE5/RYR1/SCN3A/BCL2/KCNQ3	35
GO:0046873	metal ion transmembrane transporter activity	32/672	425/18337	0.000101666	0.00488674	0.00443049	SLC9A2/LRRC26/KCNC2/SLC6A15/KCNH8/KCNJ16/SCNN1G/TRPM6/KCNK3/SNAP25/KCNK1/CNR1/CLDN16/KCNIP1/KCNQ5/MFSD2A/SLC6A2/KCNH2/KCNIP2/KCNB1/TTYH1/SLC13A5/SLC4A4/KCND3/KCNS1/SCN5A/KCNE5/RYR1/SCN3A/KCNQ3/ATP12A/SLC5A9	32
GO:0005216	ion channel activity	32/672	429/18337	0.000120903	0.00544817	0.00493951	GRIA2/GABRP/CLCA2/LRRC26/KCNC2/GRIA1/KCNH8/KCNJ16/SCNN1G/CHRNB2/TRPM6/KCNK3/CNGA2/SNAP25/KCNK1/CLCA4/CNR1/UNC80/KCNIP1/KCNQ5/KCNH2/KCNIP2/KCNB1/CHRNA1/TTYH1/KCND3/KCNS1/SCN5A/KCNE5/RYR1/SCN3A/KCNQ3	32
GO:0005251	delayed rectifier potassium channel activity	7/672	33/18337	0.000159899	0.00678161	0.00614844	KCNC2/KCNQ5/KCNH2/KCNB1/KCNS1/KCNE5/KCNQ3	7
GO:0050786	RAGE receptor binding	4/672	10/18337	0.000314625	0.0119392	0.0108245	S100A7/S100B/S100A8/S100A9	4
GO:0071723	lipopeptide binding	4/672	10/18337	0.000314625	0.0119392	0.0108245	LBP/CD1A/CD1C/CD1E	4
GO:0008201	heparin binding	16/672	164/18337	0.000355066	0.0128001	0.0116051	SFRP1/FGFR4/LGR6/SERPINA10/SAA1/COL11A1/PCOLCE2/TGFBR3/RSPO4/FGFBP1/FGFR2/PCSK6/FGF9/AZU1/FGF2/ADAMTS8	16
GO:0019838	growth factor binding	14/672	137/18337	0.000511345	0.0175562	0.0159171	ERBB2/LRP2/COL2A1/FGFR4/NTRK2/NTRK3/TGFBR3/FGFBP1/FGFR2/PCSK6/SCN5A/FGFBP2/IGFBP1/NGFR	14
GO:0015459	potassium channel regulator activity	8/672	53/18337	0.000643418	0.0210866	0.0191178	LRRC26/KCNIP1/SGK3/WNK3/KCNIP2/KCNS1/KCNE5/SGK2	8
GO:0008307	structural constituent of muscle	7/672	42/18337	0.000758806	0.0229536	0.0208105	TCAP/MYBPC1/MYBPC2/SORBS2/MYOT/OBSCN/DMD	7
GO:0005539	glycosaminoglycan binding	19/672	228/18337	0.000764058	0.0229536	0.0208105	SFRP1/FGFR4/LGR6/EPYC/SERPINA10/SAA1/COL11A1/BCAN/PCOLCE2/TGFBR3/RSPO4/FGFBP1/FGFR2/PCSK6/FGF9/AZU1/FGF2/ZG16/ADAMTS8	19
GO:0036122	BMP binding	4/672	13/18337	0.00098101	0.0282923	0.0256508	TCAP/SOSTDC1/GDF5/GREM1	4
GO:0048018	receptor ligand activity	32/672	486/18337	0.00106027	0.029402	0.0266569	MIA/EDN3/BMP5/ENHO/ARTN/CHGB/LEP/STC2/GDF5/BDNF/NDP/TSLP/LEFTY2/RLN2/CMTM5/EPO/FGF9/GREM1/NRG2/NRTN/FGF2/CMTM7/IL34/NPY/CXCL2/EPGN/WNT7B/FGF17/WNT2/NTF3/SCT/SEMA6A	32
GO:0017134	fibroblast growth factor binding	5/672	23/18337	0.00126494	0.0333244	0.0302131	FGFR4/TGFBR3/FGFBP1/FGFR2/SCN5A	5
GO:0030546	signaling receptor activator activity	32/672	492/18337	0.00129415	0.0333244	0.0302131	MIA/EDN3/BMP5/ENHO/ARTN/CHGB/LEP/STC2/GDF5/BDNF/NDP/TSLP/LEFTY2/RLN2/CMTM5/EPO/FGF9/GREM1/NRG2/NRTN/FGF2/CMTM7/IL34/NPY/CXCL2/EPGN/WNT7B/FGF17/WNT2/NTF3/SCT/SEMA6A	32
GO:0005200	structural constituent of cytoskeleton	11/672	103/18337	0.00138232	0.0343672	0.0311585	KRT6B/KRT14/KRT5/KRT15/KRT16/GFAP/KRT31/KRT20/ADD2/SORBS2/DMD	11
GO:0030414	peptidase inhibitor activity	16/672	187/18337	0.00147176	0.0353713	0.0320689	SPINK8/SERPINA6/CST9/SERPINB5/SERPINA10/PI15/WFDC2/SERPINA3/SERPINA12/PCSK1N/AMBP/PI16/UMODL1/BIRC7/CRB2/SERPINF2	16
GO:0086008	voltage-gated potassium channel activity involved in cardiac muscle cell action potential repolarization	4/672	15/18337	0.00176649	0.0410852	0.0372493	KCNH2/KCNIP2/KCND3/KCNE5	4
GO:0071855	neuropeptide receptor binding	6/672	37/18337	0.00208756	0.0470354	0.042644	EDN3/CCKBR/GNAO1/NPY/MRAP/MRAP2	6
GO:0019199	transmembrane receptor protein kinase activity	9/672	80/18337	0.00257491	0.0548981	0.0497725	ERBB2/FGFR4/NTRK2/SOSTDC1/NTRK3/TGFBR3/FGFR2/EFNB3/KIT	9
GO:0008083	growth factor activity	14/672	162/18337	0.00258881	0.0548981	0.0497725	MIA/BMP5/ARTN/GDF5/BDNF/LEFTY2/FGF9/NRG2/NRTN/FGF2/IL34/EPGN/FGF17/NTF3	14
GO:0008146	sulfotransferase activity	7/672	52/18337	0.00274431	0.0565328	0.0512547	SULT4A1/CHST4/HS6ST3/CHST9/GAL3ST2/HS3ST4/SULT2B1	7
GO:0004867	serine-type endopeptidase inhibitor activity	10/672	98/18337	0.00314936	0.0630746	0.0571857	SPINK8/SERPINA6/SERPINB5/SERPINA10/WFDC2/SERPINA3/SERPINA12/PCSK1N/AMBP/SERPINF2	10
GO:0048306	calcium-dependent protein binding	9/672	84/18337	0.00359346	0.0700239	0.0634861	S100A7A/S100A7/S100P/S100B/S100A8/S100A9/SNAP25/SYN1/S100A1	9
GO:0004983	neuropeptide Y receptor activity	3/672	10/18337	0.00484788	0.0880055	0.0797889	NPY5R/NPY1R/QRFPR	3
GO:0061134	peptidase regulator activity	17/672	230/18337	0.00492349	0.0880055	0.0797889	SPINK8/SERPINA6/CST9/SERPINB5/SERPINA10/PI15/WFDC2/PCOLCE2/SERPINA3/SERPINA12/PCSK1N/AMBP/PI16/UMODL1/BIRC7/CRB2/SERPINF2	17
GO:0042626	ATPase-coupled transmembrane transporter activity	7/672	58/18337	0.0051085	0.0880055	0.0797889	ABCC12/ABCA12/ABCC11/ABCA13/ABCC2/ABCA10/ATP12A	7
GO:0015276	ligand-gated ion channel activity	12/672	139/18337	0.00512654	0.0880055	0.0797889	GRIA2/GABRP/CLCA2/GRIA1/KCNJ16/SCNN1G/CHRNB2/CNGA2/KCNK1/KCNH2/CHRNA1/RYR1	12
GO:0022834	ligand-gated channel activity	12/672	139/18337	0.00512654	0.0880055	0.0797889	GRIA2/GABRP/CLCA2/GRIA1/KCNJ16/SCNN1G/CHRNB2/CNGA2/KCNK1/KCNH2/CHRNA1/RYR1	12
GO:0008188	neuropeptide receptor activity	6/672	45/18337	0.00571366	0.0958035	0.0868589	NPY5R/NPY1R/SORCS1/QRFPR/NMUR1/TACR1	6
GO:0004865	protein serine/threonine phosphatase inhibitor activity	3/672	11/18337	0.00648579	0.103514	0.0938495	MYOZ1/PPP1R14A/PPP1R14D	3
GO:0099094	ligand-gated cation channel activity	10/672	109/18337	0.00671198	0.103514	0.0938495	GRIA2/GRIA1/KCNJ16/SCNN1G/CHRNB2/CNGA2/KCNK1/KCNH2/CHRNA1/RYR1	10
GO:0004714	transmembrane receptor protein tyrosine kinase activity	7/672	61/18337	0.0067478	0.103514	0.0938495	ERBB2/FGFR4/NTRK2/NTRK3/FGFR2/EFNB3/KIT	7
GO:0015399	primary active transmembrane transporter activity	7/672	61/18337	0.0067478	0.103514	0.0938495	ABCC12/ABCA12/ABCC11/ABCA13/ABCC2/ABCA10/ATP12A	7
GO:0016247	channel regulator activity	12/672	145/18337	0.00713902	0.107234	0.0972221	LRRC26/AMBP/TMPRSS3/KCNIP1/SGK3/WNK3/KCNIP2/NPY/KCNS1/KCNE5/BCL2/SGK2	12
GO:0015081	sodium ion transmembrane transporter activity	12/672	146/18337	0.0075277	0.108894	0.0987273	SLC9A2/SLC6A15/SCNN1G/KCNK1/MFSD2A/SLC6A2/SLC13A5/SLC4A4/SCN5A/SCN3A/ATP12A/SLC5A9	12
GO:1901681	sulfur compound binding	18/672	260/18337	0.0075516	0.108894	0.0987273	SFRP1/FGFR4/LGR6/SERPINA10/SAA1/COL11A1/PCOLCE2/TGFBR3/RSPO4/FGFBP1/FGFR2/OGDHL/PCSK6/GSTM2/FGF9/AZU1/FGF2/ADAMTS8	18
GO:0008528	G protein-coupled peptide receptor activity	12/672	148/18337	0.00835478	0.112351	0.101861	NPY5R/NPY1R/SORCS1/CRHR1/CCKBR/MC5R/QRFPR/NMUR1/CX3CR1/NLRP6/TACR1/OPRL1	12
GO:0042166	acetylcholine binding	3/672	12/18337	0.00841461	0.112351	0.101861	CHRM3/CHRNB2/CHRNA1	3
GO:0045295	gamma-catenin binding	3/672	12/18337	0.00841461	0.112351	0.101861	DSG1/DSC3/CDH2	3
GO:1902282	voltage-gated potassium channel activity involved in ventricular cardiac muscle cell action potential repolarization	3/672	12/18337	0.00841461	0.112351	0.101861	KCNH2/KCND3/KCNE5	3
GO:0001653	peptide receptor activity	12/672	152/18337	0.0102208	0.133985	0.121475	NPY5R/NPY1R/SORCS1/CRHR1/CCKBR/MC5R/QRFPR/NMUR1/CX3CR1/NLRP6/TACR1/OPRL1	12
GO:0031432	titin binding	3/672	13/18337	0.0106447	0.13705	0.124255	TCAP/MYBPC1/OBSCN	3
GO:0099106	ion channel regulator activity	10/672	117/18337	0.0108467	0.137202	0.124392	LRRC26/AMBP/KCNIP1/SGK3/WNK3/KCNIP2/NPY/KCNS1/KCNE5/SGK2	10
GO:0046943	carboxylic acid transmembrane transporter activity	12/672	157/18337	0.0129892	0.158428	0.143636	ABCC11/SLC6A15/OCA2/SLC7A4/SLC16A11/SLC7A3/ABCC2/SLCO1A2/SLC25A18/MFSD2A/SLC38A4/SLC13A5	12
GO:0016782	transferase activity, transferring sulfur-containing groups	7/672	69/18337	0.0130025	0.158428	0.143636	SULT4A1/CHST4/HS6ST3/CHST9/GAL3ST2/HS3ST4/SULT2B1	7
GO:0044548	S100 protein binding	3/672	14/18337	0.013184	0.158428	0.143636	S100B/KCNK3/S100A1	3
GO:0005342	organic acid transmembrane transporter activity	12/672	158/18337	0.0136058	0.160816	0.145802	ABCC11/SLC6A15/OCA2/SLC7A4/SLC16A11/SLC7A3/ABCC2/SLCO1A2/SLC25A18/MFSD2A/SLC38A4/SLC13A5	12
GO:0004866	endopeptidase inhibitor activity	13/672	180/18337	0.0154489	0.177229	0.160682	SPINK8/SERPINA6/CST9/SERPINB5/SERPINA10/WFDC2/SERPINA3/SERPINA12/PCSK1N/AMBP/BIRC7/CRB2/SERPINF2	13
GO:0022804	active transmembrane transporter activity	19/672	301/18337	0.015486	0.177229	0.160682	ABCC12/ABCA12/ABCC11/SLC9A2/SLC6A15/ABCA13/SLC16A11/ABCC2/SLCO1A2/SLC25A18/MFSD2A/SLC6A2/SLC2A10/SLC38A4/SLC13A5/SLC4A4/ABCA10/ATP12A/SLC5A9	19
GO:0004029	aldehyde dehydrogenase (NAD+) activity	3/672	15/18337	0.0160384	0.180683	0.163813	ALDH3B2/ALDH3A1/ALDH1L1	3
GO:0030020	extracellular matrix structural constituent conferring tensile strength	5/672	41/18337	0.0164104	0.182029	0.165034	COL2A1/COL9A1/COL11A1/COL10A1/COL27A1	5
GO:0008509	anion transmembrane transporter activity	26/672	459/18337	0.019147	0.196719	0.178352	ABCA12/ABCC11/GABRP/CLCA2/SLC9A2/SLC6A15/OCA2/SLC7A4/SLC16A11/SLC7A3/HPX/ABCC2/CLCA4/SLCO1A2/SLC25A18/SLC19A3/SLC52A1/MFSD2A/SLC6A2/SLC2A10/SLC38A4/TTYH1/SLC13A5/SLC4A4/ADAMTS8/SLC5A9	26
GO:0004030	aldehyde dehydrogenase [NAD(P)+] activity	3/672	16/18337	0.0192117	0.196719	0.178352	ALDH3B2/ALDH3A1/ALDH1L1	3
GO:0005229	intracellular calcium activated chloride channel activity	3/672	16/18337	0.0192117	0.196719	0.178352	CLCA2/CLCA4/TTYH1	3
GO:0042165	neurotransmitter binding	3/672	16/18337	0.0192117	0.196719	0.178352	CHRM3/CHRNB2/CHRNA1	3
GO:0061778	intracellular chloride channel activity	3/672	16/18337	0.0192117	0.196719	0.178352	CLCA2/CLCA4/TTYH1	3
GO:0044325	ion channel binding	10/672	128/18337	0.0193717	0.196719	0.178352	TCAP/LRRC26/KCNC2/RIMS1/KCNIP2/KCNB1/STAC/KCND3/SCN5A/KCNE5	10
GO:0016903	oxidoreductase activity, acting on the aldehyde or oxo group of donors	5/672	44/18337	0.0217554	0.217856	0.197516	ALDH3B2/AKR1B10/ALDH3A1/ALDH1L1/OGDHL	5
GO:0061135	endopeptidase regulator activity	13/672	192/18337	0.0248463	0.2454	0.222488	SPINK8/SERPINA6/CST9/SERPINB5/SERPINA10/WFDC2/SERPINA3/SERPINA12/PCSK1N/AMBP/BIRC7/CRB2/SERPINF2	13
GO:0098960	postsynaptic neurotransmitter receptor activity	6/672	62/18337	0.0256592	0.250004	0.226662	GRIA1/DRD2/CHRM3/CHRNB2/ADRB1/CHRNA1	6
GO:0019955	cytokine binding	10/672	136/18337	0.0281037	0.266761	0.241855	TCAP/SOSTDC1/TGFBR3/GDF5/GREM1/FGF2/CX3CR1/IL27RA/KIT/IL22RA1	10
GO:0005044	scavenger receptor activity	5/672	47/18337	0.028119	0.266761	0.241855	PRSS12/TMPRSS3/TMPRSS4/SCARA5/TMPRSS5	5
GO:0008514	organic anion transmembrane transporter activity	12/672	177/18337	0.030052	0.279792	0.25367	ABCC11/OCA2/SLC16A11/SLC7A3/ABCC2/SLCO1A2/SLC25A18/SLC52A1/MFSD2A/SLC2A10/SLC13A5/SLC4A4	12
GO:0015026	coreceptor activity	5/672	48/18337	0.0304759	0.279792	0.25367	IGSF1/ZP2/TGFBR3/RGMA/NGFR	5
GO:0005537	mannose binding	3/672	19/18337	0.0306569	0.279792	0.25367	CD207/CLEC4G/CLEC17A	3
GO:0042562	hormone binding	7/672	84/18337	0.0343269	0.309372	0.280487	LRP2/CRYM/CRHR1/CCKBR/AR/MC5R/SULT2B1	7
GO:0070851	growth factor receptor binding	10/672	141/18337	0.0348081	0.309835	0.280907	ARTN/CBLC/TSLP/FGF9/GREM1/NRTN/FGF2/EPGN/FGF17/IL27RA	10
GO:0005179	hormone activity	9/672	122/18337	0.0354663	0.311844	0.282729	EDN3/ENHO/CHGB/LEP/STC2/RLN2/EPO/NPY/SCT	9
GO:0030246	carbohydrate binding	16/672	267/18337	0.0375439	0.322721	0.29259	PTX3/MGAM/CHI3L2/CD207/CHODL/BCAN/CLEC4F/CHI3L1/DCDC1/CLEC4G/FBXO2/CLEC17A/ZG16/CLEC2L/GALNT6/GALNT3	16
GO:0015293	symporter activity	10/672	143/18337	0.037778	0.322721	0.29259	SLC6A15/SLC16A11/SLC25A18/MFSD2A/SLC6A2/SLC2A10/SLC38A4/SLC13A5/SLC4A4/SLC5A9	10
GO:0001664	G protein-coupled receptor binding	17/672	289/18337	0.0380462	0.322721	0.29259	SFRP1/EDN3/SAA1/ADRB1/NDP/CCKBR/GNAO1/REEP2/PACRG/NPY/MRAP/CXCL2/WNT7B/ADRA2C/MRAP2/WNT2/SCT	17
GO:0035250	UDP-galactosyltransferase activity	3/672	21/18337	0.0398776	0.334323	0.303109	UGT8/ABO/COLGALT2	3
GO:0016620	oxidoreductase activity, acting on the aldehyde or oxo group of donors, NAD or NADP as acceptor	4/672	36/18337	0.0416669	0.345308	0.313069	ALDH3B2/AKR1B10/ALDH3A1/ALDH1L1	4
GO:0008194	UDP-glycosyltransferase activity	10/672	146/18337	0.0425541	0.347514	0.315069	B4GALNT2/UGT2B11/UGT2B28/UGT8/UGT2B10/ABO/COLGALT2/EXTL1/GALNT6/GALNT3	10
GO:0004222	metalloendopeptidase activity	8/672	107/18337	0.042897	0.347514	0.315069	MMP1/MMP13/MMP20/MMP11/ADAM29/TRABD2B/MMP24/ADAMTS8	8
GO:0005242	inward rectifier potassium channel activity	3/672	22/18337	0.0449544	0.355907	0.322678	KCNJ16/KCNK1/KCNH2	3
GO:0015464	acetylcholine receptor activity	3/672	22/18337	0.0449544	0.355907	0.322678	CHRM3/CHRNB2/CHRNA1	3
GO:0005109	frizzled binding	4/672	37/18337	0.0454139	0.355907	0.322678	SFRP1/NDP/WNT7B/WNT2	4
GO:0005544	calcium-dependent phospholipid binding	5/672	54/18337	0.0471872	0.357984	0.324561	ANXA8L1/ANXA8/PLA2G4D/DOC2A/PLA2G4F	5
GO:0015370	solute:sodium symporter activity	6/672	72/18337	0.0482336	0.357984	0.324561	SLC6A15/MFSD2A/SLC6A2/SLC13A5/SLC4A4/SLC5A9	6
GO:0005201	extracellular matrix structural constituent	11/672	170/18337	0.04871	0.357984	0.324561	COL2A1/COL9A1/ZP2/FGB/COL11A1/COL10A1/CHI3L1/EMILIN3/LAMA3/COL27A1/UMODL1	11
GO:0015643	toxic substance binding	2/672	10/18337	0.049651	0.357984	0.324561	DSG1/AZU1	2
GO:0019911	structural constituent of myelin sheath	2/672	10/18337	0.049651	0.357984	0.324561	NCMAP/PLP1	2
GO:0070739	protein-glutamic acid ligase activity	2/672	10/18337	0.049651	0.357984	0.324561	TTLL9/TTLL2	2
GO:0070740	tubulin-glutamic acid ligase activity	2/672	10/18337	0.049651	0.357984	0.324561	TTLL9/TTLL2	2
GO:0099528	G protein-coupled neurotransmitter receptor activity	2/672	10/18337	0.049651	0.357984	0.324561	CHRM3/ADRB1	2

## Sheet: KEGG
ID	Description	GeneRatio	BgRatio	pvalue	p.adjust	qvalue	geneID	Count
hsa04080	Neuroactive ligand-receptor interaction	26/275	353/8113	0.000150946	0.0157401	0.0146264	2891/4889/4886/2568/1908/2890/1813/1131/1141/3952/1394/153/887/1268/6019/4161/5737/1134/10316/4852/152/6869/6343/4987/5646/5029	26
hsa00350	Tyrosine metabolism	7/275	36/8113	0.000170859	0.0157401	0.0146264	5409/222/3081/218/4128/4129/1638	7
hsa05030	Cocaine addiction	8/275	49/8113	0.000211937	0.0157401	0.0146264	2891/1813/627/8787/4128/4129/90993/148327	8
hsa04915	Estrogen signaling pathway	14/275	138/8113	0.000230624	0.0157401	0.0146264	3861/399694/107/3872/3866/3868/25984/2775/3881/192666/54474/90993/148327/596	14
hsa00982	Drug metabolism - cytochrome P450	9/275	72/8113	0.000678171	0.0370281	0.0344083	10720/222/54490/218/7365/2946/4128/4129/2327	9
hsa05207	Chemical carcinogenesis - receptor activation	17/275	212/8113	0.00084047	0.0382414	0.0355356	10720/54490/990/107/1141/153/7365/367/2946/2254/90993/2247/10683/148327/253152/8822/596	17
hsa05150	Staphylococcus aureus infection	10/275	96/8113	0.00146508	0.057138	0.0530953	1828/3861/3872/3866/3868/25984/3881/192666/54474/820	10
hsa00360	Phenylalanine metabolism	4/275	16/8113	0.00170251	0.0580983	0.0539876	222/218/4128/4129	4
hsa04151	PI3K-Akt signaling pathway	23/275	354/8113	0.00201802	0.0612134	0.0568823	2064/1280/2264/4915/1297/3694/627/2263/3696/2056/2254/3909/23678/90993/2247/148327/8822/596/10110/4908/4804/3815/3679	23
hsa04976	Bile secretion	9/275	89/8113	0.00307097	0.0838374	0.0779056	10720/54490/107/7365/1244/6579/361/8671/6343	9
hsa02010	ABC transporters	6/275	45/8113	0.00384794	0.089992	0.0836247	94160/26154/85320/154664/1244/10349	6
hsa04730	Long-term depression	7/275	60/8113	0.00395569	0.089992	0.0836247	2891/2890/1394/2775/283748/255189/6261	7
hsa04657	IL-17 signaling pathway	9/275	94/8113	0.0044384	0.0932064	0.0866117	338324/6278/5596/4312/6279/6280/4322/5743/2920	9
hsa00340	Histidine metabolism	4/275	22/8113	0.00583113	0.113707	0.105662	222/218/4128/4129	4
hsa04916	Melanogenesis	9/275	101/8113	0.00710062	0.127157	0.11816	107/2775/90993/1638/8326/148327/7477/7472/3815	9
hsa04020	Calcium signaling pathway	16/275	240/8113	0.00745243	0.127157	0.11816	2064/2264/4915/4916/1131/107/153/2263/887/2254/2247/5737/5137/8822/6261/6869	16
hsa04923	Regulation of lipolysis in adipocytes	6/275	56/8113	0.0112608	0.180834	0.16804	4886/107/153/8660/5743/4852	6
hsa04014	Ras signaling pathway	15/275	232/8113	0.0122768	0.186198	0.173024	2264/4915/399694/627/2263/2254/283455/2247/283748/5063/255189/8822/4908/4804/3815	15
hsa04725	Cholinergic synapse	9/275	113/8113	0.0143095	0.205605	0.191058	1131/107/1141/2775/56479/90993/148327/596/3786	9
hsa00053	Ascorbate and aldarate metabolism	4/275	30/8113	0.0176812	0.233482	0.216962	10720/54490/9104/7365	4
hsa04024	cAMP signaling pathway	14/275	221/8113	0.0179602	0.233482	0.216962	2891/4886/1908/2890/1813/107/1394/2867/153/627/1260/90993/148327/4852	14
hsa04215	Apoptosis - multiple species	4/275	32/8113	0.0220131	0.273163	0.253836	5366/79444/596/4804	4
hsa00040	Pentose and glucuronate interconversions	4/275	34/8113	0.0269399	0.291033	0.270441	10720/54490/57016/7365	4
hsa05224	Breast cancer	10/275	147/8113	0.0275221	0.291033	0.270441	2064/399694/2254/2247/8326/10683/7477/8822/7472/3815	10
hsa05031	Amphetamine addiction	6/275	69/8113	0.0289476	0.291033	0.270441	2891/2890/4128/4129/90993/148327	6
hsa05204	Chemical carcinogenesis - DNA adducts	6/275	69/8113	0.0289476	0.291033	0.270441	10720/54490/7365/2946/10/5743	6
hsa04512	ECM-receptor interaction	7/275	88/8113	0.029327	0.291033	0.270441	1280/341640/1297/3694/3696/3909/3679	7
hsa05226	Gastric cancer	10/275	149/8113	0.0298495	0.291033	0.270441	2064/399694/2263/2254/2247/8326/7477/8822/7472/596	10
hsa04728	Dopaminergic synapse	9/275	132/8113	0.0350884	0.330315	0.306944	2891/2890/1813/2775/4128/4129/90993/3798/148327	9
hsa03320	PPAR signaling pathway	6/275	75/8113	0.0411932	0.374858	0.348336	4312/729359/2172/28965/9415/6319	6
hsa05033	Nicotine addiction	4/275	40/8113	0.0454032	0.399841	0.371551	2891/2568/2890/1141	4
hsa00980	Metabolism of xenobiotics by cytochrome P450	6/275	78/8113	0.0483794	0.406273	0.377528	10720/222/54490/218/7365/2946	6

## Sheet: GSEA
ID	Description	setSize	enrichmentScore	NES	pvalue	p.adjust	qvalues	rank	leading_edge	core_enrichment
hsa04080	Neuroactive ligand-receptor interaction	350	-0.486196	-1.73583	0.00102459	0.0833741	0.0743791	2820	tags=31%, list=16%, signal=27%	727/7432/399967/117/6751/1146/2558/2913/1269/6344/886/2565/1910/1241/1144/799/186/53637/2696/283869/2692/1395/2900/2564/5540/3061/1140/23566/51738/134/5731/5443/3363/2797/23620/2557/148/3953/4829/146/1511/554/136/4985/5644/9340/183/2905/4828/5026/155/2743/66004/9127/7200/2893/84634/53829/797/2899/64106/116444/2569/151/2560/5733/2916/6863/130576/3362/2897/1139/3356/2903/130574/2796/2925/2847/4986/…
hsa04020	Calcium signaling pathway	238	-0.426683	-1.48244	0.00104384	0.0833741	0.0743791	3150	tags=32%, list=18%, signal=27%	8913/91860/4803/5333/845/80310/115/8536/26291/5579/886/7125/6262/775/773/9965/1910/51196/3709/491/5533/1956/2260/109/6547/5260/5578/5731/10345/3363/148/6263/146/26281/113026/4233/89869/136/4485/2905/5026/155/55283/9127/5336/7134/4842/778/5733/114/2774/3362/816/1139/163688/3356/2903/2769/2925/340156/6869/6261/8822/5137/810/185/2255/5737/2247/2254/887/2263/153/107/1131/4916/4915
hsa04724	Glutamatergic synapse	111	-0.517096	-1.68989	0.00113895	0.0833741	0.0743791	3181	tags=37%, list=18%, signal=31%	5338/85358/2770/115/5579/6506/6511/2913/9455/775/100137049/773/3709/2785/2900/5533/2784/109/5578/57030/2905/2893/1742/2899/2788/116444/2916/2786/114/2897/5321/2903/27165/2917/283748/2775/3760/9229/107/2890/2891
hsa04713	Circadian entrainment	95	-0.490548	-1.57383	0.00116009	0.0833741	0.0743791	3150	tags=36%, list=18%, signal=30%	8913/91860/2770/115/117/5579/6262/775/2785/3765/2784/109/5578/5187/6263/2905/2893/2788/4842/2786/2353/114/816/163688/9722/2903/116/6261/810/2775/3760/107/2890/2891
hsa04923	Regulation of lipolysis in adipocytes	54	-0.609394	-1.81204	0.00122249	0.0833741	0.0743791	3117	tags=50%, list=17%, signal=41%	7253/196883/5742/2770/10000/115/5293/4881/8471/4878/3991/109/134/5140/155/5733/114/364/3667/5346/4852/2167/5743/8660/153/107/4886
hsa05033	Nicotine addiction	40	-0.602584	-1.70194	0.00253807	0.136073	0.121393	2625	tags=45%, list=15%, signal=39%	2558/2565/773/2564/2557/57030/2905/2893/116444/2569/2560/1139/2903/2567/1141/2890/2568/2891
hsa00910	Nitrogen metabolism	17	-0.719461	-1.7139	0.0027933	0.136073	0.121393	2721	tags=47%, list=15%, signal=40%	759/760/766/23632/377677/762/765/761
hsa00040	Pentose and glucuronate interconversions	23	0.748946	2.1585	0.00371747	0.154649	0.137964	1166	tags=39%, list=6%, signal=37%	10720/54490/57016/7365/7366/7363/6652/51181/7358
hsa00860	Porphyrin metabolism	32	0.695481	2.17102	0.00408163	0.154649	0.137964	527	tags=19%, list=3%, signal=18%	10720/54490/7365/7366/7363/645
hsa03050	Proteasome	45	0.638423	2.17501	0.00478469	0.163158	0.145555	4613	tags=64%, list=26%, signal=48%	5709/5691/5718/5705/5713/5707/5687/5717/5688/10213/5700/51371/5693/5708/5695/5685/23198/11047/9491/5706/5684/5686/5701/5689/5698/5714/3458/5704/5721
hsa00140	Steroid hormone biosynthesis	49	0.533834	1.79599	0.00561798	0.171745	0.153216	1405	tags=33%, list=8%, signal=30%	10720/54490/7365/7366/6820/7363/79644/6783/6718/1589/8630/1577/1312/412/3283/6716
hsa05032	Morphine addiction	89	-0.468053	-1.48391	0.00705053	0.171745	0.153216	4574	tags=43%, list=25%, signal=32%	5141/409/2790/2550/10681/8622/2555/2566/27115/5151/196883/2770/5138/115/5579/2558/2565/773/2785/2564/3765/2784/109/134/5578/2557/5140/2788/2569/2560/2786/114/5137/2567/2775/3760/107/2568
hsa00900	Terpenoid backbone biosynthesis	22	0.685663	1.97369	0.00727273	0.171745	0.153216	2769	tags=64%, list=15%, signal=54%	3158/3422/3157/2224/3156/39/4598/57107/9453/23590/4597/10654/10269/9986
hsa04730	Long-term depression	57	-0.510175	-1.52505	0.00739827	0.171745	0.153216	3233	tags=35%, list=18%, signal=29%	1392/2770/2781/5579/4067/100137049/773/3709/3479/5578/673/4842/3480/5321/6261/283748/2775/1394/2890/2891
hsa04723	Retrograde endocannabinoid signaling	140	-0.429693	-1.43573	0.00777778	0.171745	0.153216	2865	tags=24%, list=16%, signal=20%	115/5579/2558/775/2565/773/3709/2785/2564/3765/2784/109/5578/2557/57030/747/2893/2788/2569/778/2560/6300/2786/114/2567/5743/1268/2775/3760/107/2890/2568/2891
hsa01240	Biosynthesis of cofactors	136	0.405067	1.68878	0.00892857	0.171745	0.153216	3187	tags=31%, list=18%, signal=26%	10720/54490/8564/195814/7365/7366/23475/1728/7363/8942/4830/8630/6999/217/1719/7358/10797/2643/5373/145226/6472/3620/4833/55163/29926/51109/2677/4831/80308/129607/158067/84274/3242/10327/56474/112724/326625/7364/79646/586/219/54995
hsa04110	Cell cycle	126	0.341809	1.42069	0.00892857	0.171745	0.153216	3050	tags=33%, list=17%, signal=27%	990/8318/9134/9088/983/1869/701/890/4085/7043/5347/23594/9133/995/4998/699/898/891/9232/9700/4175/993/7272/10971/4171/1870/991/25906/7534/5111/7533/7532/25/2932/3066/4172/1111/8243/7529/4173/51529
hsa04727	GABAergic synapse	89	-0.457654	-1.45094	0.00940071	0.171745	0.153216	3160	tags=33%, list=18%, signal=27%	5334/2770/57468/115/5579/2558/10243/775/2565/773/2785/2564/2571/2784/109/5578/2557/2788/2569/778/2560/2786/114/27165/9001/2567/2775/107/2568
hsa02010	ABC transporters	45	0.47181	1.60739	0.00956938	0.171745	0.153216	708	tags=13%, list=4%, signal=13%	94160/26154/85320/1244/10257/8714
hsa05146	Amoebiasis	101	-0.447809	-1.44212	0.0104408	0.17336	0.154657	2818	tags=32%, list=16%, signal=27%	929/10319/5579/5293/7850/7124/383/7042/2919/338382/3553/5578/5273/2921/1285/1511/3914/3569/1288/5275/2774/6317/6318/2769/3918/910/913/2920/3909/911/909/107
hsa00053	Ascorbate and aldarate metabolism	20	0.64122	1.80571	0.0106762	0.17336	0.154657	1166	tags=35%, list=6%, signal=33%	10720/54490/7365/7366/7363/217/7358
hsa00983	Drug metabolism - other enzymes	68	0.422983	1.54288	0.011236	0.174157	0.155368	595	tags=16%, list=3%, signal=16%	10720/54490/7365/10/7366/6241/2940/7363/4257/4830/7083
hsa04024	cAMP signaling pathway	220	-0.394609	-1.36815	0.0125261	0.178347	0.159106	3840	tags=33%, list=21%, signal=26%	7253/2737/1258/64411/196883/3354/492/1080/1906/3725/1392/5338/91860/2770/482/5880/2740/268/10000/115/5727/7432/117/5293/6751/7074/6262/775/4772/6662/4881/51196/486/477/4878/2696/1395/491/3991/109/51738/134/5443/2735/673/5465/5140/2905/5348/2893/116444/778/5733/2353/114/3362/816/163688/2903/7434/116/810/4852/627/153/1394/107/1813/2890/1908/4886/2891
hsa04014	Ras signaling pathway	226	-0.388388	-1.34529	0.0125523	0.178347	0.159106	3619	tags=30%, list=20%, signal=24%	3551/2114/9610/27006/4303/2322/7039/5338/91860/5319/4803/5880/10000/80310/5228/26291/5579/5293/7074/1436/100137049/9965/53358/51196/2785/27040/3479/8831/1956/2260/2784/10235/5578/9846/100271927/3363/8844/26281/4233/1946/5336/391013/1435/2788/51378/3480/2786/10156/5321/163688/10125/2903/4909/3815/4804/4908/8822/5063/810/2255/283748/2247/283455/2254/2263/627/399694/4915
hsa04270	Vascular smooth muscle contraction	130	-0.427674	-1.41847	0.013468	0.18112	0.161579	3675	tags=35%, list=20%, signal=28%	9138/4638/140465/196883/1906/147/5588/4879/91860/5319/115/5579/775/4881/100137049/3709/4878/10266/109/5578/673/148/10267/146/10268/136/183/5581/391013/797/4629/778/114/5321/3779/163688/4880/340156/94274/72/810/185/283748/107/1908
hsa05219	Bladder cancer	41	0.475398	1.57347	0.0142857	0.18112	0.161579	1224	tags=20%, list=7%, signal=18%	2064/4312/1950/999/1869/1890/4313/3576
hsa05030	Cocaine addiction	49	-0.513214	-1.50809	0.0145631	0.18112	0.161579	1333	tags=24%, list=7%, signal=23%	6570/2905/1742/116444/2354/2903/4129/4128/8787/627/1813/2891
hsa05217	Basal cell carcinoma	63	-0.483193	-1.46716	0.0158343	0.18112	0.161579	4328	tags=52%, list=24%, signal=40%	1647/1643/6608/1855/7855/7484/2737/10912/7157/7476/5727/81029/8313/11211/10297/80326/1856/374654/2735/8323/7482/8325/6932/51384/8324/7473/7481/650/8643/83439/54361/7475/8326
hsa04360	Axon guidance	180	-0.393718	-1.34528	0.0159574	0.18112	0.161579	2810	tags=26%, list=16%, signal=22%	5727/81029/7222/5293/57715/5364/91653/1947/10500/5533/2051/3897/4636/10505/9423/5578/2242/4773/1073/80031/1808/4233/285220/2043/2045/56920/4917/1946/6585/7869/137970/64221/5336/84448/658/57689/84612/22854/816/151449/2047/54361/57556/1949/5063/2046/56963
hsa00051	Fructose and mannose metabolism	29	0.507786	1.55974	0.0162602	0.18112	0.161579	2563	tags=38%, list=14%, signal=33%	57016/6652/5214/3099/5373/226/29926/5211/2203/229/3098
hsa05224	Breast cancer	147	-0.402244	-1.35086	0.0164654	0.18112	0.161579	3860	tags=37%, list=21%, signal=29%	23493/28514/7484/10912/2100/27006/182/3725/7157/10000/3714/1021/7476/81029/26291/8313/5293/4041/11211/10297/80326/1856/9965/53358/3479/1956/2260/4040/673/8323/7482/26281/8325/6932/51384/8324/2099/7473/3480/2353/7481/4609/83439/54361/7475/3815/8822/2255/10683/8326/2247/2254/5241/399694
hsa04728	Dopaminergic synapse	131	-0.408166	-1.35792	0.018931	0.1906	0.170036	2444	tags=27%, list=14%, signal=23%	406/6531/91860/2770/10000/5579/775/773/3709/2785/5533/3765/3800/2784/5578/5521/6570/2893/2788/6300/2786/2353/2774/816/163688/2903/810/3798/4129/4128/2775/3760/1813/2890/2891
hsa00512	Mucin type O-glycan biosynthesis	33	0.497288	1.5613	0.0209205	0.1906	0.170036	2060	tags=36%, list=11%, signal=32%	55808/11226/2591/51809/10331/55568/442117/10610/6482/2589/79623/9334
hsa00830	Retinol metabolism	57	0.424972	1.5029	0.0209424	0.1906	0.170036	1237	tags=23%, list=7%, signal=21%	10720/54490/195814/7365/7366/158835/7363/1559/8608/8630/1577/1562/54884
hsa01250	Biosynthesis of nucleotide sugars	35	0.463896	1.49213	0.0210084	0.1906	0.170036	3950	tags=51%, list=22%, signal=40%	64841/3099/7358/5373/2582/6675/54187/91373/29926/55577/2821/3098/5238/9945/2762/10020/2585/29925
hsa04015	Rap1 signaling pathway	207	-0.385063	-1.32481	0.0211416	0.1906	0.170036	3149	tags=27%, list=17%, signal=22%	91860/2770/4803/5880/10000/51466/80310/5228/115/26291/5579/5293/5217/83660/7074/1436/9965/51196/27040/3479/1956/2260/10235/23566/109/5578/8631/673/375189/26281/4233/136/9223/1946/1435/9863/51378/6300/3480/114/84612/163688/2903/3815/4804/8822/810/2255/2247/2254/1268/2775/2263/107/1813
hsa04657	IL-17 signaling pathway	94	0.364087	1.41422	0.0212766	0.1906	0.170036	1483	tags=20%, list=8%, signal=19%	338324/6278/4312/6279/6280/4322/4586/6356/3627/6354/9618/3320/4314/5602/3576/836/8772/5597/3934
hsa03030	DNA replication	36	0.485174	1.57606	0.0214592	0.1906	0.170036	4254	tags=56%, list=24%, signal=43%	2237/1763/4175/4171/57804/5983/5111/5982/4172/10535/4173/5558/6119/3978/5557/23649/5425/10714/5426/54107
hsa05034	Alcoholism	106	-0.424534	-1.376	0.0219653	0.1906	0.170036	3233	tags=27%, list=18%, signal=23%	1392/6531/91860/2770/5173/9759/53358/2785/2784/673/136/6570/10014/2905/2788/116444/2786/2354/163688/2903/810/4852/4129/4128/2775/627/399694/1813/4915
hsa05168	Herpes simplex virus 1 infection	487	-0.338806	-1.22593	0.0223577	0.1906	0.170036	6866	tags=43%, list=38%, signal=28%	342908/84924/100289635/57693/7568/147686/3118/114026/155061/80264/84914/3115/22835/115196/162963/3127/342909/163081/729747/126070/90987/7699/25799/148022/7596/7565/7297/27153/5290/79744/7189/79088/90592/374879/113835/147837/7755/353088/3716/208/7571/84775/51276/284349/3111/79973/388536/355/339318/92283/5371/136051/3442/7769/7733/374899/163049/7539/329/374928/10929/127396/126231/7770/197320/7767/1…
hsa00740	Riboflavin metabolism	8	0.780207	1.74403	0.0234604	0.191857	0.171158	2271	tags=50%, list=13%, signal=44%	5169/645/5167/80308
hsa04310	Wnt signaling pathway	164	-0.394169	-1.33695	0.0236305	0.191857	0.171158	3451	tags=32%, list=19%, signal=26%	9350/7855/84870/7484/64840/4919/3725/7091/7157/2487/5880/7089/7476/81029/8313/5579/4041/11211/10297/4089/8061/80326/4772/1856/29964/5533/4040/5578/4773/57216/284654/27121/8323/7482/8325/6932/4316/51384/8324/7473/6425/7481/4609/816/83439/54361/7475/8326/11197/343637/59352/6422
hsa04934	Cushing syndrome	155	-0.394177	-1.32914	0.0250545	0.198688	0.177252	3827	tags=40%, list=21%, signal=32%	5330/64764/9586/3164/8622/1855/7855/7484/5151/1027/9070/196883/79798/1583/1031/1392/8913/2770/4297/2516/1021/7476/115/3739/81029/8313/11211/10297/80326/775/1856/3709/1395/1956/109/3776/5443/673/1029/8323/7482/8325/949/183/6932/51384/8324/778/7473/114/7481/6770/816/83439/54361/7475/185/56246/8326/3777/1394/107
hsa00220	Arginine biosynthesis	21	-0.613407	-1.52182	0.0262431	0.203384	0.181441	3693	tags=38%, list=21%, signal=30%	2744/84706/5009/383/4842/27165/162417/2875
hsa03460	Fanconi anemia pathway	49	0.446191	1.50113	0.0280899	0.212859	0.189894	1659	tags=24%, list=9%, signal=22%	146956/29089/5888/83990/5889/675/353497/116028/2177/641/672/55215
hsa04726	Serotonergic synapse	112	-0.413308	-1.35171	0.0307167	0.22393	0.199771	3663	tags=34%, list=20%, signal=27%	7220/121278/3354/5742/240/1565/2770/6532/5579/775/100137049/773/3709/2785/3765/2784/242/5578/673/3363/1558/1564/6570/2788/778/2560/2786/3362/5321/3356/239/283748/5743/4129/4128/7166/2775/3760
hsa05212	Pancreatic cancer	76	0.377326	1.40991	0.0308642	0.22393	0.199771	1930	tags=24%, list=11%, signal=21%	2064/1950/5888/1869/6198/7043/5602/6772/675/6199/7046/5881/207/5899/1870/8503/5601/5898
hsa04964	Proximal tubule bicarbonate reclamation	23	-0.577381	-1.45637	0.0354707	0.25199	0.224803	3693	tags=48%, list=21%, signal=38%	6550/2744/482/358/486/477/760/5105/27165/762/8671
hsa04971	Gastric acid secretion	76	-0.44758	-1.38904	0.0369048	0.253476	0.226129	3671	tags=36%, list=20%, signal=28%	4638/196883/9992/1080/91860/2770/482/496/115/5579/3709/477/760/109/3776/5578/495/114/54207/816/163688/340156/810/887/107/1131/3773
hsa04722	Neurotrophin signaling pathway	118	-0.408901	-1.34744	0.0378619	0.253476	0.226129	3344	tags=24%, list=19%, signal=19%	3725/7157/91860/6197/4803/10000/5293/7161/25970/53358/3656/11213/673/4145/5336/6300/816/163688/3667/4909/4804/4908/596/810/627/399694/4916/4915
hsa04060	Cytokine-cytokine receptor interaction	292	-0.350908	-1.24141	0.0379098	0.253476	0.226129	3095	tags=25%, list=17%, signal=21%	4803/268/56300/3570/5197/3579/93/7850/115650/7124/8742/11009/64109/3572/7042/1436/2919/338376/8995/56477/6376/5473/3553/3976/6360/6372/1438/58191/6363/1235/53342/8764/55540/2921/8718/3953/8784/83729/10803/8793/4982/4352/3569/3977/8792/1435/27190/2662/90865/658/654/6369/130399/650/151449/6358/1896/58985/4804/9466/1524/2920/146433/8808/6374/163702/1271/10913/85480/8200/3952/653
hsa00510	N-Glycan biosynthesis	50	0.403518	1.36689	0.0437158	0.286675	0.255747	3369	tags=40%, list=19%, signal=33%	79644/84620/11320/146664/79053/22845/57171/6185/201595/79087/10195/1798/4124/8813/8818/2683/2530/8703/1603/3703
hsa05031	Amphetamine addiction	69	-0.440856	-1.35348	0.0518697	0.333728	0.297723	3423	tags=35%, list=19%, signal=28%	3065/3725/6531/91860/5173/5579/775/5533/5578/6570/2905/2893/116444/2353/2354/816/163688/23237/2903/810/4129/4128/2890/2891
hsa04915	Estrogen signaling pathway	137	-0.384878	-1.28367	0.0535714	0.338294	0.301796	3344	tags=26%, list=19%, signal=22%	3725/7039/91860/2770/8687/10000/115/5293/3310/53358/3709/3885/1956/3765/109/5443/2852/2099/3857/2353/114/163688/596/810/3881/3860/2775/3760/25984/3868/3866/3872/107/5241/399694/3861
hsa04911	Insulin secretion	86	-0.426506	-1.34789	0.056272	0.347959	0.310419	3091	tags=29%, list=17%, signal=24%	482/2740/115/117/5579/886/6262/775/486/6844/477/3783/3651/109/5578/2645/778/114/816/3779/116/9699/6616/107/1131
hsa04141	Protein processing in endoplasmic reticulum	163	0.293941	1.25294	0.0571429	0.347959	0.310419	4084	tags=44%, list=23%, signal=34%	85479/10970/3312/3320/7466/5602/64215/81567/11231/10483/9871/10802/6185/5601/6238/201595/5034/3303/7415/3305/7993/3326/7321/9451/10808/91319/9632/1965/51128/51360/10484/84447/2923/5887/23480/56886/79139/29927/3301/56681/10960/54431/1603/3703/22872/80267/821/91445/79748/823/27102/10273/6745/55968/10952/6396/5611/811/7095/64374/10113/11253/10130/10134/468/23193/29979/3337/55176/9978/23190
hsa04920	Adipocytokine signaling pathway	68	-0.438392	-1.34426	0.059466	0.349203	0.311528	5392	tags=47%, list=30%, signal=33%	948/10891/5563/5564/4792/5599/2182/7133/126129/6774/6794/3551/5588/3717/10000/51422/7124/9021/23305/8471/6517/81616/5443/3953/5105/32/5465/3667/4852/8660/9370/3952
hsa05225	Hepatocellular carcinoma	166	-0.375237	-1.27289	0.0602799	0.349203	0.311528	3314	tags=30%, list=18%, signal=24%	8110/7039/7157/2950/2949/10000/1021/7476/2948/81029/8313/5579/5293/4041/11211/10297/4089/80326/7042/1856/53358/114112/1956/4040/5578/673/1029/8323/7482/4233/8325/6932/51384/51412/8324/5336/6604/7473/2938/3480/7481/4609/83439/54361/7475/8326/2944/2946/399694
hsa04340	Hedgehog signaling pathway	52	-0.470321	-1.38856	0.0604192	0.349203	0.311528	5309	tags=38%, list=30%, signal=27%	64399/8945/3549/50846/409/6608/57467/2737/84455/5727/132884/91653/374654/2735/1954/8643/57758/596/50937/4036
hsa00480	Glutathione metabolism	57	0.384414	1.35947	0.0628272	0.351214	0.313323	2125	tags=32%, list=12%, signal=28%	2678/6241/2940/79017/2877/4257/3417/2539/3418/79094/2936/493869/2941/124975/221357/5226/494143/4259
hsa05204	Chemical carcinogenesis - DNA adducts	57	0.380584	1.34592	0.0628272	0.351214	0.313323	987	tags=21%, list=5%, signal=20%	10720/54490/7365/10/7366/2940/7363/4257/6799/1559/1577/1562
hsa04720	Long-term potentiation	67	-0.4349	-1.32987	0.0644769	0.354623	0.316364	3149	tags=25%, list=17%, signal=21%	91860/6197/5579/775/3709/5533/5578/673/2905/114/816/163688/2903/810/107/2890/2891
hsa04976	Bile secretion	79	0.347968	1.32044	0.0666667	0.358505	0.319827	708	tags=15%, list=4%, signal=15%	10720/54490/7365/1244/7366/6343/366/7363/3949/10257/57552/8714
hsa04916	Melanogenesis	101	-0.402925	-1.29757	0.0672854	0.358505	0.319827	3149	tags=33%, list=17%, signal=27%	91860/2770/7476/115/81029/5579/11211/80326/1856/1910/109/5578/5443/8323/7482/8325/6932/51384/8324/7473/114/7481/816/163688/83439/54361/7475/3815/810/8326/1638/2775/107
hsa04742	Taste transduction	85	-0.417655	-1.31747	0.0704225	0.369447	0.329589	4638	tags=39%, list=26%, signal=29%	50839/285242/5330/2550/22953/2555/342372/196883/259290/3354/50831/50838/259294/50840/6335/54429/50832/2558/775/773/2784/2557/259295/6326/6338/40/114/8645/80835/6328/5137/6340/1131
hsa00565	Ether lipid metabolism	41	-0.48106	-1.365	0.0732323	0.37502	0.33456	3306	tags=41%, list=18%, signal=34%	9514/79153/5338/5319/255043/8540/151056/100137049/254531/5168/56994/391013/122618/5321/283748/133121/7368
hsa00564	Glycerophospholipid metabolism	87	-0.415378	-1.31472	0.0736842	0.37502	0.33456	3629	tags=33%, list=20%, signal=27%	55500/81490/1607/5338/9489/5319/55326/56985/1606/64900/1120/43/56895/151056/3931/100137049/10400/254531/1608/64850/8526/56994/391013/154141/122618/5321/9468/2819/283748
hsa03060	Protein export	22	0.514308	1.48044	0.0763636	0.382941	0.341627	4023	tags=64%, list=22%, signal=49%	11231/6726/6731/9789/23480/6729/29927/6728/90701/10952/6730/7095/58477/55176
hsa04390	Hippo signaling pathway	153	-0.372006	-1.25228	0.0806979	0.398811	0.355785	2874	tags=25%, list=16%, signal=21%	7476/81029/8313/7161/11211/10297/4089/80326/7042/1856/330/126374/29119/5521/8323/7482/8325/6932/51384/79981/8324/1742/7473/658/654/7481/84612/4609/650/151449/83439/54361/7475/286204/8326/23418/8200/653
hsa01524	Platinum drug resistance	72	0.33951	1.27055	0.0934066	0.446435	0.39827	1798	tags=22%, list=10%, signal=20%	2064/1244/7153/2940/4257/332/1317/2941/207/54205/836/8772/672/540/221357/8503
hsa04550	Signaling pathways regulating pluripotency of stem cells	142	-0.370311	-1.24099	0.0950276	0.446435	0.39827	2874	tags=27%, list=16%, signal=23%	7476/93/81029/8313/5293/11211/10297/4089/80326/3572/80712/1856/3479/2260/3976/8323/83729/7482/5080/8325/5460/6932/51384/8324/3977/7473/658/6300/3480/7481/130399/4609/54361/3400/7475/8326/2247/7044/2263
hsa04725	Cholinergic synapse	113	-0.384636	-1.25992	0.0952381	0.446435	0.39827	3215	tags=27%, list=18%, signal=23%	3717/2770/10000/115/43/5579/5293/3770/775/773/3709/2785/2784/109/5578/2788/778/2786/2353/114/816/1139/9132/3786/596/56479/2775/3760/1141/107/1131
hsa04925	Aldosterone synthesis and secretion	98	-0.397576	-1.27716	0.0955711	0.446435	0.39827	3620	tags=36%, list=20%, signal=29%	196883/492/1583/8913/91860/482/5138/115/8536/5579/775/4881/4929/3709/477/4878/491/3991/109/5578/5443/51305/949/183/747/5581/778/114/6770/816/163688/810/185/3777/107
hsa04921	Oxytocin signaling pathway	151	-0.366922	-1.23368	0.0978022	0.450683	0.40206	3880	tags=30%, list=22%, signal=24%	4882/1827/4638/140465/196883/4208/3725/93589/91860/2770/51422/115/8536/5579/3770/6262/775/4772/4881/100137049/3709/4878/5533/1956/3765/109/5578/4773/5997/6263/783/778/2353/114/55799/5321/816/163688/340156/6261/810/283748/5743/2775/3760/107
hsa05226	Gastric cancer	148	-0.366373	-1.22967	0.101099	0.459663	0.410071	2874	tags=30%, list=16%, signal=25%	7476/81029/26291/8313/5293/4041/11211/10297/4089/5243/80326/7042/1856/9965/53358/1045/1956/4040/29119/673/8323/7482/26281/4233/5915/8325/6932/51384/8324/1015/7473/7481/4609/83439/54361/7475/596/8822/2255/8326/2247/2254/2263/399694
hsa05022	Pathways of neurodegeneration - multiple diseases	445	-0.319287	-1.14892	0.104082	0.466998	0.416615	3225	tags=20%, list=18%, signal=17%	9706/22863/6531/10382/91860/64446/9627/5173/6622/7476/147700/347688/81029/7222/1339/5621/8313/5579/7318/4294/4041/11211/10297/7124/80326/6262/8632/775/1856/143471/3709/7802/25981/7278/5533/177/3553/3800/4040/146754/5578/673/27121/8323/2878/6263/7482/8325/125965/2905/2893/51384/4741/3569/8324/1435/1742/1770/4842/778/7473/4744/6300/79861/7481/440738/816/1139/163688/2903/113457/347733/4137/5630/5436…
hsa04022	cGMP-PKG signaling pathway	163	-0.359428	-1.2197	0.11588	0.513182	0.457816	4490	tags=36%, list=25%, signal=27%	100271849/5330/64764/9586/3643/4625/6722/4205/4882/8654/1258/4638/196883/492/4208/147/4879/91860/2770/482/10000/5138/115/775/4772/4881/1910/8471/486/3709/477/4878/491/5533/109/6547/134/4773/148/5997/146/4985/5140/155/5581/151/778/114/3779/163688/4880/3667/340156/810/185/8660/153/107
hsa05215	Prostate cancer	97	0.300509	1.17392	0.119718	0.523384	0.466918	2230	tags=21%, list=12%, signal=18%	2064/367/90993/148327/1950/5328/9134/1869/3320/4314/898/207/6716/1870/8503/5159/3630/3326/6692/2885
hsa00520	Amino sugar and nucleotide sugar metabolism	47	0.372916	1.25882	0.122995	0.530901	0.473624	4761	tags=53%, list=26%, signal=39%	64841/3099/7358/5373/2582/6675/54187/91373/29926/55577/2821/3074/3098/5238/5973/9945/2762/10020/2585/29925/1727/3101/51167/5236/51005
hsa04970	Salivary secretion	91	-0.389435	-1.23844	0.126612	0.539683	0.481459	3462	tags=38%, list=19%, signal=31%	196883/492/362/147/91860/482/115/5579/84569/1471/486/3709/5555/6844/477/3783/491/109/5578/727897/148/4589/6263/146/4025/155/4842/114/5554/163688/810/1473/153/107/1131
hsa04512	ECM-receptor interaction	88	-0.393057	-1.24513	0.130129	0.547827	0.488723	1666	tags=23%, list=9%, signal=21%	80144/158326/1285/960/9900/3914/3680/1288/8515/5649/1101/9899/3918/3679/1299/3909/3696/1297/341640/1280
hsa04924	Renin secretion	67	-0.411741	-1.25905	0.135036	0.554891	0.495025	3149	tags=33%, list=17%, signal=27%	91860/2770/117/358/775/4881/3709/4878/5533/134/5140/183/155/778/163688/116/5137/810/185/22802/153/1908
hsa00062	Fatty acid elongation	23	-0.516274	-1.30223	0.135061	0.554891	0.495025	4550	tags=35%, list=25%, signal=26%	9524/9374/51102/83401/79993/117145/6785/54898
hsa04930	Type II diabetes mellitus	46	-0.433635	-1.25879	0.148883	0.597601	0.533128	3150	tags=33%, list=18%, signal=27%	8913/5293/7124/9021/775/773/8471/6517/3651/8835/5581/2645/3667/8660/9370
hsa04913	Ovarian steroidogenesis	50	-0.429261	-1.26357	0.148962	0.597601	0.533128	3680	tags=36%, list=20%, signal=29%	3292/1588/196883/1583/240/115/100137049/3479/109/949/3480/654/114/6770/5321/283748/5743/107
hsa00440	Phosphonate and phosphinate metabolism	5	-0.70397	-1.2648	0.153251	0.607657	0.542099	1215	tags=60%, list=7%, signal=56%	10390/56994/9468
hsa04960	Aldosterone-regulated sodium reabsorption	37	-0.449964	-1.25107	0.158442	0.619237	0.552429	3603	tags=35%, list=20%, signal=28%	6446/482/23327/5579/5293/4306/486/477/3479/5578/6338/3667/6340
hsa00240	Pyrimidine metabolism	56	0.346287	1.20653	0.160428	0.619237	0.552429	2517	tags=27%, list=14%, signal=23%	6241/5169/4830/7083/124583/956/5167/1890/4860/4833/4907/4831/6240/129607/79077
hsa04935	Growth hormone synthesis, secretion and action	119	-0.359948	-1.18666	0.162011	0.619237	0.552429	3215	tags=25%, list=18%, signal=21%	3717/2770/10000/115/5579/5293/6751/9021/775/53358/8471/3709/6776/3479/6777/2692/109/51738/5578/8835/5336/778/6300/2353/114/3667/3483/8660/107/399694
hsa00360	Phenylalanine metabolism	16	-0.540469	-1.27563	0.163435	0.619237	0.552429	277	tags=31%, list=2%, signal=31%	5053/4129/4128/6898/218
hsa04950	Maturity onset diabetes of the young	26	0.425291	1.261	0.166667	0.624542	0.557162	508	tags=12%, list=3%, signal=11%	4821/3110/389692
hsa05150	Staphylococcus aureus infection	92	-0.373942	-1.19538	0.172093	0.637867	0.569049	3153	tags=21%, list=18%, signal=17%	2204/718/8687/3112/727/3885/6403/1675/10747/3857/5648/3881/3860/25984/3868/3866/3872/3861/1828
hsa03320	PPAR signaling pathway	74	-0.391773	-1.20498	0.17896	0.646921	0.577126	1863	tags=27%, list=10%, signal=24%	81616/1581/5105/5465/2171/10580/51129/364/7350/33/335/10873/4023/5346/440503/2167/2173/9370/28965/729359
hsa05414	Dilated cardiomyopathy	95	-0.371672	-1.19244	0.183295	0.646921	0.577126	3176	tags=28%, list=18%, signal=24%	93589/70/115/7124/6262/775/7042/7273/1674/3479/109/6547/6443/183/3680/783/7134/8515/778/6442/114/55799/3679/1756/3696/153/107
hsa04371	Apelin signaling pathway	136	-0.351442	-1.16947	0.18427	0.646921	0.577126	4492	tags=32%, list=25%, signal=24%	6194/100271849/5330/2790/10681/22808/4205/4638/196883/4208/182/91860/2770/10000/51422/115/9759/4089/5327/6262/3709/2785/3991/2784/109/6547/6263/10014/1958/5140/5581/2788/4842/2786/114/440738/163688/7350/340156/5346/6261/810/185/107
hsa04072	Phospholipase D signaling pathway	143	-0.348879	-1.17098	0.184615	0.646921	0.577126	3317	tags=24%, list=18%, signal=20%	1607/2185/5338/55326/10000/1606/80310/3579/115/5293/2913/56895/100137049/53358/1956/23566/109/1608/5578/9846/8526/554/183/5336/2916/114/5321/2917/3815/185/283748/5737/2205/107/399694
hsa00511	Other glycan degradation	17	0.483706	1.31151	0.185315	0.646921	0.577126	3580	tags=47%, list=20%, signal=38%	129807/2720/3074/2519/4758/2629/23324/175
hsa04261	Adrenergic signaling in cardiomyocytes	149	-0.348453	-1.17075	0.185919	0.646921	0.577126	3176	tags=25%, list=18%, signal=21%	93589/91860/2770/482/70/10000/115/6262/775/486/186/477/491/109/6547/5578/5521/6324/148/146/6330/183/3753/783/7134/778/6300/114/55799/816/163688/596/6331/810/185/153/107
hsa04625	C-type lectin receptor signaling pathway	104	-0.36441	-1.17186	0.192263	0.659076	0.58797	4378	tags=30%, list=24%, signal=23%	51561/10892/22808/834/3551/26253/5971/3725/91860/10000/1959/5293/9020/7124/4772/10332/3709/5533/3553/53342/4773/8844/114548/3569/5336/30835/1960/6300/163688/810/5743
hsa00350	Tyrosine metabolism	35	0.383677	1.2341	0.193277	0.659076	0.58797	2004	tags=31%, list=11%, signal=28%	5409/222/3081/7306/7173/1312/7054/2805/259307/2184/1644
hsa04540	Gap junction	86	-0.371483	-1.174	0.200469	0.676831	0.60381	3164	tags=24%, list=18%, signal=20%	10382/2770/2697/80310/115/347688/5579/3709/7278/1956/109/5578/79861/114/3356/113457/347733/112714/153/107/1813
hsa04630	JAK-STAT signaling pathway	162	-0.340077	-1.15321	0.203664	0.680876	0.607418	4378	tags=30%, list=24%, signal=23%	3595/2688/3568/51561/6774/3590/1439/3575/5777/1441/9655/1489/9063/3455/149233/3717/5771/10000/6778/3570/2273/5293/11009/64109/9021/3572/338376/6776/6777/1956/3976/1438/53342/3953/5292/8835/4352/3569/3977/4609/58985/596/9466/163702/1271/2670/85480/3952
hsa04640	Hematopoietic cell lineage	95	-0.363829	-1.16728	0.212297	0.702847	0.627019	4578	tags=37%, list=25%, signal=28%	3568/966/2993/945/2811/3655/3590/3575/1441/930/926/3690/912/2322/3112/3570/929/7850/7124/933/1436/3553/1438/931/960/3569/1435/290/910/2208/3815/913/1380/911/909
hsa03430	Mismatch repair	23	0.405293	1.16807	0.237918	0.774188	0.690663	3740	tags=43%, list=21%, signal=34%	9156/57804/5983/5111/5982/6119/3978/5425/10714/4292
hsa04213	Longevity regulating pathway - multiple species	62	-0.387078	-1.17216	0.238386	0.774188	0.690663	3620	tags=27%, list=20%, signal=22%	196883/6648/3065/10000/51422/115/5293/3310/8471/3479/109/3480/114/3667/1410/8660/107
hsa00100	Steroid biosynthesis	20	0.425957	1.19952	0.245552	0.782751	0.698303	2777	tags=50%, list=15%, signal=42%	7108/6307/1718/6713/1717/1595/10682/6309/50814/2222
hsa04918	Thyroid hormone synthesis	75	0.290313	1.08952	0.245614	0.782751	0.698303	1113	tags=13%, list=6%, signal=13%	389434/90993/148327/5332/6528/2877/7173/2936/7276/493869
hsa05214	Glioma	75	-0.369704	-1.14079	0.255114	0.8055	0.718597	3228	tags=27%, list=18%, signal=22%	7039/7157/91860/10000/1021/8536/5579/5293/53358/3479/1956/5578/673/1029/5336/3480/816/163688/810/399694
hsa03020	RNA polymerase	31	-0.437338	-1.16262	0.258964	0.810154	0.722749	2658	tags=16%, list=15%, signal=14%	64425/548644/10622/246721/5435
hsa04062	Chemokine signaling pathway	187	-0.322216	-1.10149	0.265458	0.814923	0.727003	4494	tags=32%, list=25%, signal=24%	409/5330/6368/2790/10681/6774/643/9547/2268/10563/196883/3551/7454/2829/3055/2185/6370/3717/2770/5880/10000/5197/3579/115/5579/5293/7074/4067/53358/2919/57580/56477/6376/2785/5473/6777/2784/10235/109/6360/6372/58191/6363/1235/673/2921/6011/10803/5336/2788/2786/114/6369/6358/1524/2920/6374/107/399694
hsa04150	mTOR signaling pathway	152	-0.331452	-1.11619	0.267176	0.814923	0.727003	4654	tags=31%, list=26%, signal=23%	389541/23175/534/6194/10325/90423/3643/1855/245973/6794/6195/7855/81929/7484/58528/3551/6446/9706/6197/10000/64900/7476/81029/5579/5293/4041/11211/7124/80326/1856/3479/4040/5578/673/8323/7482/8325/51384/8324/7473/3480/7481/3667/54361/7475/8326/525
hsa00534	Glycosaminoglycan biosynthesis - heparan sulfate / heparin	24	0.395498	1.15082	0.267658	0.814923	0.727003	1267	tags=21%, list=7%, signal=19%	266722/64579/9956/64132/9955
hsa04658	Th1 and Th2 cell differentiation	90	-0.354769	-1.12577	0.27262	0.822686	0.733929	7590	tags=50%, list=42%, signal=29%	4094/6775/30009/920/3516/55534/3567/3565/3718/3118/3115/3127/5600/7535/919/7297/4794/3716/3558/3111/4792/5599/3595/4851/28514/3551/182/3725/5588/3717/3714/6778/3112/864/11317/4772/27040/6776/6777/5533/4773/84441/6300/2353/10683
hsa05164	Influenza A	167	0.250626	1.06851	0.277778	0.822822	0.73405	2617	tags=21%, list=15%, signal=18%	56649/8743/3627/91543/3838/4939/4938/2224/402569/4599/10241/6772/23430/3576/207/4940/54205/836/8772/64499/3665/7416/291/8503/292/7177/841/64135/8797/1965/356/6041/7113/3836/4600
hsa04912	GnRH signaling pathway	92	-0.35049	-1.12041	0.27907	0.822822	0.73405	3620	tags=28%, list=20%, signal=23%	196883/2798/3725/2185/5338/91860/115/5579/775/100137049/3709/1956/109/5578/2797/1958/778/6300/114/5321/816/163688/2796/810/283748/107
hsa04927	Cortisol synthesis and secretion	65	-0.37067	-1.12886	0.281553	0.822822	0.73405	4484	tags=42%, list=25%, signal=31%	5330/64764/9586/3164/8622/5151/196883/1583/8913/2516/115/3739/775/3709/109/3776/5443/949/183/778/114/6770/190/185/56246/3777/107
hsa04064	NF-kappa B signaling pathway	101	-0.345057	-1.11122	0.287703	0.822822	0.73405	4379	tags=32%, list=24%, signal=24%	7188/1647/10892/55367/3654/10912/3551/5971/4050/472/5588/929/5579/115650/9020/7124/4067/7187/2919/330/7185/27040/3553/6363/2921/5336/8792/1896/596/2920/5743/10913
hsa04978	Mineral absorption	60	-0.376183	-1.13378	0.288533	0.822822	0.73405	2437	tags=22%, list=14%, signal=19%	79901/486/477/491/6547/6523/4493/261729/115019/4499/10568/140803/7018
hsa04392	Hippo signaling pathway - multiple species	28	-0.431023	-1.13483	0.290621	0.822822	0.73405	5052	tags=36%, list=28%, signal=26%	92597/84962/7003/9770/11186/60485/25937/126374/79981/54798
hsa05218	Melanoma	72	-0.364237	-1.11676	0.291463	0.822822	0.73405	4352	tags=33%, list=24%, signal=25%	2248/1647/1643/10912/27006/7157/10000/80310/1021/26291/5293/9965/3479/1956/2260/673/1029/26281/4233/3480/8822/2255/2247/2254
hsa05143	African trypanosomiasis	36	-0.41556	-1.14741	0.293888	0.822822	0.73405	3399	tags=36%, list=19%, signal=29%	54106/3039/5579/3250/7124/4878/3553/169355/5578/3043/3569/3040/335
hsa04380	Osteoclast differentiation	126	-0.332972	-1.10074	0.294382	0.822822	0.73405	3937	tags=27%, list=22%, signal=21%	3726/3690/9103/3551/5468/3455/5971/3725/2355/10000/5293/1535/9020/7124/140885/8061/9021/4772/7042/1436/799/5533/3553/11024/2274/9846/4773/4982/5336/8792/1435/6300/2353/2354
hsa00533	Glycosaminoglycan biosynthesis - keratan sulfate	14	-0.498669	-1.15346	0.302521	0.838696	0.748212	2518	tags=21%, list=14%, signal=18%	9435/6487/10164
hsa00190	Oxidative phosphorylation	105	0.265434	1.06859	0.305556	0.840278	0.749623	4297	tags=43%, list=24%, signal=33%	50617/27089/4700/4718/54205/5464/29796/4702/4709/4728/4726/4716/6391/1337/9114/245972/1349/4715/4710/27068/529/55967/170712/9550/4720/1347/4706/10063/4697/1350/4723/4707/1340/4695/4711/1351/9377/527/10975/1353/8992/51382/6389/127124/7381
hsa04010	MAPK signaling pathway	291	-0.302739	-1.0713	0.310451	0.84691	0.755539	4352	tags=30%, list=24%, signal=23%	2248/1647/5609/3306/3164/3556/11184/3643/3654/22808/6722/6195/4914/115727/9064/10912/3551/27006/5971/4208/3725/2322/7039/7157/93589/8913/6197/4803/5880/10000/7786/80310/5228/1844/1326/929/26291/5579/9020/5801/7124/775/4772/7042/1436/3310/100137049/773/9965/3479/5533/3553/1956/2260/10235/2317/5578/23162/673/26281/4233/1946/783/1435/778/51378/6300/3480/2353/55799/4609/5321/10125/4137/4909/3815/4804…
hsa00330	Arginine and proline metabolism	49	0.323103	1.08702	0.320225	0.85599	0.76364	1706	tags=24%, list=9%, signal=22%	5625/5831/8659/283208/5033/26/217/8974/84735/2805/548596/5832
hsa04061	Viral protein interaction with cytokine and cytokine receptor	97	-0.341648	-1.09783	0.32093	0.85599	0.76364	2948	tags=29%, list=16%, signal=24%	3570/5197/3579/7124/11009/3572/1436/2919/56477/6376/5473/6360/6372/6363/1235/8764/2921/10803/8793/3569/1435/6369/6358/58985/1524/2920/146433/6374
hsa00340	Histidine metabolism	21	-0.455125	-1.12913	0.321823	0.85599	0.76364	2497	tags=33%, list=14%, signal=29%	3067/57571/10841/443/4129/4128/218
hsa04672	Intestinal immune network for IgA production	45	-0.38316	-1.10257	0.325347	0.85599	0.76364	7197	tags=56%, list=40%, signal=33%	7852/3567/3600/3565/3676/3118/3115/3127/959/4055/23495/3695/3558/3111/958/2826/940/6370/3112/115650/9020/56477/10803/3569/8174
hsa00730	Thiamine metabolism	14	-0.488935	-1.13094	0.326331	0.85599	0.76364	1040	tags=36%, list=6%, signal=34%	204/250/122481/249/26289
hsa00603	Glycosphingolipid biosynthesis - globo and isoglobo series	15	-0.479172	-1.12049	0.334722	0.8713	0.777298	2753	tags=33%, list=15%, signal=28%	53947/127550/26301/2523/6489
hsa05200	Pathways in cancer	526	-0.289035	-1.04997	0.337374	0.871549	0.77752	4383	tags=30%, list=24%, signal=24%	2790/7188/51561/2248/1647/10681/6774/3655/1630/1439/1643/3575/2113/6608/1855/2953/1441/11186/7855/4914/3913/115727/23493/28514/7484/2737/10912/1027/9138/196883/3551/5468/2100/3455/27006/3065/1906/182/149233/3725/2322/7039/3717/7157/2950/5338/2949/91860/2770/5880/10000/3714/6778/3570/5228/867/1021/7476/115/2948/5727/10319/81029/26291/8313/5579/5293/4041/11211/10297/4089/80326/8900/3572/7187/7042/1…
hsa01521	EGFR tyrosine kinase inhibitor resistance	79	-0.346871	-1.07921	0.344086	0.876717	0.782131	3228	tags=28%, list=18%, signal=23%	7039/3717/10000/80310/3570/5579/5293/53358/2621/3479/1956/5578/673/4233/3569/5336/3480/596/2247/9542/2263/399694
hsa04614	Renin-angiotensin system	23	-0.43545	-1.09836	0.346521	0.876717	0.782131	2171	tags=30%, list=12%, signal=27%	186/1511/3816/183/1215/290/185
hsa04979	Cholesterol metabolism	49	-0.37026	-1.08802	0.347087	0.876717	0.782131	1803	tags=20%, list=10%, signal=18%	1581/8435/9388/949/338/51129/6770/335/4023/4036
hsa00601	Glycosphingolipid biosynthesis - lacto and neolacto series	27	-0.419503	-1.09447	0.351064	0.87798	0.783257	3015	tags=41%, list=17%, signal=34%	79369/2651/53947/10402/84002/8707/8708/2523/6487/6489/28
hsa04610	Complement and coagulation cascades	85	0.272225	1.04106	0.353333	0.87798	0.783257	2414	tags=31%, list=13%, signal=27%	2244/2266/623/2155/5328/624/2165/10877/725/1604/721/732/2243/81494/3075/2158/720/2151/717/2161/5329/10878/629/2149/731/4179
hsa04929	GnRH secretion	64	-0.356153	-1.08209	0.355311	0.87798	0.783257	4494	tags=34%, list=25%, signal=26%	409/57657/5330/2550/7220/2100/8913/10000/5579/5293/775/3709/3783/3765/5578/2797/348980/2852/84634/778/2796/3760
hsa00920	Sulfur metabolism	8	0.487045	1.08871	0.360704	0.881604	0.786491	4627	tags=62%, list=26%, signal=46%	9060/8991/23474/10380/6821
hsa04972	Pancreatic secretion	101	-0.334407	-1.07692	0.361949	0.881604	0.786491	3663	tags=30%, list=20%, signal=24%	7220/196883/492/1080/1360/5319/482/115/5579/6344/886/6262/51032/486/3709/477/760/1358/491/109/5578/5644/391013/1357/114/5646/8671/22802/107/1131
hsa04514	Cell adhesion molecules	140	-0.317491	-1.06083	0.37	0.888021	0.792215	2967	tags=23%, list=16%, signal=19%	3112/49861/9080/6900/933/24146/79679/5010/57555/3897/23114/6403/7122/94030/23705/1002/9369/4099/4684/3680/9076/4359/9071/57689/22854/8174/9378/22871/57863/149461/10686/3696
hsa00514	Other types of O-glycan biosynthesis	43	0.315045	1.06676	0.374408	0.888021	0.792215	2522	tags=26%, list=14%, signal=22%	11226/2591/51809/3955/84620/55568/442117/2589/79623/727936/79695
hsa04330	Notch signaling pathway	58	-0.358991	-1.07458	0.375	0.888021	0.792215	5973	tags=41%, list=33%, signal=28%	342371/4855/1387/7090/9612/9253/4242/4851/1855/23493/5986/28514/3065/182/7091/196403/7089/3714/11317/2648/1856/84441/83464/10683
hsa05415	Diabetic cardiomyopathy	176	0.23889	1.01087	0.375	0.888021	0.792215	4071	tags=39%, list=23%, signal=30%	1277/5332/1278/5972/1281/2539/2936/7043/5602/4313/27089/7046/4700/4718/207/489/5582/5499/29796/815/7416/291/4702/8503/292/5601/1636/3630/4709/5580/23236/4728/4726/4716/6391/2932/5728/1337/5331/2597/1349/4715/4710/25874/142/55967/170712/4720/1347/4706/488/4697/9945/7417/1350/1432/4723/4707/5350/1340/4695/1509/4711/1351/9377/5879/10975/5603
hsa04350	TGF-beta signaling pathway	92	-0.333473	-1.06601	0.377907	0.888733	0.79285	912	tags=12%, list=5%, signal=11%	658/654/130399/4609/650/151449/3400/56963/7044/8200/653
hsa04750	Inflammatory mediator regulation of TRP channels	97	-0.331202	-1.06427	0.381395	0.890793	0.794688	3309	tags=29%, list=18%, signal=24%	5588/91860/4803/115/162514/5579/5293/59341/100137049/3709/3479/3553/109/5578/5581/79054/5336/6300/40/114/5321/816/163688/3356/239/810/283748/107
hsa04668	TNF signaling pathway	111	-0.323021	-1.05564	0.390661	0.902766	0.805369	5050	tags=36%, list=28%, signal=26%	8809/4792/5608/5599/1051/6416/7133/64764/7188/9586/5609/3726/11035/3551/1906/182/3725/10000/1326/5293/9020/7124/9530/9021/7187/2919/330/7185/6376/3553/3976/6372/2921/3569/1435/6300/2353/2920/6374/5743
hsa04928	Parathyroid hormone synthesis, secretion and action	106	-0.324567	-1.05199	0.393064	0.902766	0.805369	4574	tags=33%, list=25%, signal=25%	5141/409/5330/64764/9586/846/4205/9138/196883/4208/5338/2770/115/5579/4041/64386/5744/4929/3709/9365/1956/2260/4040/109/5578/673/1958/632/2353/114/596/10893/10568/107/1591
hsa04370	VEGF signaling pathway	58	-0.351089	-1.05093	0.394802	0.902766	0.805369	3074	tags=22%, list=17%, signal=19%	5880/10000/5579/5293/100137049/5533/5578/4773/5336/6300/5321/283748/5743
hsa00620	Pyruvate metabolism	47	-0.36068	-1.05341	0.398773	0.902766	0.805369	1523	tags=21%, list=8%, signal=20%	98/97/5105/127/124/32/3945/130/10873/125
hsa04917	Prolactin signaling pathway	70	-0.343207	-1.0545	0.399758	0.902766	0.805369	3215	tags=23%, list=18%, signal=19%	3717/10000/5293/9021/53358/6776/6777/1447/8835/2001/8792/2099/2645/6300/2353/399694
hsa00470	D-Amino acid metabolism	5	-0.596589	-1.07187	0.402477	0.902925	0.805511	6455	tags=80%, list=36%, signal=51%	8528/63826/2744/27165
hsa00770	Pantothenate and CoA biosynthesis	21	0.354643	1.00512	0.417266	0.926968	0.82696	3422	tags=43%, list=19%, signal=35%	5169/5167/217/339896/79646/586/219/79717/8875
hsa04068	FoxO signaling pathway	128	-0.311958	-1.0323	0.418631	0.926968	0.82696	4328	tags=30%, list=24%, signal=23%	1647/6774/3643/3575/6794/5897/10912/1027/3551/1901/6446/6648/4303/472/10000/51422/5293/4089/9455/7042/8471/3479/1956/6517/604/5896/673/5105/114907/85417/3569/6300/2290/3480/3667/10110/23678/8660
hsa00020	Citrate cycle (TCA cycle)	30	0.327496	1.0091	0.42915	0.941555	0.839974	4366	tags=57%, list=24%, signal=43%	3417/3418/47/1431/3419/50/2271/6391/5106/8802/4967/3420/1738/6389/5160/1743/4190
hsa05144	Malaria	49	-0.350867	-1.03103	0.434466	0.941555	0.839974	4382	tags=39%, list=24%, signal=29%	2993/7097/6383/54106/7059/3039/7124/2995/3820/7060/7042/3553/6403/3043/22914/4233/3569/3040/2532
hsa01522	Endocrine resistance	96	-0.32384	-1.04028	0.435035	0.941555	0.839974	3836	tags=31%, list=21%, signal=25%	28514/1027/196883/2100/182/1031/3725/7157/1565/10000/3714/115/5293/53358/3479/1956/109/673/1029/1564/2852/2099/6300/3480/2353/114/596/10683/107/399694
hsa04142	Lysosome	132	0.247833	1.01447	0.436893	0.941555	0.839974	2903	tags=22%, list=16%, signal=19%	50617/58511/1213/1513/950/1510/55353/23457/8763/1176/1514/5641/411/162/2720/1201/26985/3482/9516/3074/2760/9114/2519/245972/1515/5538/23659/130340/6609
hsa00052	Galactose metabolism	29	0.329082	1.01082	0.439024	0.941555	0.839974	1275	tags=17%, list=7%, signal=16%	57016/3938/5214/3099/2582
hsa04146	Peroxisome	82	0.262317	0.994214	0.45098	0.955197	0.852144	3300	tags=34%, list=18%, signal=28%	1384/189/3417/2180/3418/8309/10455/55711/23600/2181/6647/4598/390916/10654/25824/5194/51/10478/54677/570/7498/255027/5052/8800/6342/5191/10005/215
hsa04662	B cell receptor signaling pathway	79	-0.324634	-1.01002	0.452808	0.955197	0.852144	4231	tags=25%, list=24%, signal=19%	10892/5777/930/3635/3551/3725/5880/10000/5579/5293/933/4067/4772/974/5533/11024/4773/5336/2353/1380
hsa00600	Sphingolipid metabolism	46	0.298428	1.01139	0.459184	0.955197	0.852144	2186	tags=33%, list=12%, signal=29%	129807/8560/253782/55331/130367/9517/123099/125981/81537/55304/166929/56624/2720/6610/259230
hsa05220	Chronic myeloid leukemia	76	-0.325948	-1.01156	0.461905	0.955197	0.852144	4328	tags=28%, list=24%, signal=21%	1647/1643/10912/1027/3551/3065/7157/10000/867/1021/5293/4089/7042/53358/6776/6777/9846/673/1029/4609/399694
hsa00980	Metabolism of xenobiotics by cytochrome P450	65	-0.33044	-1.00634	0.464806	0.955197	0.852144	3187	tags=42%, list=18%, signal=34%	2950/1572/2949/1565/3290/1571/27294/1548/373156/2948/873/246181/1553/1549/1564/29785/127/124/1645/1576/374875/130/2938/125/2944/2946/218
hsa04530	Tight junction	165	-0.296861	-1.00728	0.465166	0.955197	0.852144	5298	tags=35%, list=29%, signal=25%	5563/5564/3996/5520/776/861/58494/5599/4628/51807/3059/51762/5609/4478/23513/8777/6794/137075/140465/93643/7454/11346/1080/912/3725/51208/49861/51422/9080/23327/51421/7074/24146/11149/5010/7278/57530/8531/7122/5521/57180/9181/9223/5581/9076/9071/4629/79861/84612/113457/910/913/112714/149461/911/10686/909
hsa01200	Carbon metabolism	113	0.246561	0.991944	0.466667	0.955197	0.852144	2890	tags=33%, list=16%, signal=28%	189/5232/10993/3417/2539/3418/5230/5214/3099/4199/2805/39/113675/6472/226/5226/5223/1431/283871/3419/5211/2203/51/50/2821/2271/5315/1892/229/6391/7086/6888/3098/5095/26227/2597/8802
hsa05167	Kaposi sarcoma-associated herpesvirus infection	193	-0.295268	-1.01327	0.470276	0.955197	0.852144	5023	tags=28%, list=28%, signal=20%	4792/5608/5599/6416/54331/146850/842/4277/2790/10681/5609/6774/131450/1827/3551/3455/3055/3725/3717/7157/22863/91860/718/10000/1021/5293/7538/4067/3572/4772/7187/2919/57580/3709/2785/5533/2784/4773/2921/6932/3569/5336/2788/6300/2786/2353/440738/4609/163688/83439/2920/810/2247/5743
hsa04933	AGE-RAGE signaling pathway in diabetic complications	99	-0.315606	-1.01405	0.47093	0.955197	0.852144	3420	tags=30%, list=19%, signal=25%	1906/3725/3717/5333/10000/5579/5293/7124/4089/2152/4772/7042/51196/6776/6777/177/3553/5578/1285/113026/5292/1958/183/5581/3569/1288/5336/6300/596/185
hsa04977	Vitamin digestion and absorption	23	-0.402015	-1.01403	0.473397	0.955197	0.852144	2501	tags=30%, list=14%, signal=26%	151056/8029/9227/949/338/335/80704
hsa05340	Primary immunodeficiency	36	-0.358532	-0.98995	0.482445	0.962158	0.858354	7272	tags=53%, list=40%, signal=32%	920/5788/5993/3718/695/959/7535/23495/958/64421/3575/930/926/5897/5994/4261/115650/5896/326
hsa04910	Insulin signaling pathway	136	-0.299679	-0.997217	0.483146	0.962158	0.858354	3149	tags=20%, list=17%, signal=17%	91860/10000/5577/90673/867/51422/5293/9021/53358/8471/3991/6517/5260/673/5105/2998/8835/89801/32/5140/10580/2645/163688/3667/810/8660/399694
hsa05410	Hypertrophic cardiomyopathy	90	-0.317432	-1.00729	0.485311	0.962158	0.858354	3176	tags=27%, list=18%, signal=22%	93589/70/51422/7124/6262/775/7042/7273/1674/3479/6547/6443/183/3680/3569/783/7134/8515/778/6442/55799/3679/1756/3696
hsa03440	Homologous recombination	37	0.295517	0.970805	0.49569	0.964239	0.86021	1919	tags=22%, list=11%, signal=19%	146956/5888/83990/5889/675/641/672/57804
hsa05221	Acute myeloid leukemia	67	-0.325287	-0.994684	0.49635	0.964239	0.86021	3280	tags=24%, list=18%, signal=20%	3551/2322/10000/929/5293/8900/1436/6776/6777/673/5292/6932/4609/83439/3815/7704
hsa00670	One carbon pool by folate	18	-0.412757	-0.994202	0.49792	0.964239	0.86021	1482	tags=17%, list=8%, signal=15%	10841/275/10840
hsa04066	HIF-1 signaling pathway	107	0.24433	0.97851	0.5	0.964239	0.86021	2305	tags=21%, list=13%, signal=18%	2064/2056/5232/1950/7037/5230/6198/5214/3099/6199/3091/207/5582/3939/226/815/8503/3630/285/1977/9470/5211
hsa01230	Biosynthesis of amino acids	72	0.262275	0.981514	0.505495	0.964239	0.86021	2810	tags=32%, list=16%, signal=27%	5232/10993/3417/5831/3418/5230/5214/2805/113675/6472/226/5832/5223/1431/3419/5211/50/5315/229/7086/6888/26227/2597
hsa04670	Leukocyte transendothelial migration	112	-0.304925	-0.997248	0.506257	0.964239	0.86021	3282	tags=21%, list=18%, signal=17%	2185/51208/2770/5880/49861/58498/9080/5579/5293/1535/24146/394/5010/29119/4636/5578/7122/9076/5336/9071/6300/149461/10686
hsa00982	Drug metabolism - cytochrome P450	59	-0.325225	-0.977971	0.5086	0.964239	0.86021	1664	tags=37%, list=9%, signal=34%	2950/2949/1565/1571/1548/373156/2948/1549/1558/1564/127/124/1576/130/2938/2327/125/2944/4129/4128/2946/218
hsa04664	Fc epsilon RI signaling pathway	66	-0.32087	-0.980474	0.512165	0.964239	0.86021	5066	tags=33%, list=28%, signal=24%	2534/5608/5599/8605/6416/5609/3635/240/5880/10000/5293/7124/4067/100137049/27040/5578/9846/5336/6300/5321/283748/2205
hsa00604	Glycosphingolipid biosynthesis - ganglio series	15	-0.415199	-0.970895	0.5125	0.964239	0.86021	4928	tags=53%, list=27%, signal=39%	6483/27090/29906/30815/2583/81849/256435/6489
hsa00400	Phenylalanine, tyrosine and tryptophan biosynthesis	6	-0.531609	-0.98679	0.514638	0.964239	0.86021	2320	tags=33%, list=13%, signal=29%	5053/6898
hsa04151	PI3K-Akt signaling pathway	350	-0.27762	-0.991163	0.52459	0.977515	0.872054	2356	tags=30%, list=13%, signal=26%	54331/146850/284/63923/842/2688/2252/1298/6194/64764/2790/2248/10681/9586/3164/7148/3655/3643/3575/7097/6794/28227/1441/930/4914/3913/3690/1027/5586/3551/6446/3455/27006/7059/2322/7039/3717/7157/4803/10000/80310/3570/5228/1021/10319/26291/5293/7060/1436/9965/117145/2785/3479/1956/2260/2784/23566/5578/5521/1285/5105/2998/26281/4233/9223/3914/1946/3680/8115/3569/23239/1288/1435/9863/8515/2788/51378…
hsa00515	Mannose type O-glycan biosynthesis	19	-0.390407	-0.948855	0.540915	0.990676	0.883795	6671	tags=63%, list=37%, signal=40%	10690/84197/29954/11041/79147/2218/55624/27087/84892/135152/9486/6487
hsa05213	Endometrial cancer	58	0.274365	0.97808	0.541237	0.990676	0.883795	1798	tags=14%, list=10%, signal=12%	2064/1950/999/207/1495/2309/1496/8503
hsa04211	Longevity regulating pathway	89	-0.304752	-0.966183	0.548766	0.990676	0.883795	4586	tags=28%, list=25%, signal=21%	9821/26060/64764/9586/3643/6794/196883/5468/6648/7157/10000/51422/115/5293/8471/3479/9365/109/143686/3480/114/3667/8660/9370/107
hsa00260	Glycine, serine and threonine metabolism	39	-0.337269	-0.949843	0.548796	0.990676	0.883795	1004	tags=13%, list=6%, signal=12%	55349/2731/275/4129/4128
hsa05207	Chemical carcinogenesis - receptor activation	186	-0.286312	-0.978326	0.550586	0.990676	0.883795	3836	tags=28%, list=21%, signal=23%	28514/3841/164091/196883/2100/27006/182/3725/3717/2949/6197/2770/85315/10000/115/2948/5579/5293/775/773/6776/6777/1956/688/2053/109/604/5578/26281/5465/155/1576/2099/54852/778/2938/2353/114/4609/1139/596/8822/253152/2255/10683/2247/2944/2254/2946/153/1141/107/5241
hsa00430	Taurine and hypotaurine metabolism	11	-0.43335	-0.94539	0.551079	0.990676	0.883795	2009	tags=36%, list=11%, signal=32%	2571/1036/51380/2686
hsa00513	Various types of N-glycan biosynthesis	38	-0.338818	-0.948471	0.55199	0.990676	0.883795	3749	tags=21%, list=21%, signal=17%	79796/4122/7991/338707/283358/64377/6487/83539
hsa04966	Collecting duct acid secretion	27	-0.364108	-0.949945	0.555851	0.992383	0.885318	4505	tags=33%, list=25%, signal=25%	534/90423/245973/496/6521/760/495/1188/525
hsa05206	MicroRNAs in cancer	160	-0.28418	-0.961379	0.561213	0.99597	0.888518	3722	tags=24%, list=21%, signal=19%	1027/599/2744/3551/3065/472/7157/6624/1021/9759/5579/5293/10297/5243/7042/1956/5578/27250/1029/960/5292/4233/10014/1946/5581/5336/10253/7473/4609/3667/8626/27165/596/5743/8660/399694/5268/1591
hsa05140	Leishmaniasis	74	-0.310121	-0.953842	0.565901	0.99597	0.888518	7056	tags=45%, list=39%, signal=27%	3565/3689/3676/2212/3118/3115/3127/5600/4689/1915/7189/1378/3716/3111/3552/1536/4792/5777/3654/7097/9103/3725/3717/718/3112/5579/1535/7124/7042/3553/6300/2353/5743
hsa00232	Caffeine metabolism	6	0.431614	0.891539	0.569405	0.99597	0.888518	163	tags=17%, list=1%, signal=17%	10
hsa04974	Protein digestion and absorption	102	-0.296961	-0.956175	0.571096	0.99597	0.888518	2399	tags=23%, list=13%, signal=20%	7512/340267/51032/2006/486/136227/477/3783/1358/6547/1285/1302/5644/1288/1357/1310/1308/8645/5646/1299/85301/1297/1280
hsa05120	Epithelial cell signaling in Helicobacter pylori infection	70	-0.306402	-0.941416	0.572464	0.99597	0.888518	5023	tags=30%, list=28%, signal=22%	4792/58494/5599/6416/534/90423/245973/3551/3725/3579/9020/4067/2919/1956/2921/4233/5336/6300/2920/525/5803
hsa01210	2-Oxocarboxylic acid metabolism	18	-0.382441	-0.921179	0.578363	1	0.892113	295	tags=17%, list=2%, signal=16%	84706/162417/2875
hsa05322	Systemic lupus erythematosus	51	-0.311975	-0.92015	0.586207	1	0.892113	3139	tags=18%, list=17%, signal=15%	718/3112/727/7124/1511/1991/2903/730/729
hsa04510	Focal adhesion	198	-0.279206	-0.959283	0.588547	1	0.892113	3074	tags=21%, list=17%, signal=17%	5880/10000/80310/5228/58498/858/10319/5579/5293/83660/7060/857/394/53358/330/3479/1956/2317/4636/5578/673/1285/4233/3914/3680/1288/8515/3480/5649/1101/3918/340156/3679/596/1299/5063/3909/3696/399694/1297/1280
hsa05133	Pertussis	76	-0.301568	-0.935895	0.590476	1	0.892113	3344	tags=24%, list=19%, signal=19%	3725/91860/718/2770/727/929/7124/3553/6372/1073/722/114548/3569/6300/2353/163688/810/6374
hsa04721	Synaptic vesicle cycle	78	-0.30098	-0.933107	0.595694	1	0.892113	4199	tags=27%, list=23%, signal=21%	90423/245973/6572/6812/1759/6531/440279/6532/6506/6511/10815/773/6844/23025/6857/6570/57030/112755/6530/525/6616
hsa04931	Insulin resistance	105	-0.292466	-0.942985	0.597902	1	0.892113	5392	tags=37%, list=30%, signal=26%	948/10891/5563/5564/10062/4792/79660/5599/64764/9586/11001/6774/3643/6195/3551/5588/6197/8473/10000/90673/51422/5579/5293/7124/376497/9021/51085/9882/6517/5105/2998/32/5465/183/5581/3569/3667/8660/28965
hsa01040	Biosynthesis of unsaturated fatty acids	23	0.311985	0.899156	0.598513	1	0.892113	194	tags=9%, list=1%, signal=9%	9415/6319
hsa05231	Choline metabolism in cancer	94	-0.289834	-0.929131	0.607433	1	0.892113	3560	tags=28%, list=20%, signal=22%	7454/6581/6582/3725/1607/5338/5880/10000/1606/10810/80310/1120/5579/10163/5293/100137049/1956/1608/5578/6583/8526/56994/2353/5321/9468/283748
hsa05412	Arrhythmogenic right ventricular cardiomyopathy	77	-0.299688	-0.927442	0.608643	1	0.892113	3176	tags=26%, list=18%, signal=21%	93589/1829/2697/6262/775/1674/29119/6547/6443/6932/3680/783/8515/778/6442/55799/83439/3679/1756/3696
hsa05010	Alzheimer disease	355	-0.268056	-0.959378	0.612705	1	0.892113	3338	tags=19%, list=19%, signal=16%	64116/23516/9706/22863/10382/283375/91860/10000/6622/7476/147700/347688/81029/1339/8313/5293/4041/11211/10297/7124/80326/775/1856/143471/8471/3709/7278/5533/177/3553/3800/4040/673/27121/8323/6263/7482/322/83464/8325/125965/2905/51384/3569/8324/1435/4842/778/7473/79861/7481/1139/163688/2903/113457/347733/3667/4137/54361/4023/7475/112714/810/8326/3798/5743/8660/1131
hsa04114	Oocyte meiosis	125	0.223421	0.932734	0.621622	1	0.892113	1901	tags=17%, list=11%, signal=15%	51806/367/387778/9134/9088/983/6790/4085/5347/9133/995/699/898/891/9232/9700/5499/815/10971/991/3630
hsa05202	Transcriptional misregulation in cancer	172	-0.27429	-0.934685	0.626467	1	0.892113	4183	tags=27%, list=23%, signal=21%	1643/8938/4914/4300/4066/10912/4291/4005/1027/5468/3065/4208/472/1031/2322/7157/5090/4297/2120/929/7850/2119/8013/5327/8900/30012/1436/330/7185/3479/8464/604/4233/3087/5079/51384/3569/3195/1991/7102/3480/4609/8842/2138/9915/4804/7704
hsa04973	Carbohydrate digestion and absorption	45	0.264025	0.899493	0.641148	1	0.892113	2746	tags=29%, list=15%, signal=25%	3938/5332/3099/207/279/8503/480/83756/346562/23236/23439/3098/5331
hsa04744	Phototransduction	28	-0.336764	-0.886657	0.643329	1	0.892113	1499	tags=18%, list=8%, signal=16%	6011/163688/810/5158/8787
hsa05222	Small cell lung cancer	92	-0.283284	-0.905571	0.644186	1	0.892113	5023	tags=33%, list=28%, signal=24%	4792/1286/3911/842/7188/1647/3655/1643/3913/10912/1027/3551/7157/10000/1021/10319/5293/7187/330/7185/1285/5915/3914/1288/2272/4609/3918/596/5743/3909
hsa00531	Glycosaminoglycan degradation	19	-0.3571	-0.867904	0.644938	1	0.892113	6345	tags=42%, list=35%, signal=27%	6448/8372/3423/3425/3373/23553/138050/60495
hsa04623	Cytosolic DNA-sensing pathway	59	-0.293934	-0.883876	0.657248	1	0.892113	5287	tags=22%, list=29%, signal=16%	11277/9641/4792/84265/10623/834/11035/3551/3553/10622/3569/90865/5435
hsa04961	Endocrine and other factor-regulated calcium reabsorption	53	-0.296189	-0.877044	0.662577	1	0.892113	3496	tags=26%, list=19%, signal=21%	1759/492/482/115/5579/486/477/491/9365/6547/793/5578/3816/2099
hsa00120	Primary bile acid biosynthesis	17	-0.364455	-0.868205	0.663408	1	0.892113	2989	tags=29%, list=17%, signal=25%	9023/9420/1581/10858/51302
hsa00592	alpha-Linolenic acid metabolism	23	0.298715	0.86091	0.665428	1	0.892113	1391	tags=22%, list=8%, signal=20%	9415/255189/5320/8399/123745
hsa05020	Prion disease	246	0.214723	0.954227	0.666667	1	0.892113	3176	tags=30%, list=18%, signal=25%	5709/90993/148327/5691/2902/779/4685/3312/10963/5602/732/84790/5718/27089/4700/4718/54205/10381/836/6647/5705/5713/29796/5707/7416/5687/5717/291/4702/5688/8503/10213/203068/292/5601/4709/5580/3303/10383/10376/3305/5700/4728/9451/1965/4726/4716/7280/731/2906/6391/2932/5693/1457/1337/5708/5695/5685/1349/4715/5567/4710/64837/859/774/11047/90550/55967/170712/3710/4720/1347/4706
hsa00130	Ubiquinone and other terpenoid-quinone biosynthesis	11	-0.39332	-0.85806	0.667626	1	0.892113	254	tags=9%, list=1%, signal=9%	6898
hsa00230	Purine metabolism	117	-0.274226	-0.903073	0.671875	1	0.892113	4323	tags=30%, list=24%, signal=23%	5146/8622/122481/272/5152/50808/377841/4882/27115/8654/271/5151/957/196883/22875/270/9061/93034/56985/5138/115/55821/5198/2984/4881/109/9615/5140/2272/114/26289/56953/5137/5158/107
hsa00071	Fatty acid degradation	43	-0.305631	-0.87117	0.672566	1	0.892113	4686	tags=33%, list=26%, signal=24%	2182/224/126129/35/34/37/36/23305/81616/127/124/130/33/125
hsa05321	Inflammatory bowel disease	63	-0.287462	-0.872844	0.677223	1	0.892113	7600	tags=49%, list=42%, signal=29%	3606/4094/6775/30009/4087/3567/3565/3118/3115/3127/8807/7100/3558/3111/3552/4088/8809/3595/51561/6774/7097/6095/149233/3725/6778/3112/7124/4772/7042/3553/3569
hsa04660	T cell receptor signaling pathway	101	-0.276131	-0.889246	0.678654	1	0.892113	7272	tags=43%, list=40%, signal=26%	920/5788/3567/3565/5605/4690/5600/959/7535/9402/919/4893/8440/1437/5290/4794/208/3558/84433/940/2534/4792/5599/5609/10892/5777/926/3551/3725/5588/10000/1326/5293/9020/7124/4772/27040/5533/4773/6300/2353/10125/5063
hsa01212	Fatty acid metabolism	52	0.261652	0.900331	0.680628	1	0.892113	3355	tags=35%, list=19%, signal=28%	9415/6319/2194/2180/1374/31/2181/39/51/1892/84869/23205/3992/5538/54995/6342/7923/27349
hsa04666	Fc gamma R-mediated phagocytosis	92	-0.277605	-0.887418	0.681395	1	0.892113	3662	tags=25%, list=20%, signal=20%	3635/2934/7454/3055/274/5338/5880/10000/10810/5579/10163/5293/4067/100137049/27040/5578/9846/57180/1073/5581/5336/5321/283748
hsa05230	Central carbon metabolism in cancer	69	0.247722	0.904781	0.682081	1	0.892113	1857	tags=19%, list=10%, signal=17%	2064/5979/3417/2539/3418/5214/3099/3091/207/3939/8503/5159/5223
hsa04919	Thyroid hormone signaling pathway	121	0.220178	0.907796	0.693694	1	0.892113	2873	tags=24%, list=16%, signal=20%	5469/9862/1734/5332/7067/652/6567/5214/1733/6772/3091/207/489/5582/8503/8202/480/23236/9969/5211/23439/2932/3066/4854/6548/5331/71/5567/3685
hsa05418	Fluid shear stress and atherosclerosis	137	-0.27063	-0.90262	0.698661	1	0.892113	4057	tags=27%, list=23%, signal=21%	2953/6383/7056/4205/3690/3551/4208/1906/3725/7157/2950/2949/91860/5880/10000/858/2948/93/5293/7850/1535/7124/59341/5327/857/3553/9181/2938/658/6300/2353/163688/4880/596/810/2944/2946
hsa00591	Linoleic acid metabolism	27	-0.324342	-0.846199	0.704787	1	0.892113	3100	tags=33%, list=17%, signal=28%	5319/1571/151056/100137049/1558/1576/391013/5321/283748
hsa04070	Phosphatidylinositol signaling system	94	-0.271994	-0.871942	0.704994	1	0.892113	5367	tags=35%, list=30%, signal=25%	22908/8760/51447/84812/8898/10423/8897/56623/5330/5288/9807/3635/1607/91860/5333/1606/5579/5293/51196/3633/3709/1608/5578/3628/9108/113026/8526/89869/117283/5336/55613/163688/810
hsa04926	Relaxin signaling pathway	128	-0.268484	-0.888443	0.709315	1	0.892113	5092	tags=34%, list=28%, signal=24%	339403/4792/1286/5599/6416/10022/54331/409/5330/64764/2790/10681/9586/5609/3640/196883/1906/3725/2770/10000/115/5293/1910/53358/2785/1956/2784/109/5578/1285/1288/2788/4842/6300/2786/2353/114/2769/6013/6019/2775/107/399694
hsa04216	Ferroptosis	41	-0.298445	-0.84683	0.715909	1	0.892113	3815	tags=34%, list=21%, signal=27%	2730/1536/55240/643246/2182/112483/64116/23516/7157/5621/23305/94033/440738/7018
hsa04260	Cardiac muscle contraction	83	-0.275032	-0.86406	0.717979	1	0.892113	3176	tags=20%, list=18%, signal=17%	93589/482/845/70/1339/6262/775/486/477/6547/10479/10345/125965/783/7134/778/55799
hsa05310	Asthma	28	-0.319687	-0.841696	0.718626	1	0.892113	7091	tags=50%, list=39%, signal=30%	3567/3565/6037/3118/3115/3127/959/3111/958/8288/3112/7124/5553/2205
hsa04012	ErbB signaling pathway	83	-0.273964	-0.860705	0.720329	1	0.892113	3344	tags=23%, list=19%, signal=19%	3725/7039/685/10000/867/5579/5293/53358/6776/6777/1956/5578/673/5336/4609/816/5063/9542/399694
hsa00590	Arachidonic acid metabolism	58	-0.281308	-0.842053	0.72401	1	0.892113	3536	tags=33%, list=20%, signal=26%	6916/5742/240/5319/1571/873/5730/151056/100137049/2053/242/2878/1558/391013/5321/4051/239/283748/5743
hsa05142	Chagas disease	101	-0.267555	-0.861628	0.727378	1	0.892113	3619	tags=19%, list=20%, signal=15%	3551/54106/3725/718/2770/10000/5293/7124/7042/3553/10333/5521/3569/6300/2353/2774/2769/2775/107
hsa05205	Proteoglycans in cancer	202	-0.258985	-0.890145	0.738347	1	0.892113	3021	tags=23%, list=17%, signal=19%	10000/867/7476/858/5727/81029/5579/5293/11211/7124/7074/80326/857/287/7042/51196/3709/3316/3479/1956/2260/2317/5578/27250/673/8323/7482/960/4233/8325/51384/60495/8324/5336/286/2099/7473/6300/3480/7481/4609/816/54361/7475/8326/2247
hsa04122	Sulfur relay system	8	0.33741	0.75423	0.739003	1	0.892113	11926	tags=100%, list=66%, signal=34%	27304/81605/9054/4338/7263/4357/348180/90353
hsa00250	Alanine, aspartate and glutamate metabolism	35	-0.302958	-0.830941	0.739529	1	0.892113	1025	tags=14%, list=6%, signal=13%	2571/443/27165/339983/2875
hsa04620	Toll-like receptor signaling pathway	101	0.225597	0.893177	0.742857	1	0.892113	1863	tags=14%, list=10%, signal=12%	3929/6373/4283/3627/1513/5602/6772/3576/941/207/8772/3665/8503/5601
hsa05145	Toxoplasmosis	110	-0.262403	-0.856849	0.743182	1	0.892113	6741	tags=43%, list=37%, signal=27%	3118/3115/3127/5600/959/2771/284217/7297/22798/7189/3716/208/3111/958/329/3587/4792/5608/3911/5599/146850/842/3306/6774/3655/3654/7097/3913/3551/4261/240/3717/2770/10000/3112/10319/7124/7042/345611/3310/330/3914/6300/3918/596/3909/2775
hsa00380	Tryptophan metabolism	40	-0.28726	-0.811337	0.753807	1	0.892113	2255	tags=20%, list=13%, signal=18%	438/15/130013/169355/11185/4129/4128/7166
hsa04611	Platelet activation	121	0.214086	0.882678	0.765766	1	0.892113	1839	tags=15%, list=10%, signal=13%	2244/2266/255189/1277/5332/1278/1281/2977/5593/2243/5592/207/123745/85366/5499/91807/8503/3688
hsa04215	Apoptosis - multiple species	30	-0.302027	-0.799567	0.769536	1	0.892113	563	tags=13%, list=3%, signal=13%	330/4804/596/5366
hsa04659	Th17 cell differentiation	106	-0.259416	-0.840818	0.769942	1	0.892113	6780	tags=41%, list=38%, signal=25%	3718/3118/3115/3127/5600/7535/919/7297/4794/3716/3558/3111/10148/4088/4792/861/196/5599/51561/6774/3556/6095/3551/149233/3725/5588/3717/6778/3112/3570/4089/3572/4772/27040/6776/6777/5533/3553/4773/3569/6300/2353/9466
hsa00010	Glycolysis / Gluconeogenesis	66	-0.268755	-0.82123	0.77129	1	0.892113	1523	tags=14%, list=8%, signal=13%	5105/127/124/3945/130/2645/2026/125/218
hsa05110	Vibrio cholerae infection	49	0.242332	0.815282	0.780899	1	0.892113	4260	tags=47%, list=24%, signal=36%	50617/11015/6558/11014/9114/245972/71/375/5567/23480/529/9550/29927/60/2778/10952/3784/10945/527/55176/8992/51382/127124
hsa00790	Folate biosynthesis	24	-0.307304	-0.780974	0.781719	1	0.892113	5846	tags=54%, list=32%, signal=37%	250/84105/5860/4337/8644/231/121278/55034/873/10243/5053/249/7166
hsa05163	Human cytomegalovirus infection	220	-0.250736	-0.869328	0.782881	1	0.892113	3282	tags=17%, list=18%, signal=14%	2185/7157/91860/2770/5880/10000/3570/1021/3579/115/5579/5293/7124/4772/3709/6376/2785/5533/3553/1956/2784/109/5578/5731/4773/1029/3569/2788/5733/6300/2786/114/4609/163688/810/5743/2775/107
hsa03450	Non-homologous end-joining	12	0.312153	0.751523	0.797297	1	0.892113	3699	tags=33%, list=21%, signal=26%	2237/7518/2547/7520
hsa01523	Antifolate resistance	29	-0.298215	-0.78619	0.797619	1	0.892113	4071	tags=31%, list=23%, signal=24%	9429/3551/2350/4524/7124/3553/3569/239/2348
hsa04936	Alcoholic liver disease	141	-0.250197	-0.837505	0.79779	1	0.892113	3139	tags=18%, list=17%, signal=15%	718/1571/10000/2168/64900/51422/727/929/9020/7124/7187/2919/3553/2921/127/124/32/5465/6932/3569/130/6300/83439/2920/125/9370
hsa05014	Amyotrophic lateral sclerosis	334	-0.248191	-0.882497	0.79918	1	0.892113	3301	tags=14%, list=18%, signal=11%	203228/9706/7157/22863/10382/64446/147700/347688/1339/5217/6506/7124/94026/8632/143471/7802/25981/144983/7278/5533/3800/146754/2878/375189/125965/2905/4741/1770/4842/4744/6300/79861/440738/2903/113457/347733/5630/9001/596/116442/4747/112714/3798/9542/2890/2891
hsa05132	Salmonella infection	249	-0.248762	-0.866368	0.80063	1	0.892113	4846	tags=23%, list=27%, signal=17%	5599/27128/6416/51807/9844/257364/51209/5609/89953/5288/3654/7097/834/84617/11035/113146/3551/54106/3725/10382/10000/10810/58498/147700/347688/929/5293/5217/5420/7124/330/7278/338382/3553/10333/3800/2317/4636/1780/57180/79659/375189/6932/114548/3569/6300/79861/2353/4609/113457/83439/347733/596/26999/112714/5063/3798
hsa05216	Thyroid cancer	37	-0.284328	-0.790537	0.801299	1	0.892113	4328	tags=27%, list=24%, signal=21%	1647/1643/4914/10912/5468/7157/673/6932/4609/83439
hsa04650	Natural killer cell mediated cytotoxicity	123	-0.253769	-0.836472	0.802025	1	0.892113	3500	tags=33%, list=19%, signal=27%	7535/919/4893/1437/5290/3683/3811/355/3442/8795/154064/3823/51744/9437/2534/4277/9436/5777/259197/3455/3384/2185/353091/117157/5880/6452/5579/5293/7124/4772/53358/27040/10870/5533/5578/3822/4773/673/22914/5336/399694
hsa05223	Non-small cell lung cancer	72	-0.263223	-0.80705	0.802439	1	0.892113	4328	tags=32%, list=24%, signal=24%	1647/6774/1643/11186/10912/7039/7157/10000/1021/5579/5293/6776/6777/1956/3800/5578/673/1029/4233/5915/5336/2272/3798
hsa05012	Parkinson disease	237	0.203741	0.900003	0.809524	1	0.892113	3176	tags=29%, list=18%, signal=24%	5709/51806/5691/201266/5602/7054/84790/5718/27089/4700/7922/4718/54205/10381/836/6647/5705/120892/7332/5713/29796/5707/815/7416/5687/5717/291/4702/5688/10213/203068/292/5601/4709/10383/10376/7295/5700/4728/9451/1812/1965/4726/4716/598/7280/6391/5693/9246/1337/5708/5695/5685/1349/4715/5567/4710/64837/55334/11047/90550/801/55967/170712/3710/25828/4720/1347/4706
hsa05160	Hepatitis C	156	0.212211	0.903143	0.811765	1	0.892113	2617	tags=22%, list=15%, signal=19%	3949/1950/9075/3627/91543/1869/4939/3434/23562/4938/4599/6772/207/4940/54205/836/8772/3665/10971/1870/8503/100506658/841/7534/9451/2885/5522/1965/7533/7532/2932/356/6041/4600
hsa04810	Regulation of actin cytoskeleton	216	-0.243667	-0.84488	0.8125	1	0.892113	2955	tags=17%, list=16%, signal=14%	80310/58498/1730/3645/26291/10163/5293/5217/10297/7074/9965/1956/2260/9459/2245/4636/57180/673/1073/375189/26281/3680/8515/4629/89846/340156/3679/8822/26999/5063/2255/2247/2254/3696/2263/1131
hsa05130	Pathogenic Escherichia coli infection	195	-0.245393	-0.8422	0.819341	1	0.892113	3200	tags=17%, list=18%, signal=14%	51208/10382/10810/49861/9080/347688/283446/10163/7124/24146/147945/5010/7278/3553/7122/57180/9181/9076/114548/3569/9071/4629/6300/79861/644150/2353/113457/347733/26999/112714/5063/149461/10686
hsa05100	Bacterial invasion of epithelial cells	69	0.229532	0.838342	0.820809	1	0.892113	3548	tags=35%, list=20%, signal=28%	2335/1213/999/5829/1495/2017/1496/8503/3688/10097/3678/10096/81873/23607/63916/71/10094/859/2549/60/387/10109/3611/79658
hsa05169	Epstein-Barr virus infection	198	0.208464	0.905918	0.830508	1	0.892113	2195	tags=17%, list=12%, signal=15%	5709/9134/3627/1869/4939/890/956/9636/4938/5602/6772/898/5718/207/4940/54205/836/8772/5705/3665/5713/5707/5717/4734/1870/8503/10213/5601/3135/6890/567/841/29760/5700
hsa05210	Colorectal cancer	86	-0.250054	-0.790251	0.833529	1	0.892113	4637	tags=28%, list=26%, signal=21%	842/26060/1647/1630/1643/10912/3725/7039/7157/5880/10000/8313/5293/10297/4089/7042/1956/673/6932/2353/4609/83439/596/5366
hsa04710	Circadian rhythm	30	-0.285268	-0.755198	0.834437	1	0.892113	5298	tags=33%, list=29%, signal=24%	5563/8945/5564/1408/79365/6095/406/51422/4862/5187
hsa04914	Progesterone-mediated oocyte maturation	97	-0.246366	-0.79166	0.834884	1	0.892113	3143	tags=20%, list=17%, signal=16%	6197/2770/10000/115/729597/442590/5293/8900/441273/3479/109/673/85417/5140/6300/3480/114/107/5241
hsa00563	Glycosylphosphatidylinositol (GPI)-anchor biosynthesis	26	-0.28562	-0.738994	0.844086	1	0.892113	3238	tags=19%, list=18%, signal=16%	65258/9487/80055/80235/2822
hsa00500	Starch and sucrose metabolism	34	-0.27225	-0.745434	0.848052	1	0.892113	1938	tags=12%, list=11%, signal=11%	57733/2998/2645/8972
hsa00030	Pentose phosphate pathway	30	0.23908	0.736667	0.850202	1	0.892113	2548	tags=33%, list=14%, signal=29%	2539/5214/226/5226/5211/2203/2821/229/7086/6888
hsa04932	Non-alcoholic fatty liver disease	150	-0.240638	-0.808453	0.856986	1	0.892113	3036	tags=15%, list=17%, signal=13%	3551/5468/3725/1571/10000/3570/51422/1339/5293/7124/9021/51085/3553/3953/5465/125965/3569/6300/2353/3667/8660/9370/3952
hsa00524	Neomycin, kanamycin and gentamicin biosynthesis	5	-0.379125	-0.681162	0.866873	1	0.892113	1009	tags=40%, list=6%, signal=38%	80201/2645
hsa00750	Vitamin B6 metabolism	6	-0.353771	-0.656682	0.872111	1	0.892113	5047	tags=83%, list=28%, signal=60%	29968/8566/57026/316/493911
hsa00450	Selenocompound metabolism	14	-0.294908	-0.682143	0.87395	1	0.892113	4122	tags=36%, list=23%, signal=28%	51540/9061/114112/118672/11185
hsa04520	Adherens junction	66	0.22235	0.802791	0.877778	1	0.892113	1748	tags=11%, list=10%, signal=10%	2064/999/7046/5881/1495/1496/4008
hsa05017	Spinocerebellar ataxia	139	-0.237452	-0.792197	0.878212	1	0.892113	3225	tags=17%, list=18%, signal=14%	9706/22863/5173/10000/7222/5579/5293/11317/6511/143471/773/3709/3748/5578/1600/2905/116444/5649/2903/6261/3752/2890/2891
hsa00061	Fatty acid biosynthesis	17	-0.288611	-0.687528	0.879888	1	0.892113	2332	tags=24%, list=13%, signal=20%	23305/81616/32/55301
hsa03420	Nucleotide excision repair	45	0.219666	0.748369	0.880383	1	0.892113	14052	tags=100%, list=78%, signal=22%	728340/57804/5983/5111/1642/5982/5887/6119/3978/5425/10714/1069/5426/9978/54107/2072/2967/404672/5886/5427/1022/4331/5984/56655/2071/5985/1161/8451/8450/5981/2074/902/2966/2068/7507/5424/7508/2968/2965/6117/2067/1643/2073/29935/6118
hsa04218	Cellular senescence	155	0.204403	0.86702	0.880952	1	0.892113	1970	tags=16%, list=11%, signal=14%	51806/4605/9134/983/1869/890/7043/9133/898/891/3576/7046/207/2305/2309/993/5499/7416/291/1870/8503/292/3135/10758/8878
hsa00630	Glyoxylate and dicarboxylate metabolism	29	-0.272339	-0.71797	0.883598	1	0.892113	1544	tags=21%, list=9%, signal=19%	2653/51179/54363/112817/2731/275
hsa00280	Valine, leucine and isoleucine degradation	47	0.224378	0.757413	0.887701	1	0.892113	3336	tags=26%, list=19%, signal=21%	3158/3157/217/39/259307/1892/5095/64087/65985/586/219/501
hsa05320	Autoimmune thyroid disease	50	0.218488	0.740114	0.89071	1	0.892113	2699	tags=16%, list=15%, signal=14%	7173/941/1493/3135/1081/3586/356/3002
hsa05323	Rheumatoid arthritis	89	-0.238954	-0.757576	0.891892	1	0.892113	4505	tags=24%, list=25%, signal=18%	534/51561/90423/7097/245973/4050/3725/3112/7124/7042/2919/3553/6372/2921/3569/8792/1435/2353/2920/6374/525
hsa04962	Vasopressin-regulated water reabsorption	44	-0.246987	-0.707382	0.902655	1	0.892113	2194	tags=16%, list=12%, signal=14%	115/6844/109/1780/79659/554/361
hsa05332	Graft-versus-host disease	38	-0.249408	-0.698181	0.903723	1	0.892113	6810	tags=37%, list=38%, signal=23%	3821/3118/3115/3127/3558/3111/3811/355/3552/940/3112/7124/3553/3569
hsa04152	AMPK signaling pathway	119	-0.2313	-0.762538	0.903911	1	0.892113	4421	tags=24%, list=25%, signal=19%	64764/126129/9586/3643/6794/28227/5213/5468/1080/23216/10000/51422/5293/8900/8471/3479/3991/6517/5521/148/3953/5105/2998/32/3480/3667/8660/9370/3952
hsa00650	Butanoate metabolism	28	0.239696	0.723302	0.906122	1	0.892113	1916	tags=18%, list=11%, signal=16%	3158/3157/116285/39/341392
hsa00410	beta-Alanine metabolism	31	-0.257882	-0.685554	0.907039	1	0.892113	2313	tags=16%, list=13%, signal=14%	1807/2571/57571/51380/218
hsa04145	Phagosome	149	-0.230239	-0.773568	0.907591	1	0.892113	4199	tags=21%, list=23%, signal=17%	90423/7097/245973/84617/3690/9103/7059/10382/2204/718/78989/3112/347688/929/1535/7060/10332/4360/7278/338382/10333/1780/79659/949/30835/4842/79861/6441/113457/347733/112714/525
hsa05235	PD-L1 expression and PD-1 checkpoint pathway in cancer	89	-0.234636	-0.743885	0.911868	1	0.892113	6473	tags=35%, list=36%, signal=22%	7535/919/4893/148022/5290/7189/4794/3716/208/940/4792/5608/6774/5777/7097/55509/3551/54106/3725/5588/3717/10000/5293/4772/27040/5533/1956/4773/6300/2353/10125
hsa04975	Fat digestion and absorption	40	-0.242534	-0.685015	0.912437	1	0.892113	3100	tags=22%, list=17%, signal=19%	4547/5319/2168/376497/84649/949/338/391013/335
hsa00561	Glycerolipid metabolism	53	-0.240971	-0.71354	0.912883	1	0.892113	3317	tags=25%, list=18%, signal=20%	1607/55326/1606/64900/80339/56895/1608/116255/8526/84649/9388/154141/4023
hsa00760	Nicotinate and nicotinamide metabolism	34	-0.248777	-0.681164	0.912987	1	0.892113	5037	tags=35%, list=28%, signal=25%	64802/316/27231/30833/54981/23410/93034/554235/23530/23057/349565/56953
hsa05170	Human immunodeficiency virus 1 infection	204	-0.226296	-0.778468	0.914467	1	0.892113	3400	tags=16%, list=19%, signal=13%	140564/472/3725/2185/91860/2770/5880/10000/5579/5293/7124/27350/4772/3709/2785/5533/2784/5578/4773/1073/85417/494551/5336/2788/6300/2786/2353/163688/596/5063/810/2775
hsa04130	SNARE interactions in vesicular transport	33	0.219356	0.688697	0.92887	1	0.892113	4135	tags=42%, list=23%, signal=33%	415117/10791/6809/6804/9342/10652/9554/10490/8773/8673/662/6845/6811/10228
hsa05165	Human papillomavirus infection	329	-0.224996	-0.799857	0.929376	1	0.892113	4310	tags=22%, list=24%, signal=17%	9586/7148/3655/90423/23513/1855/245973/28227/7855/3913/3690/23493/5986/7484/387332/1027/3551/3455/3065/182/472/7059/7157/10000/1021/7476/10319/81029/8313/5293/11211/11317/10297/7124/80326/8900/7060/84667/7187/1856/1956/27175/5521/8323/1285/7482/84441/8325/9223/3914/6932/3680/51384/8324/1288/8515/7473/7481/5649/84612/1101/83439/3918/54361/3679/7475/1299/8326/5743/3909/525/3696/1297/1280
hsa03410	Base excision repair	33	0.2168	0.680674	0.933054	1	0.892113	4397	tags=39%, list=24%, signal=30%	55247/2237/57804/5111/6996/142/3978/23583/5425/10714/5426/54107/10038
hsa04210	Apoptosis	135	-0.222799	-0.742597	0.936242	1	0.892113	4403	tags=36%, list=24%, signal=27%	5783/4893/3563/5290/4217/208/355/7846/7277/2021/8795/329/1616/4792/5599/51807/842/6709/1647/55367/1439/4914/10912/3551/100506742/472/8739/3725/7157/4803/1676/1677/10000/5293/9020/7124/6708/330/7185/3709/7278/10039/79861/2353/113457/596/112714/5366
hsa05134	Legionellosis	57	-0.231174	-0.691041	0.937115	1	0.892113	3139	tags=26%, list=17%, signal=22%	842/3306/7097/834/718/57396/929/1195/7124/3310/2919/3553/2921/3569/2920
hsa05135	Yersinia infection	134	-0.218382	-0.728698	0.93757	1	0.892113	5023	tags=26%, list=28%, signal=19%	4792/5608/5599/1793/6416/4210/9844/5609/3654/834/6195/926/9138/5586/3551/7454/3725/2185/6197/5880/10000/10163/5293/7124/4772/27040/3553/4773/57180/114548/3569/6300/64283/644150/2353
hsa00270	Cysteine and methionine metabolism	47	-0.2287	-0.667948	0.944785	1	0.892113	1930	tags=9%, list=11%, signal=8%	1036/3945/4143/6898
hsa05417	Lipid and atherosclerosis	213	-0.217396	-0.752	0.945493	1	0.892113	3675	tags=20%, list=20%, signal=16%	9138/3551/5468/6648/3725/5452/3717/7157/91860/10000/1548/929/5293/1535/7124/4067/4772/7187/3310/2919/5533/177/3553/10333/6403/5578/4773/1549/2921/1558/142678/338/114548/3569/6300/2353/816/163688/335/596/2920/810
hsa00640	Propanoate metabolism	31	-0.234177	-0.622538	0.946879	1	0.892113	1361	tags=23%, list=8%, signal=21%	160287/35/594/92483/32/3945/55862
hsa05211	Renal cell carcinoma	65	-0.226067	-0.688479	0.947816	1	0.892113	3344	tags=14%, list=19%, signal=11%	3725/7039/10000/5293/7042/673/4233/9915/5063
hsa00310	Lysine degradation	58	-0.224216	-0.671158	0.949257	1	0.892113	1826	tags=12%, list=10%, signal=11%	4297/85007/2145/10157/8424/23127/150572
hsa03010	Ribosome	131	0.194749	0.796111	0.951923	1	0.892113	14516	tags=100%, list=81%, signal=19%	6143/51264/9349/51081/64968/6231/28998/64979/79590/200916/6147/51121/9801/63875/51021/55168/51318/219927/9553/6183/55173/64928/11222/29074/6171/64969/6182/65008/6142/64963/51116/64983/51263/10573/65003/51023/6150/6175/29093/6166/6130/6169/64965/11224/124995/64960/2197/6229/6192/65005/29088/6128/6187/6188/140032/6193/51187/140801/6204/55052/6156/6152/7311/6210/6165/6205/6232/6227/51073/6209/6134/4…
hsa04622	RIG-I-like receptor signaling pathway	68	0.192084	0.700651	0.955056	1	0.892113	2168	tags=15%, list=12%, signal=13%	3627/9636/5602/3576/8772/3665/5601/9474/841/64135
hsa00562	Inositol phosphate metabolism	73	-0.217001	-0.667128	0.965978	1	0.892113	5434	tags=30%, list=30%, signal=21%	51763/22908/84812/8898/10423/8897/56623/5330/5288/3635/5333/5293/51196/3633/3628/9108/113026/89869/5336/55613/138429/9651
hsa05166	Human T-cell leukemia virus 1 infection	220	-0.208644	-0.723389	0.966597	1	0.892113	3620	tags=19%, list=20%, signal=15%	196883/3551/23373/2114/5971/472/1031/3725/7157/10744/10000/3112/115/1959/5293/7538/7850/115650/9020/83660/7124/4089/8061/8900/2648/4772/7042/6776/6777/5533/2874/109/4773/1029/1958/4316/3569/2353/114/4609/107
hsa04613	Neutrophil extracellular trap formation	108	0.19572	0.786914	0.970149	1	0.892113	1861	tags=13%, list=10%, signal=12%	2244/2266/820/366/5332/2359/2243/207/5582/7416/2214/291/8503/292
hsa00532	Glycosaminoglycan biosynthesis - chondroitin sulfate / dermatan sulfate	20	-0.215462	-0.528818	0.977809	1	0.892113	4956	tags=30%, list=28%, signal=22%	56548/113189/22856/126792/64131/9469
hsa04071	Sphingolipid signaling pathway	119	-0.20879	-0.68833	0.981006	1	0.892113	3359	tags=18%, list=19%, signal=14%	8439/7157/5338/2770/5880/10000/5579/5293/7124/53637/134/5578/9846/5521/4985/5581/6300/204219/596/10715/2205
hsa04137	Mitophagy - animal	70	0.190174	0.698456	0.982759	1	0.892113	3525	tags=29%, list=20%, signal=23%	1869/10241/5602/3091/2309/5601/4286/9474/8878/139341/9451/8408/598/1457/23786/664/6237/7316/283106/7314
hsa04115	p53 signaling pathway	71	0.19043	0.707167	0.983333	1	0.892113	1417	tags=14%, list=8%, signal=13%	6241/9134/983/51512/64065/9133/898/891/54205/836
hsa04922	Glucagon signaling pathway	102	-0.203077	-0.65388	0.983683	1	0.892113	3202	tags=18%, list=18%, signal=15%	23235/91860/150094/10000/51422/3709/5533/5260/5105/2998/32/5465/3945/5140/2645/816/163688/810
hsa03013	Nucleocytoplasmic transport	105	0.174592	0.702882	0.986111	1	0.892113	4678	tags=30%, list=26%, signal=22%	22794/392517/3838/402569/5905/91181/3836/5901/8480/3839/6612/1434/1917/6613/6396/11260/9631/64901/10762/55161/10189/10527/2733/4686/55705/3842/3840/9688/51068/9972/51808
hsa04612	Antigen processing and presentation	69	0.184491	0.673834	0.988439	1	0.892113	2176	tags=16%, list=12%, signal=14%	3312/3320/1514/5641/3135/3308/6890/3303/567/3305/3326
hsa04144	Endocytosis	240	-0.195732	-0.680529	0.988518	1	0.892113	4494	tags=18%, list=25%, signal=14%	409/9372/89853/23096/3306/6456/80230/23550/116988/119016/64411/6642/2350/1759/274/414189/5338/30011/6457/867/3579/858/23327/254122/857/3310/9744/1956/3800/57180/5662/93661/440073/6011/644150/3480/84612/138429/84249/9829/3798/2263/2348/23624
hsa05131	Shigellosis	218	-0.196201	-0.680017	0.989572	1	0.892113	6655	tags=34%, list=37%, signal=22%	8454/653857/5600/5289/81/10318/9265/1437/5290/4671/7189/84557/11146/4633/7100/208/9475/25851/8678/80201/643246/4193/84812/8945/4792/5599/1793/27128/9844/199746/3059/5330/10325/8936/7188/10892/92610/834/58528/7307/3551/4303/472/3725/5588/7157/22863/718/5333/10000/58498/929/10163/5293/5217/83660/7124/51196/3709/3553/1956/4636/57180/9181/375189/113026/960/89869/5581/114548/5336/6300/440738/596
hsa05162	Measles	138	0.185844	0.77325	0.990826	1	0.892113	2617	tags=21%, list=15%, signal=18%	9134/4939/4938/3312/4599/5602/6772/898/207/4940/54205/836/8772/3665/8503/5601/3303/841/3305/64135/9451/1965/598/4179/3559/2932/356/1457/4600
hsa05016	Huntington disease	278	-0.19608	-0.691787	0.993834	1	0.892113	3225	tags=13%, list=18%, signal=11%	9706/7157/22863/10382/64446/147700/347688/1339/4294/6506/548644/8632/143471/7802/25981/7278/3800/146754/2878/125965/246721/6875/2893/1742/1770/79861/113457/347733/7350/9001/112714/3798/627/5435/2890/2891
hsa05161	Hepatitis B	162	-0.186553	-0.632609	0.99569	1	0.892113	4421	tags=22%, list=25%, signal=17%	64764/9586/5609/6774/1643/3654/7097/3551/100506742/3725/2185/3717/7157/10000/6778/5579/1959/5293/7124/4089/8900/6554/4772/7187/7042/6776/6777/5578/4773/673/3569/1960/6300/2353/4609/596
hsa05330	Allograft rejection	35	-0.170353	-0.467239	0.997382	1	0.892113	7091	tags=37%, list=39%, signal=23%	3567/3565/3118/3115/3127/959/3558/3111/355/958/940/3112/7124
hsa00970	Aminoacyl-tRNA biosynthesis	25	-0.142006	-0.364508	0.99865	1	0.892113	5244	tags=48%, list=29%, signal=34%	10352/10667/283459/51067/57505/25973/57038/51091/123263/79587/54938/118672
hsa04140	Autophagy - animal	139	-0.166855	-0.556669	0.998883	1	0.892113	6322	tags=29%, list=35%, signal=19%	4893/5290/22800/7189/84557/3916/55102/208/8678/23192/84938/10010/643246/11337/5563/8897/5599/9821/10325/89849/22808/6794/58528/5588/203228/9706/22863/10000/5293/8471/118471/285973/338382/3480/440738/23604/3667/596/116442/8660
hsa04621	NOD-like receptor signaling pathway	181	-0.178721	-0.610991	0.998937	1	0.892113	6301	tags=31%, list=35%, signal=21%	148022/7297/7531/4671/7189/84557/5027/79792/3716/84674/3428/3442/114769/1536/329/10010/643246/7128/11337/9051/9641/4792/5599/4210/5330/7188/22900/846/834/7205/56919/11035/5586/3551/100506742/3455/199713/22861/3725/59082/1535/7124/10628/7187/2919/330/3709/3553/388646/2921/114548/3569/6300/440738/596/171389/2920
hsa05208	Chemical carcinogenesis - reactive oxygen species	196	-0.176302	-0.605606	0.99894	1	0.892113	3619	tags=15%, list=20%, signal=12%	3551/6648/1646/3725/1572/5338/2949/1571/10000/2948/1339/5293/1535/9020/873/1956/2053/673/57412/115019/4025/4233/125965/1645/2938/6300/2353/253152/2944/2946
hsa04714	Thermogenesis	202	-0.169585	-0.582872	0.998941	1	0.892113	3314	tags=12%, list=18%, signal=10%	8110/4879/6197/51422/115/26291/1339/4881/23305/4878/152831/3991/2260/109/125965/155/51412/6604/9658/6300/114/7350/5346/1268/107
hsa03008	Ribosome biogenesis in eukaryotes	72	0.100711	0.376892	1	1	0.892113	3596	tags=17%, list=20%, signal=13%	51096/10799/4931/55505/1457/10528/5901/22803/9790/27341/283106/10940
hsa03015	mRNA surveillance pathway	95	-0.128788	-0.413193	1	1	0.892113	8247	tags=41%, list=46%, signal=22%	23049/79869/10921/29107/10482/5516/5525/26528/51585/55012/64895/8106/5500/2521/9939/10898/11051/29101/642843/10250/5411/11269/4116/22985/23381/29894/5520/65110/7919/140886/8731/23293/28227/80336/65109/132430/5521/23708/4440
hsa03018	RNA degradation	75	-0.135987	-0.419612	1	1	0.892113	6425	tags=28%, list=36%, signal=18%	51691/4850/115752/28960/51690/56915/9924/694/29883/196513/140886/55802/51010/80336/84186/255967/5213/132430/2027/7832/2026
hsa03022	Basal transcription factors	44	-0.153118	-0.438536	1	1	0.892113	8118	tags=45%, list=45%, signal=25%	6877/2963/9519/2961/902/6878/6908/138474/2966/10629/2068/2959/129685/83860/2968/2969/6872/2965/387332/6875
hsa03040	Spliceosome	129	0.118885	0.491904	1	1	0.892113	15871	tags=100%, list=88%, signal=12%	392517/3312/6635/51645/3303/3305/6629/6637/51340/27258/6628/9416/1655/8683/1665/6631/51362/6636/83443/23020/9128/6634/10189/6426/10992/4686/10262/11017/10713/11325/55660/9879/8449/9716/84844/25804/84321/988/23658/22916/23450/6427/57819/3190/9775/51639/3304/8559/11338/6633/22827/8896/10285/10907/153527/4670/29896/26121/27339/55110/3192/10291/6432/9092/56259/5093/6431/220988/6632/6428/5356/10465/97…
hsa04120	Ubiquitin mediated proteolysis	138	-0.140333	-0.467328	1	1	0.892113	6655	tags=25%, list=37%, signal=16%	8454/89910/7328/4214/10054/57154/7189/51366/11059/10277/9817/5371/329/4193/55070/8945/7327/29945/10477/8925/1643/9063/55120/867/23327/148581/7318/9021/330/326/4281/90293/26232/23624
hsa04136	Autophagy - other	31	-0.158413	-0.421127	1	1	0.892113	8363	tags=52%, list=46%, signal=28%	26100/9776/84971/23710/5516/2475/11345/83734/5289/55102/8678/23192/84938/11337/9706/285973
hsa04217	Necroptosis	131	-0.156683	-0.521267	1	1	0.892113	5857	tags=24%, list=33%, signal=17%	355/3552/3442/8795/1536/329/7128/29082/11124/5599/8605/57132/27005/7188/6774/834/11035/3455/3717/6778/7124/100137049/330/6776/6777/3553/114548/90865/5321/816/596/283748
hsa04740	Olfactory transduction	429	-0.110603	-0.397887	1	1	0.892113	3432	tags=5%, list=19%, signal=4%	127623/392309/91860/402135/121275/343171/5138/26496/26664/57101/109/6547/5997/284521/390441/2788/26659/2774/816/163688/5137/810
hsa04940	Type I diabetes mellitus	41	0.166103	0.549766	1	1	0.892113	2699	tags=20%, list=15%, signal=17%	3329/941/3382/4049/3135/3630/356/3002
hsa05152	Tuberculosis	177	-0.170275	-0.581246	1	1	0.892113	3783	tags=16%, list=21%, signal=13%	5994/9103/26253/4261/54106/3717/91860/718/7096/10000/3112/929/7124/10332/7042/4360/3656/5533/3553/10333/8844/3569/30835/6300/816/163688/596/810
hsa05171	Coronavirus disease - COVID-19	226	0.180207	0.797944	1	1	0.892113	1913	tags=12%, list=11%, signal=10%	4312/2244/6143/2266/9349/3627/2165/4939/9636/4938/4599/721/4314/5602/6772/732/2243/3576/4940/5582/720/717/8503/5601/1636/6231
hsa05203	Viral carcinogenesis	165	0.156969	0.668039	1	1	0.892113	2856	tags=18%, list=16%, signal=15%	90993/148327/1237/9134/983/890/898/5829/836/3665/10971/728340/8503/991/3135/85477/841/7534/5700/2885/7533/5315/7532/3066/1642/1233/9114/245972/5567/1111
hsa05416	Viral myocarditis	57	-0.16236	-0.485339	1	1	0.892113	6741	tags=33%, list=37%, signal=21%	3118/3115/3127/959/284217/3683/3111/958/940/2534/842/6445/4625/5880/3112/857/6443/6442/1756
